# Supplementary material for: Attachment of Chiral Functional Groups to Modify the Activity of New GPx Mimetics
Source: MDPI journal article supplement (doi:10.3390/ma15062068), 2022-03-11
Supplement: s1 [file s1]

Article

# Attachment of Chiral Functional Groups to Modify the Activity of New GPx Mimetics

## Supplemental Information

Anna Laskowska<sup>1</sup>, Agata Joanna Pacuła-Miszewska<sup>1</sup>, Angelika Długosz-Pokorska<sup>2</sup>, Anna Janecka<sup>2</sup>, Andrzej Wojtczak<sup>3</sup> and Jacek Ścianowski<sup>1,\*</sup>

<sup>1</sup> Department of Organic Chemistry, Faculty of Chemistry, Nicolaus Copernicus University, 7 Gagarin Street, 87-100 Toruń, Poland; annlas@doktorant.umk.pl (A.L.); pacula@umk.pl (A.J.P.-M.)

<sup>2</sup> Department of Biomolecular Chemistry, Faculty of Medicine, Medical University of Łódź, Mazowiecka 6/8, 92-215 Łódź, Poland; angelika.dlugosz@umed.lodz.pl (A.D.-P.); anna.janecka@umed.lodz.pl (A.J.)

<sup>3</sup> Department of Crystallochemistry and Biocrystallography, Faculty of Chemistry, Nicolaus Copernicus University in Toruń, 7 Gagarin Street, 87-100 Toruń, Poland; awojt@umk.pl

\* Correspondence: jsch@umk.pl

### Table of content

1. <sup>1</sup>H, <sup>13</sup>C and <sup>77</sup>Se NMR spectra of benzoselenazol-3(2H)-ones **18a-31a**, pages 1-22
2. <sup>1</sup>H, <sup>13</sup>C and <sup>77</sup>Se NMR spectra of diselenides **18b-31b**, pages 22-43
3. Crystallographic data of benzoselenazol-3(2H)-ones **24a** and **25a**, pages 43-71

### 1. NMR spectra of benzoselenazol-3(2H)-ones 18a-31a

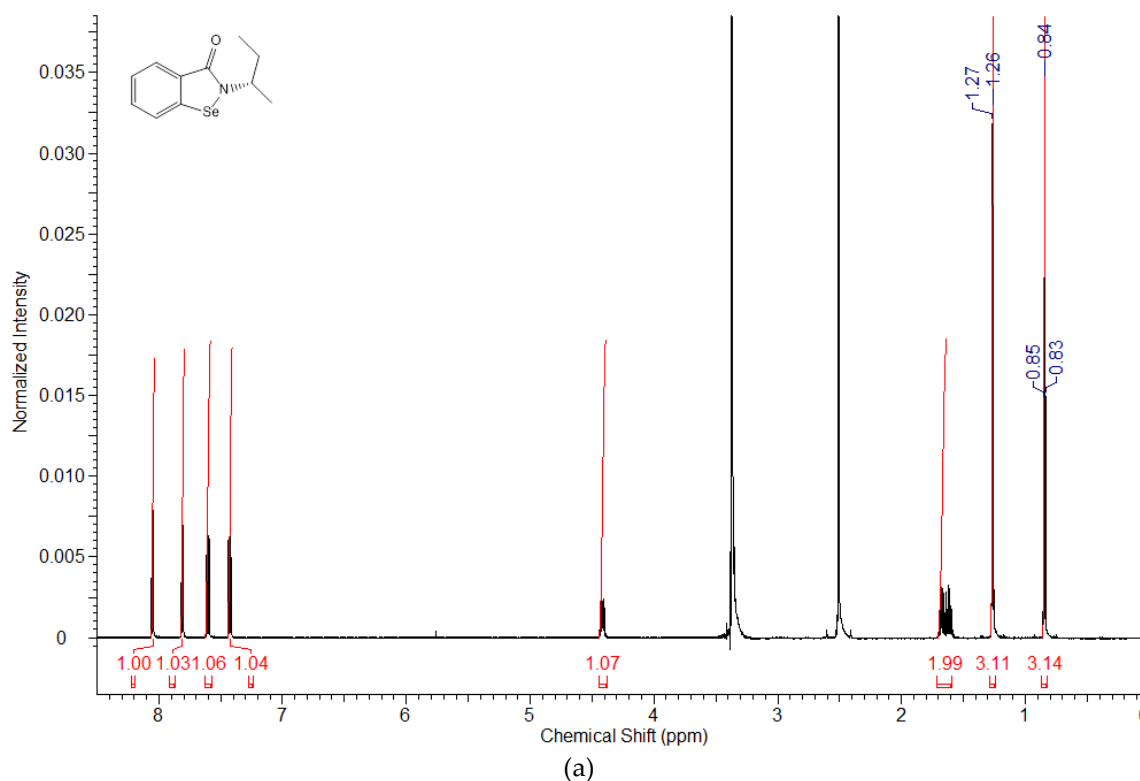

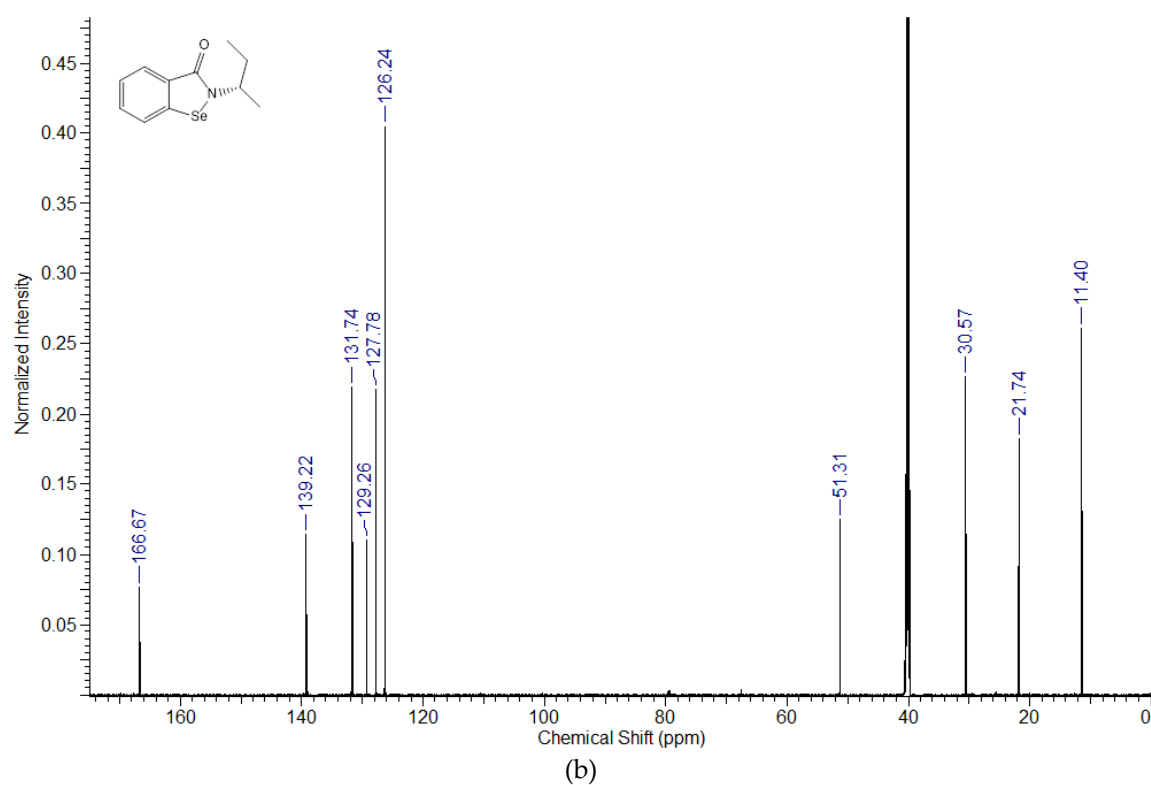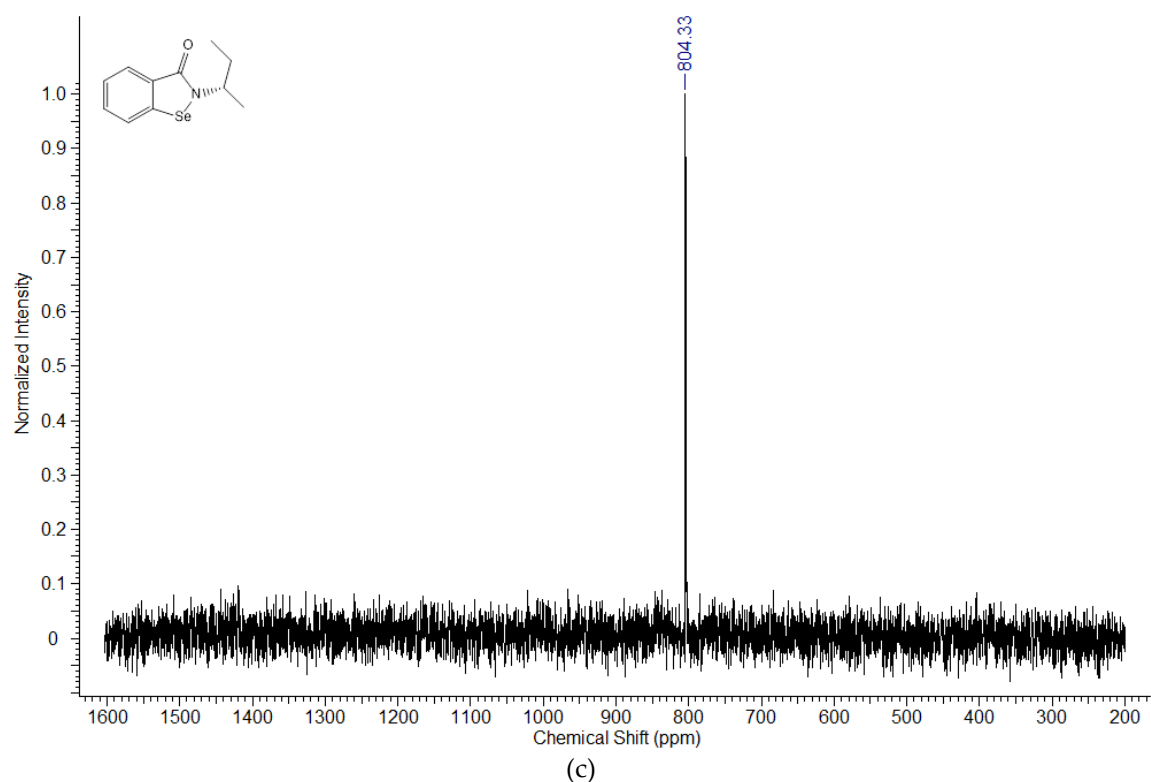

**Figure S1.** (a)  $^1\text{H}$  NMR, (b)  $^{13}\text{C}$  NMR, and (c)  $^{77}\text{Se}$  NMR spectra of *N*-[(*S*)(+)-*sec*-butyl]-1,2-benziselenazol-3(2*H*)-one **18a**.

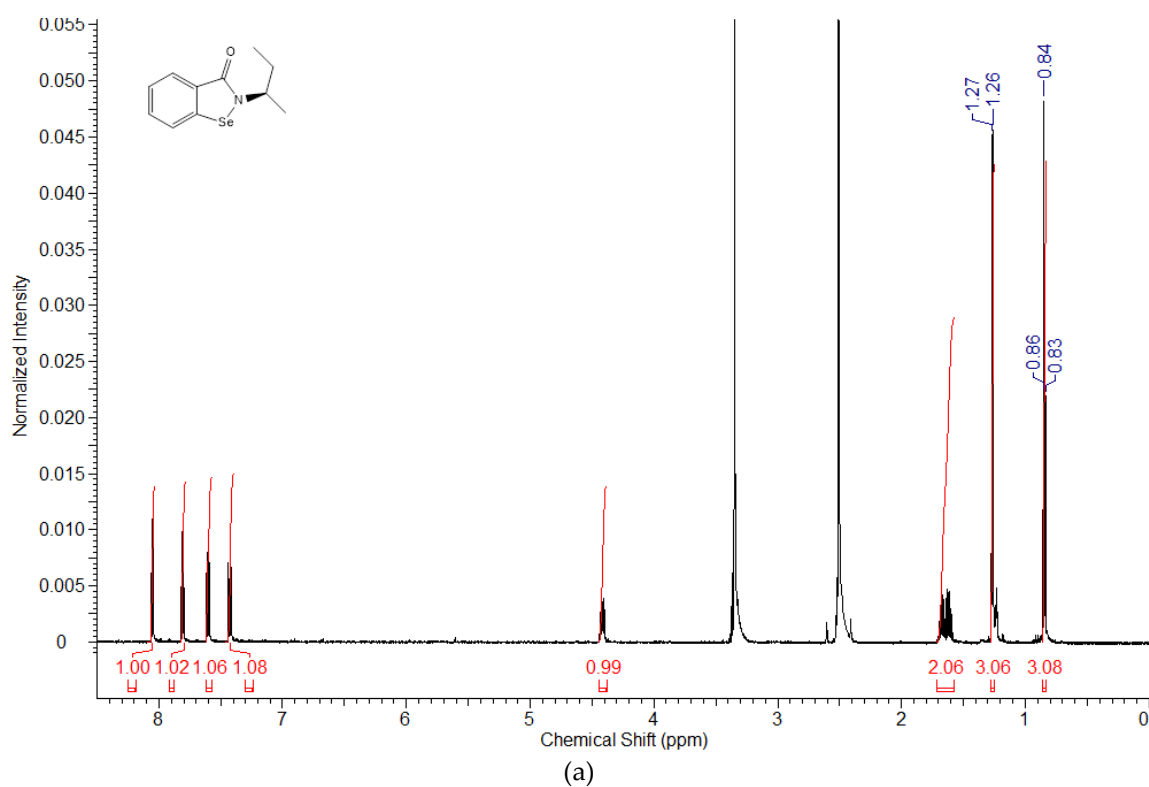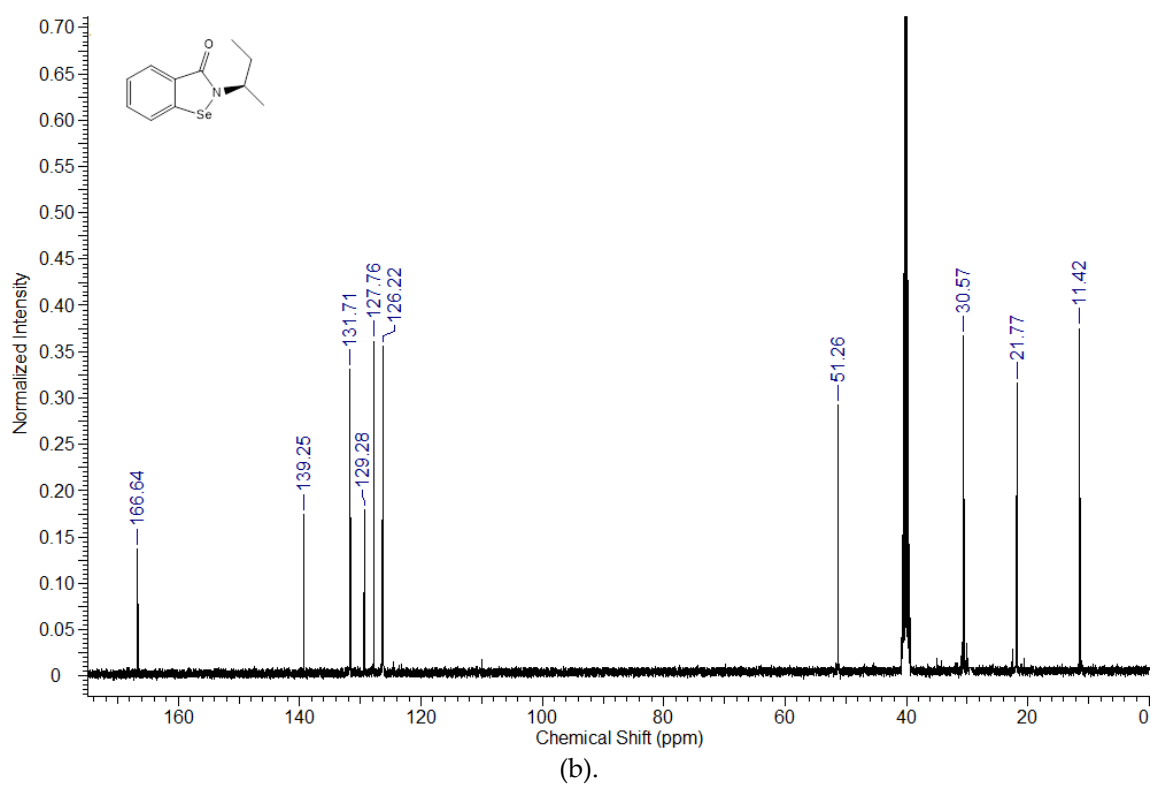

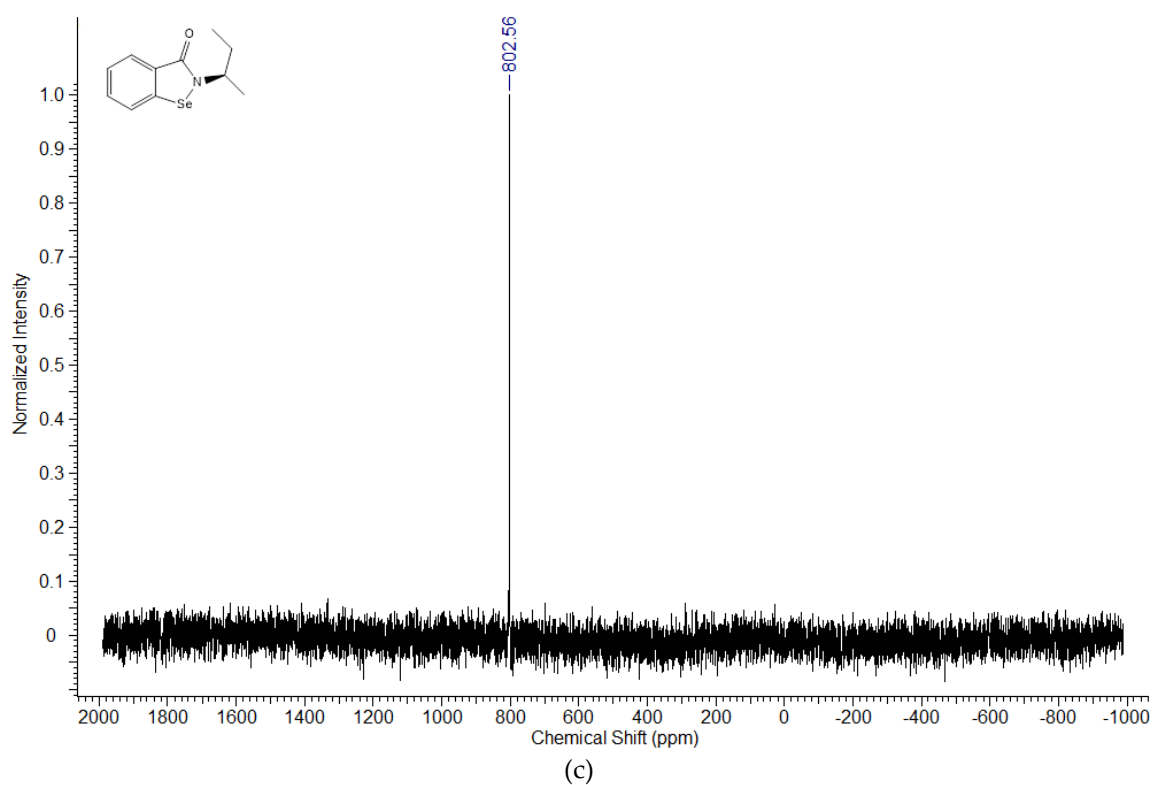

**Figure S2.** (a)  $^1\text{H}$  NMR, (b)  $^{13}\text{C}$  NMR, and (c)  $^{77}\text{Se}$  NMR spectra of *N*-[(*R*)-(-)-*sec*-butyl]-1,2-benziselenazol-3(2*H*)-one **19a**.

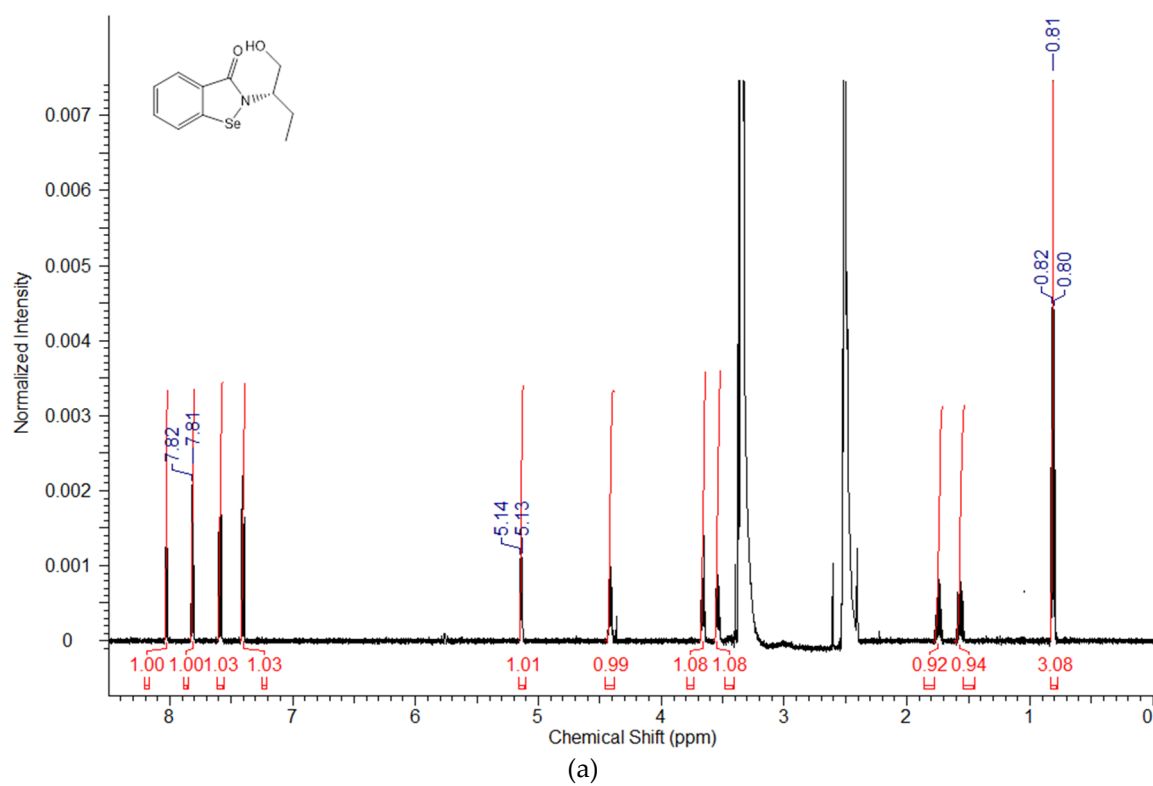

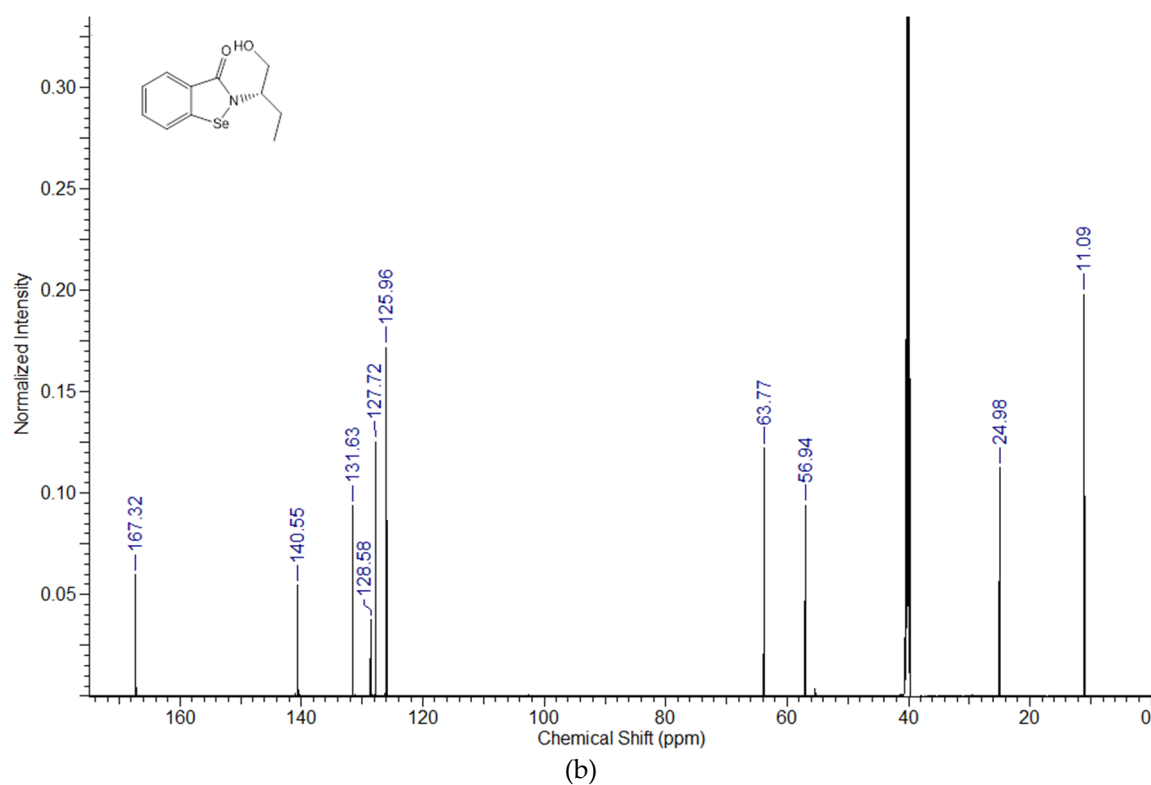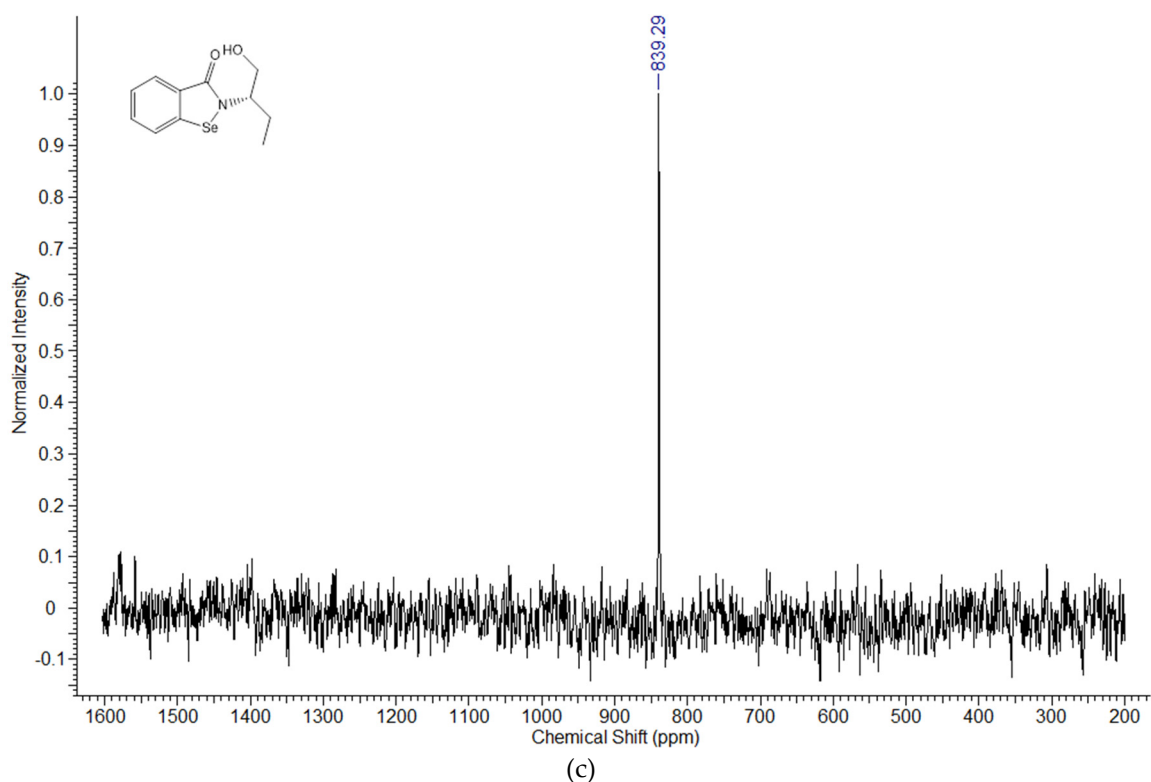

**Figure S3.** (a) <sup>1</sup>H NMR, (b) <sup>13</sup>C NMR, and (c) <sup>77</sup>Se NMR spectra of *N*-[(*S*)-(+)-1-hydroxy-2-butanyl]-1,2-benzisoselenazol-3(2*H*)-one **20a**.

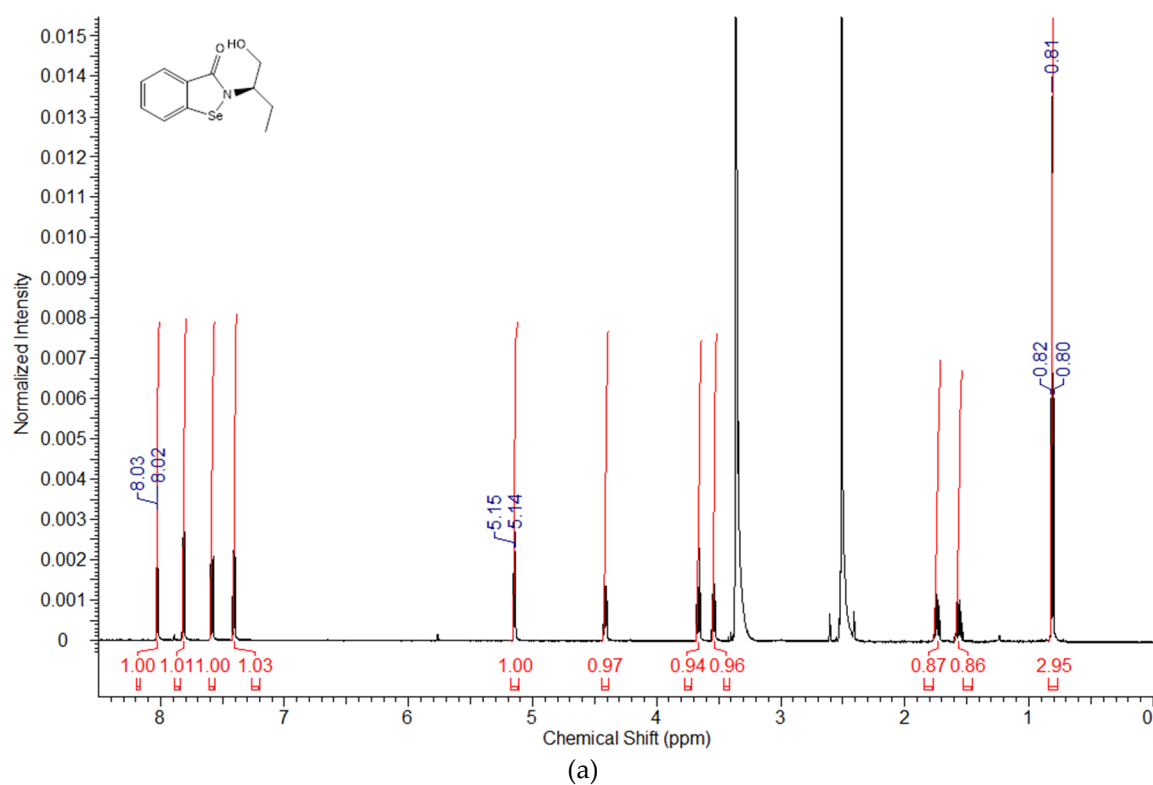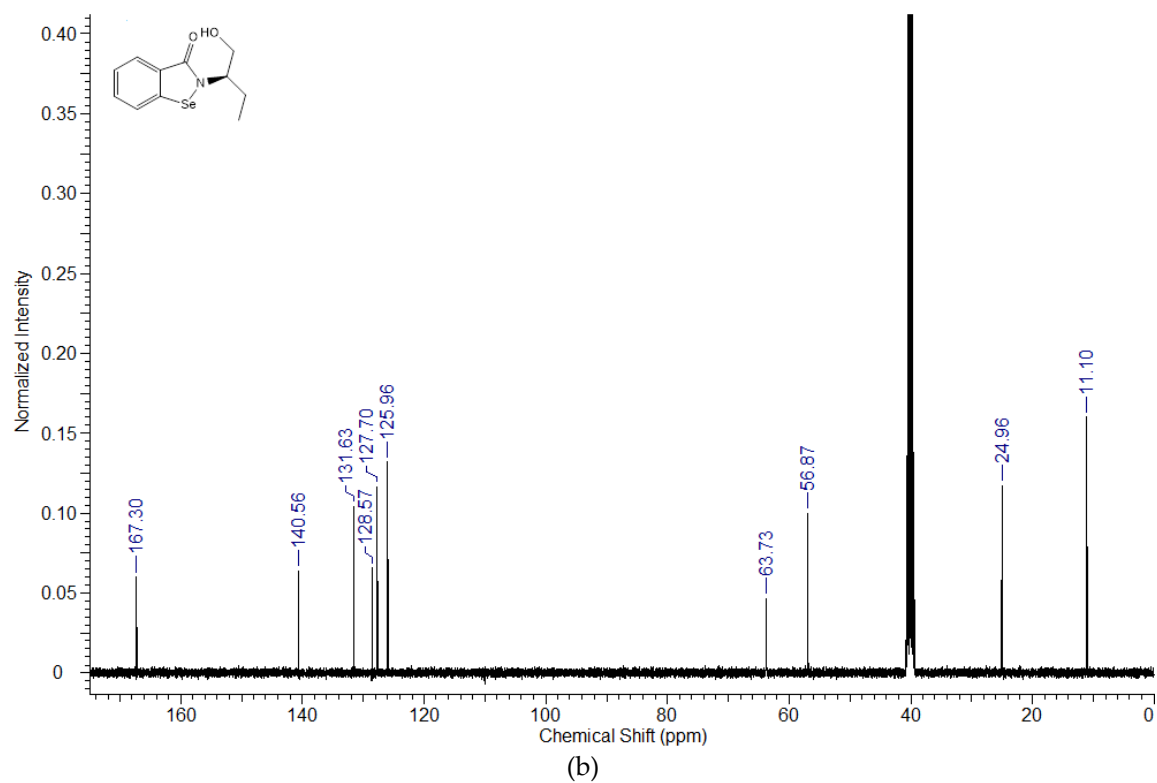

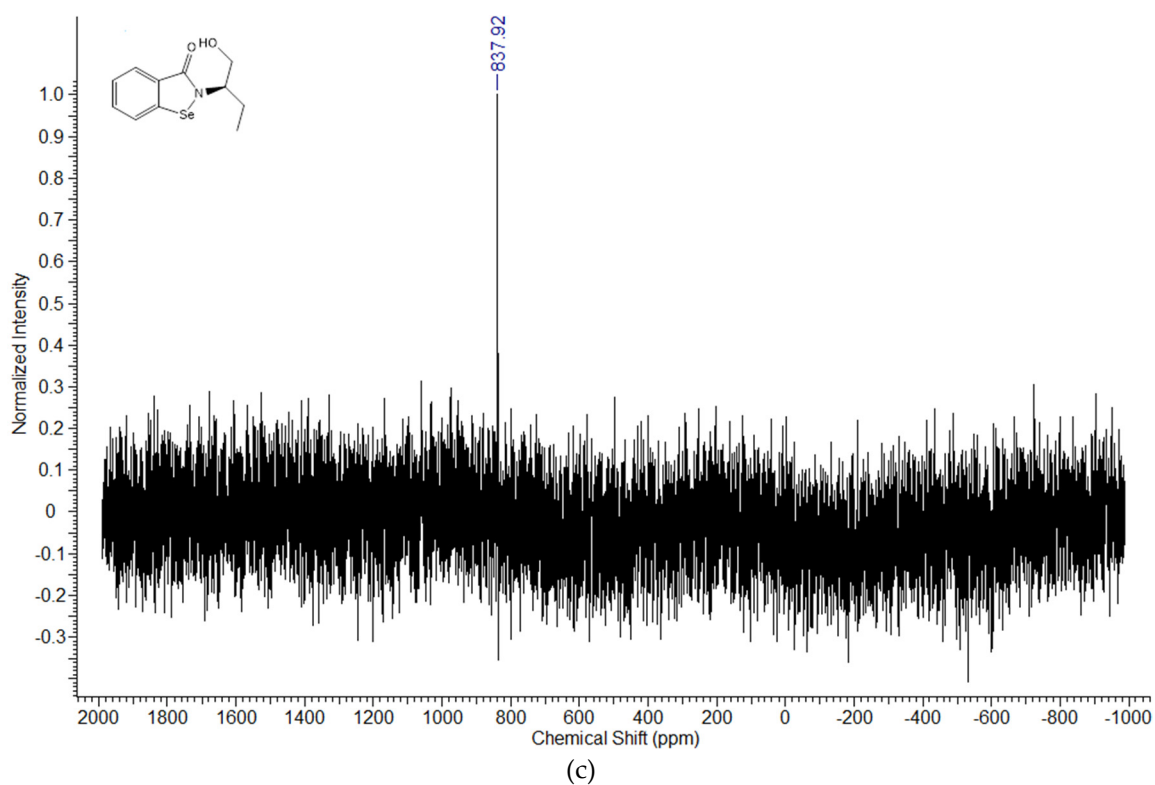

**Figure S4.** (a)  $^1\text{H}$  NMR, (b)  $^{13}\text{C}$  NMR, and (c)  $^{77}\text{Se}$  NMR spectra of *N*-[(*R*)-(-)-1-hydroxy-2-butanyl]-1,2-benzisoselenazol-3(2*H*)-one **21a**.

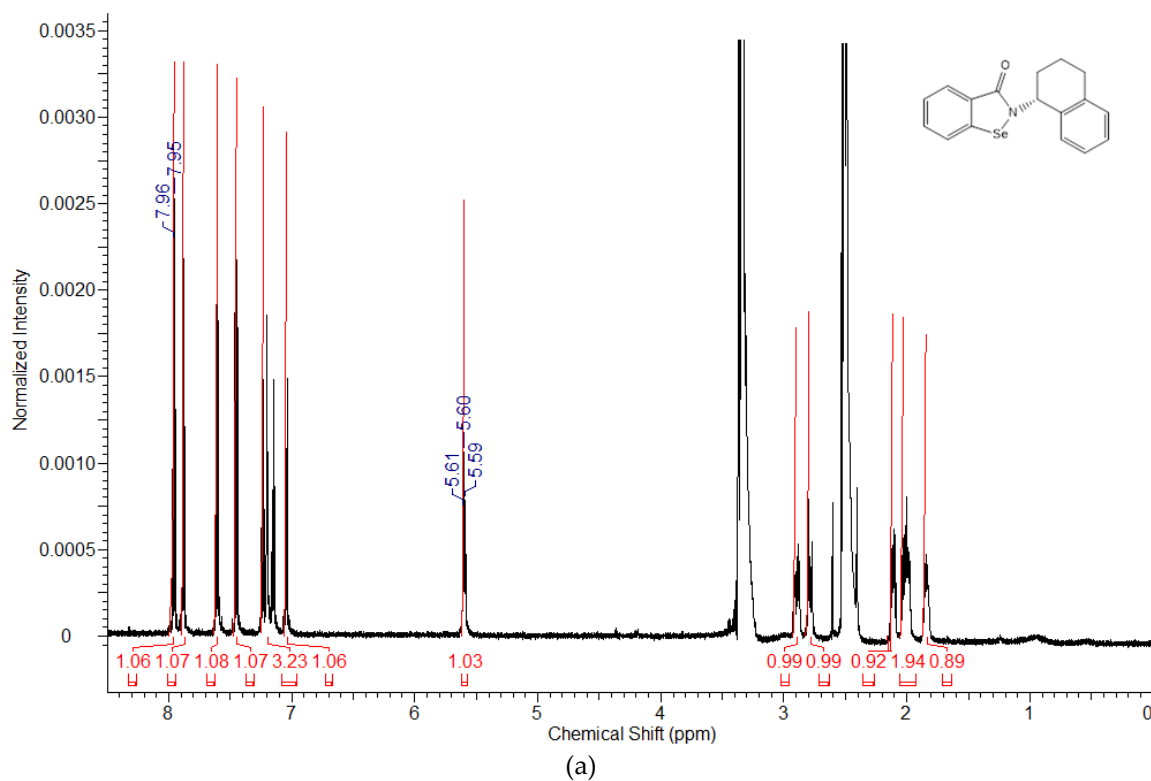

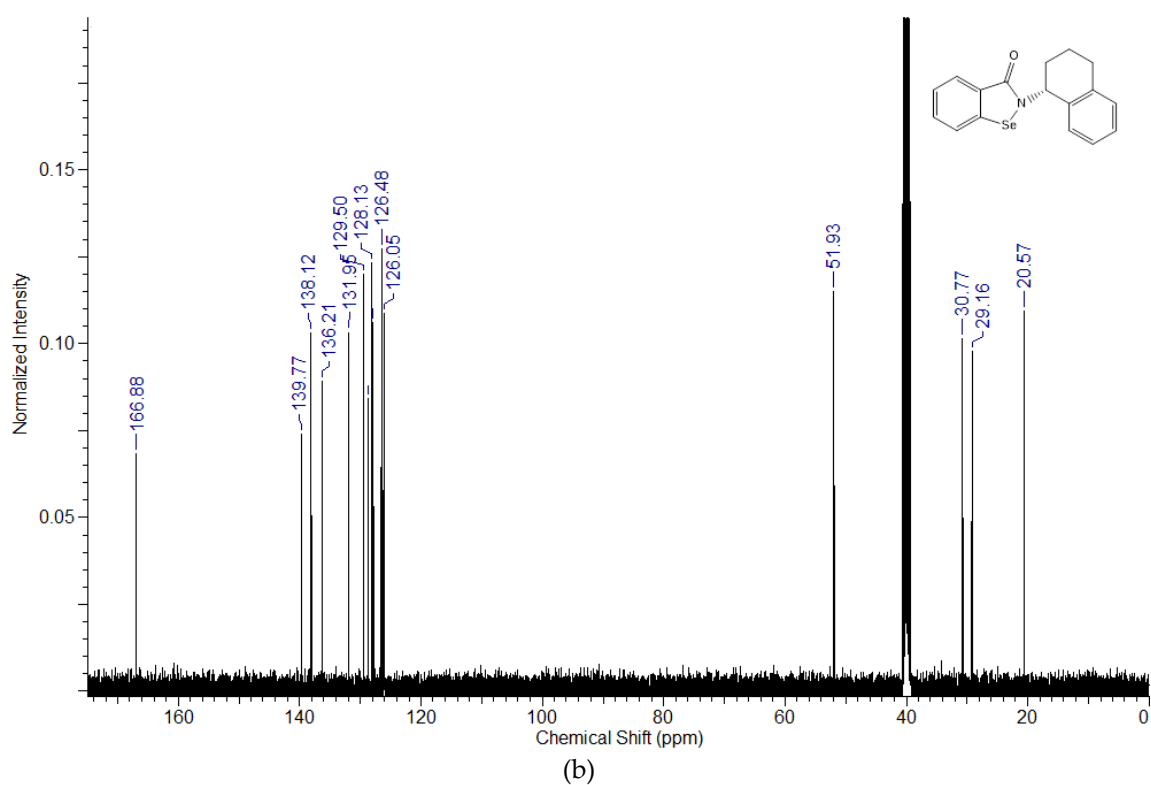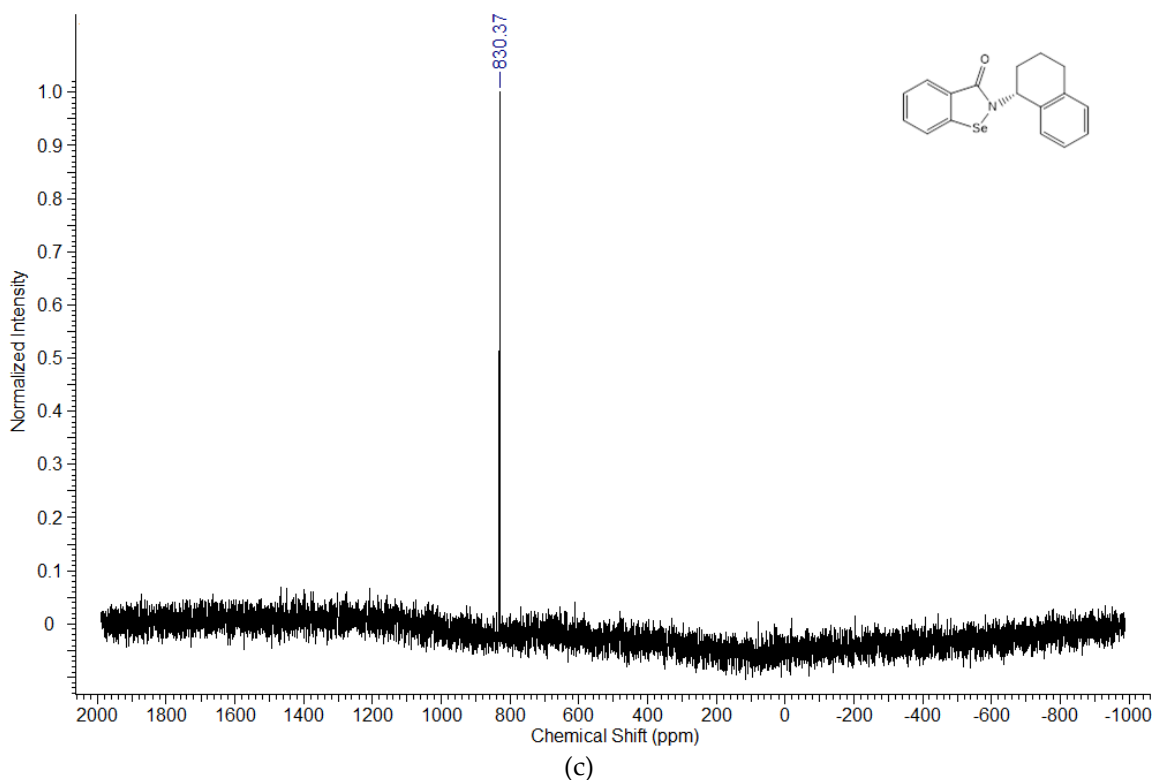

**Figure S5.** (a) <sup>1</sup>H NMR, (b) <sup>13</sup>C NMR, and (c) <sup>77</sup>Se NMR spectra of *N*-[(*R*)-(-)-1,2,3,4-tetrahydro-1-naphthyl]-1,2-benzisoselenazol-3(2*H*)-one **22a**.



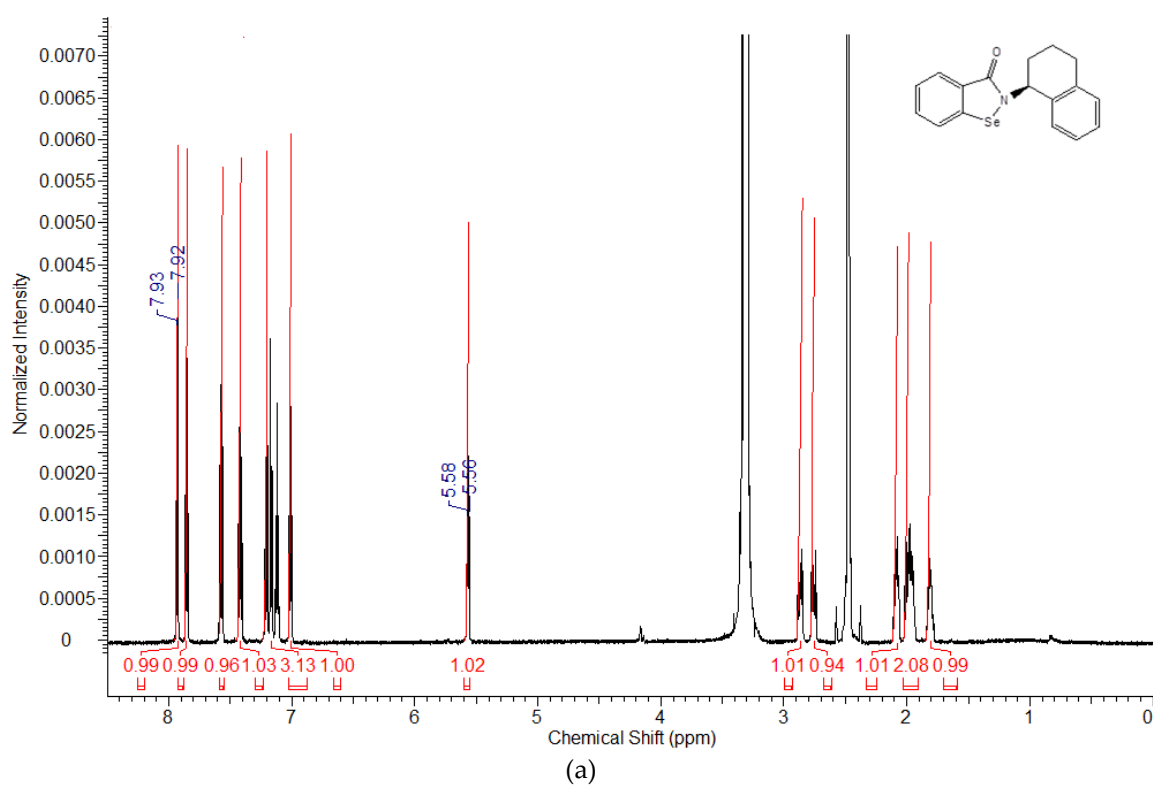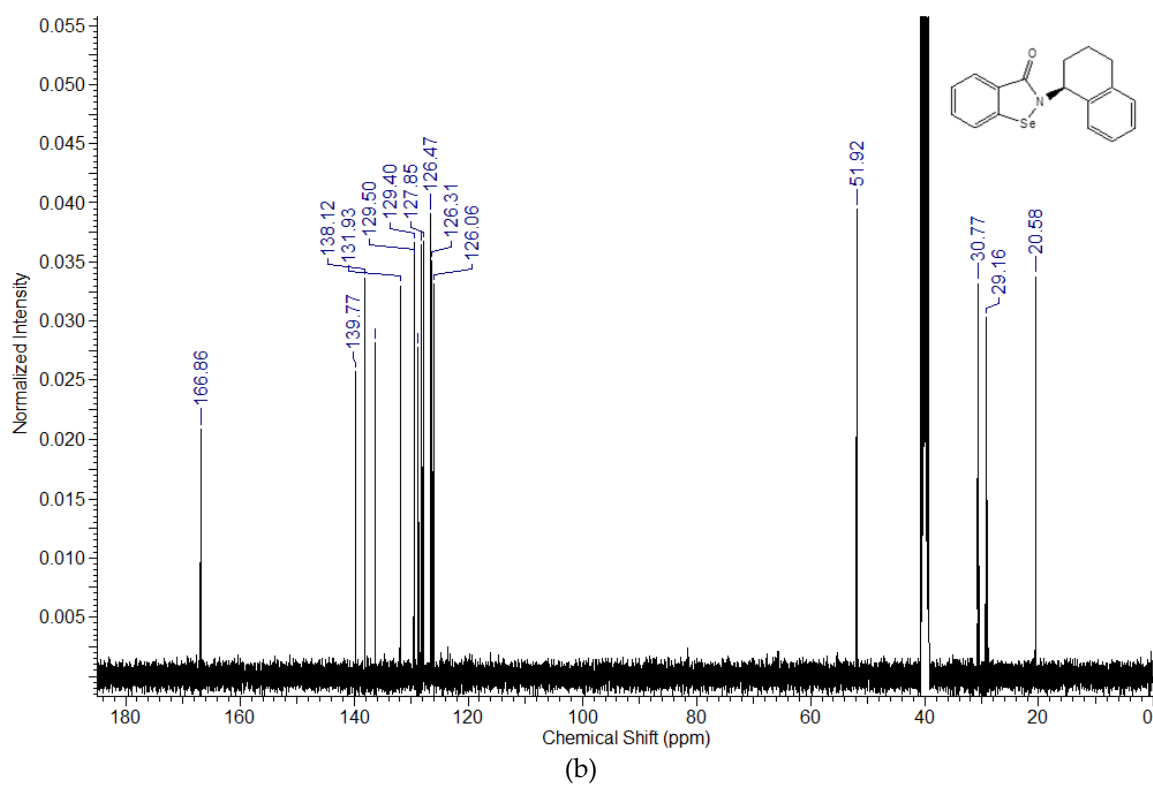

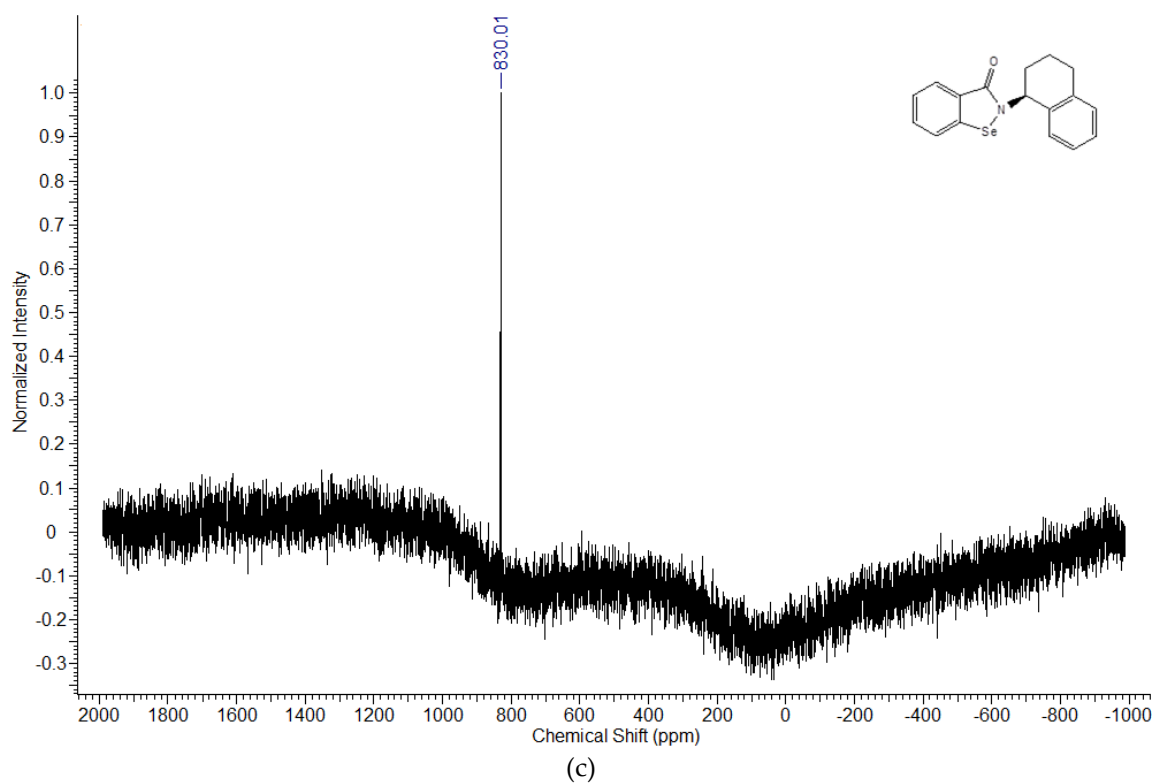

**Figure S6.** (a)  $^1\text{H}$  NMR, (b)  $^{13}\text{C}$  NMR, and (c)  $^{77}\text{Se}$  NMR spectra of *N*-[(*S*)-(+)-1,2,3,4-tetrahydro-1-naphthyl]-1,2-benzisoselenazol-3(2*H*)-one **23a**.

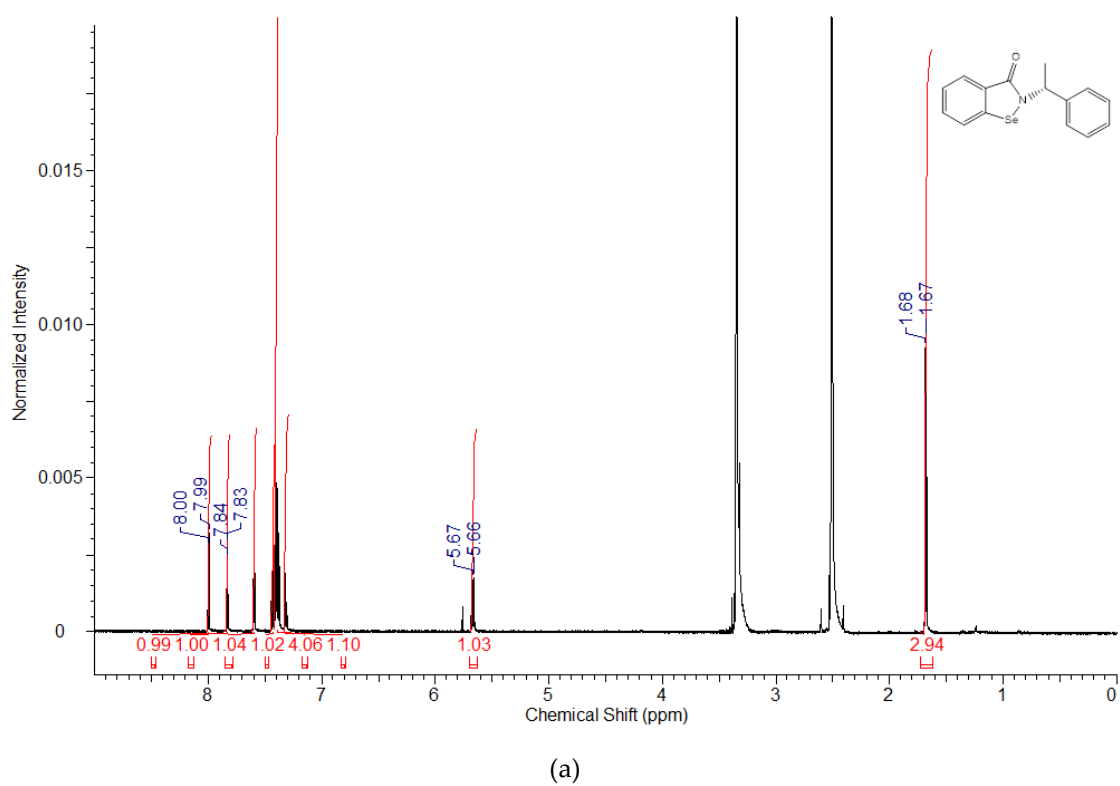

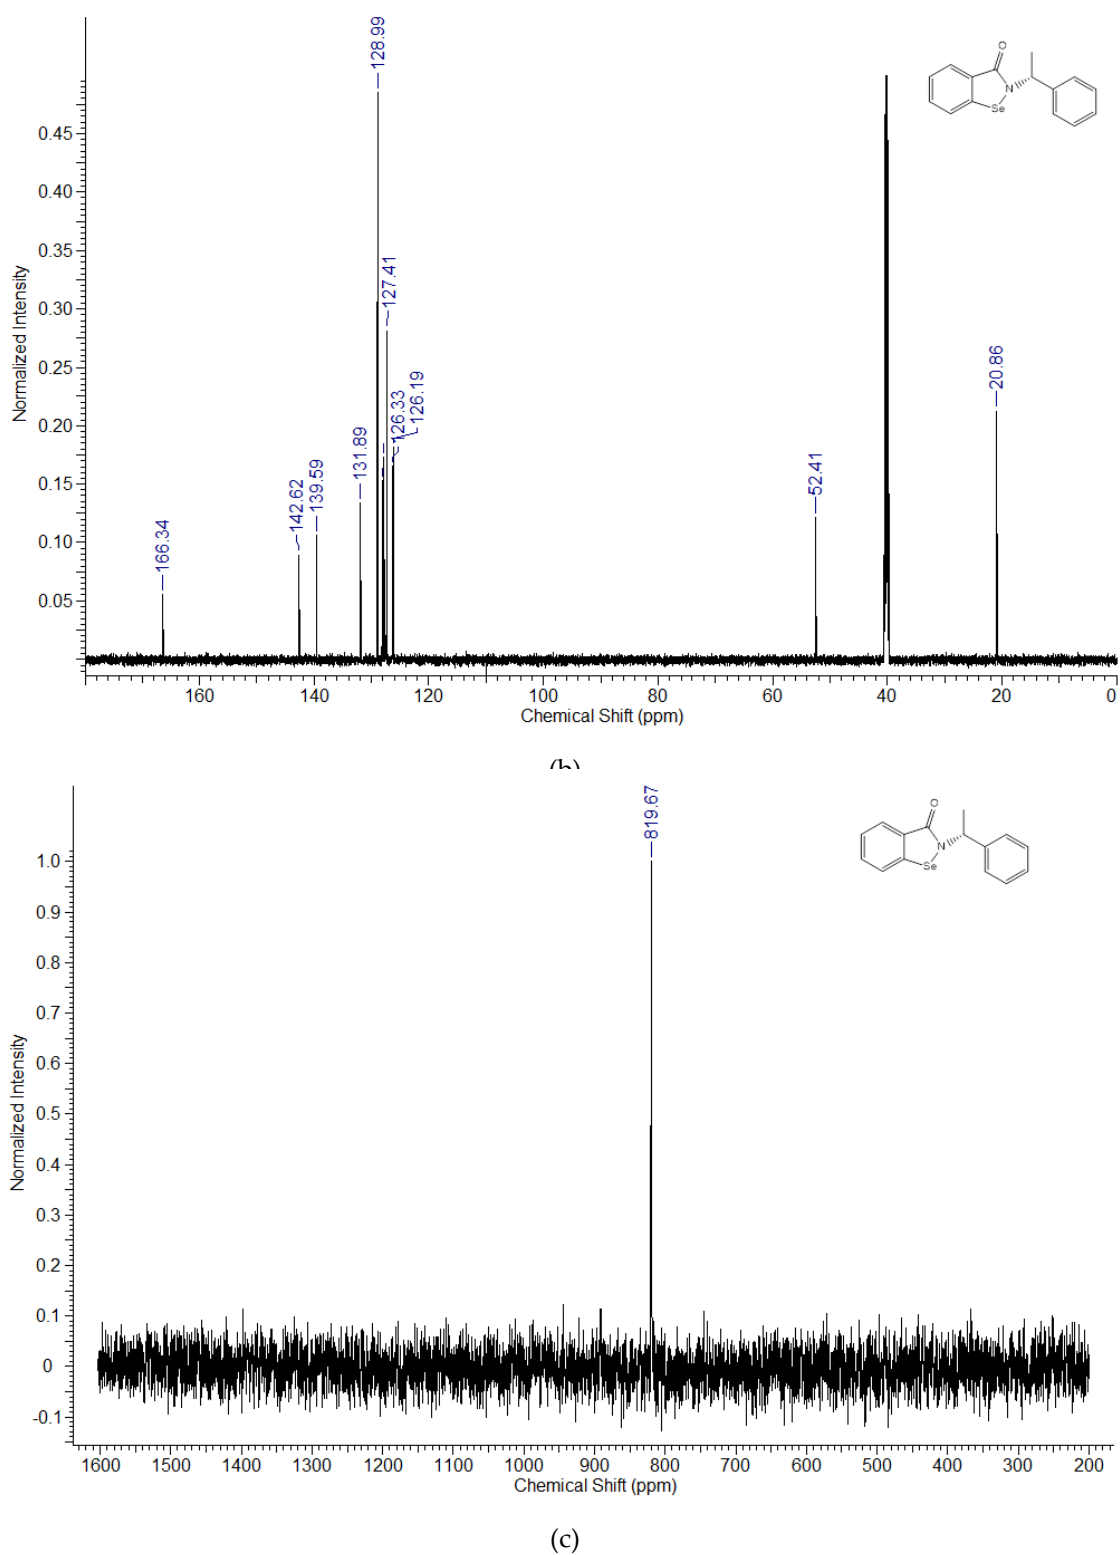

**Figure S7.** (a)  $^1\text{H}$  NMR, (b)  $^{13}\text{C}$  NMR, and (c)  $^{77}\text{Se}$  NMR spectra of *N*-[(*R*)-(+)- $\alpha$ -methylbenzyl]-1,2-benzisoselenazol-3(2*H*)-one **24a**.

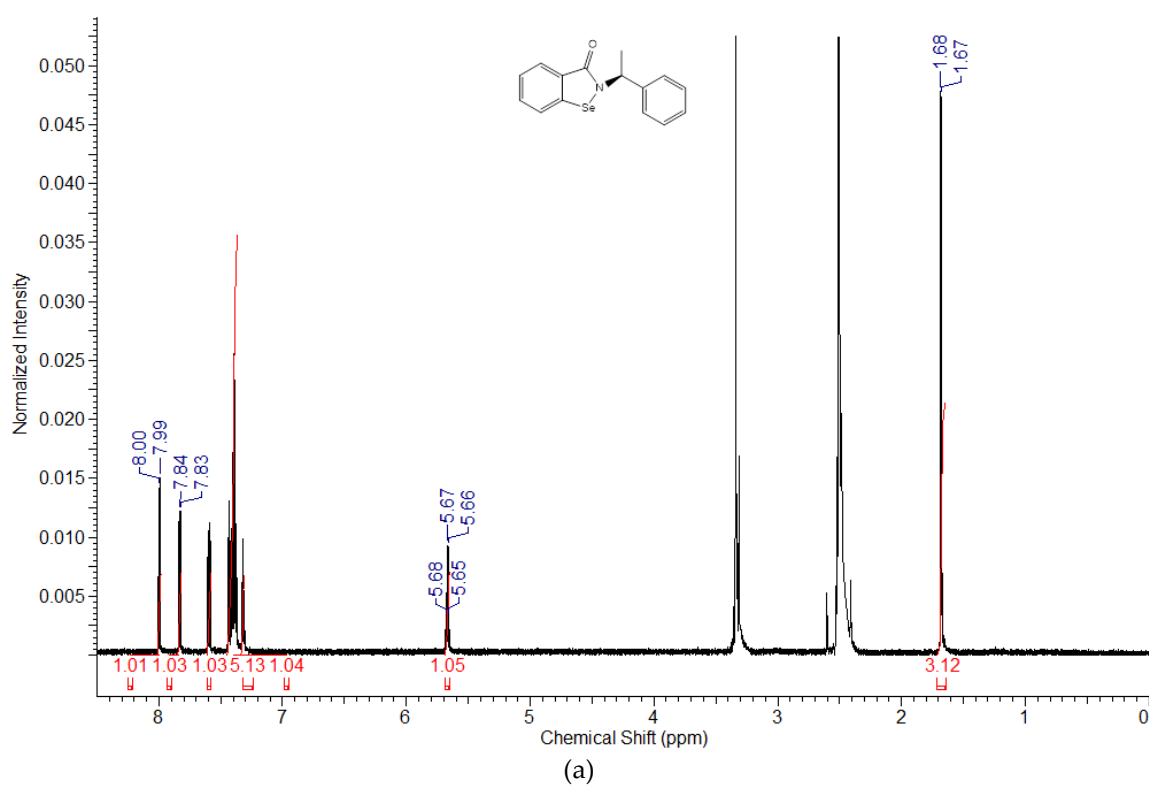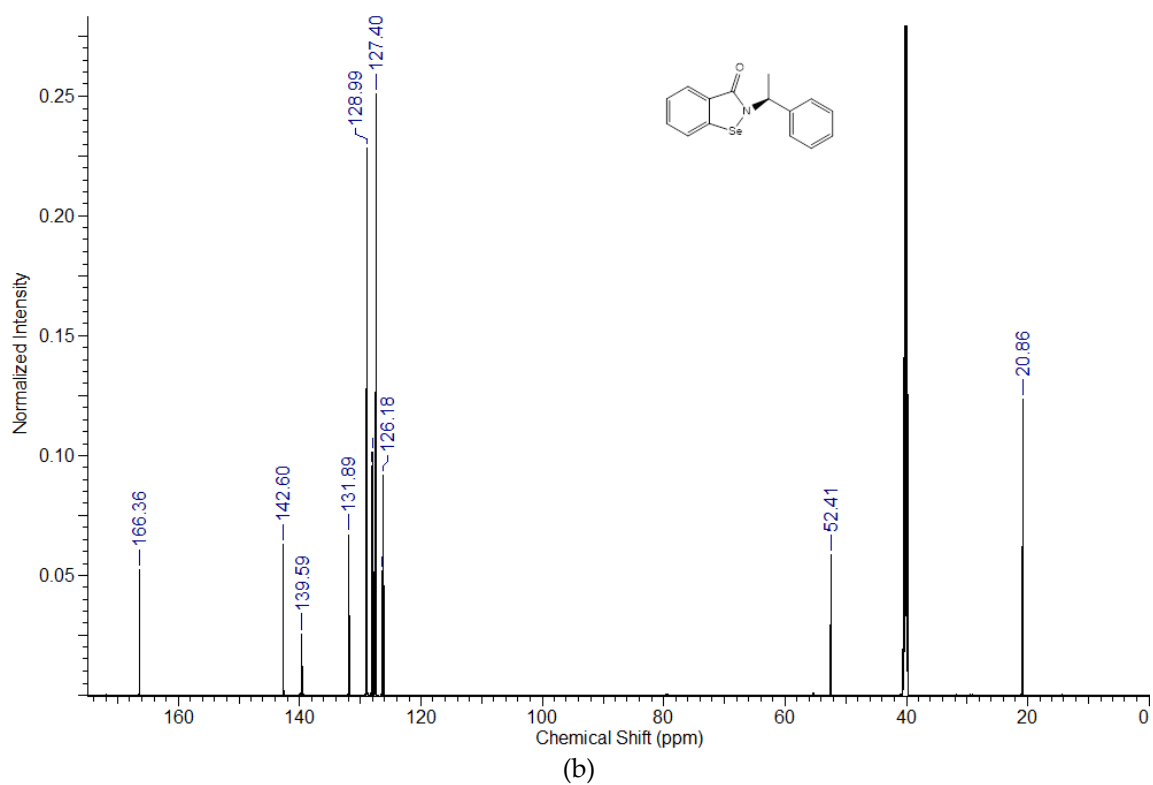

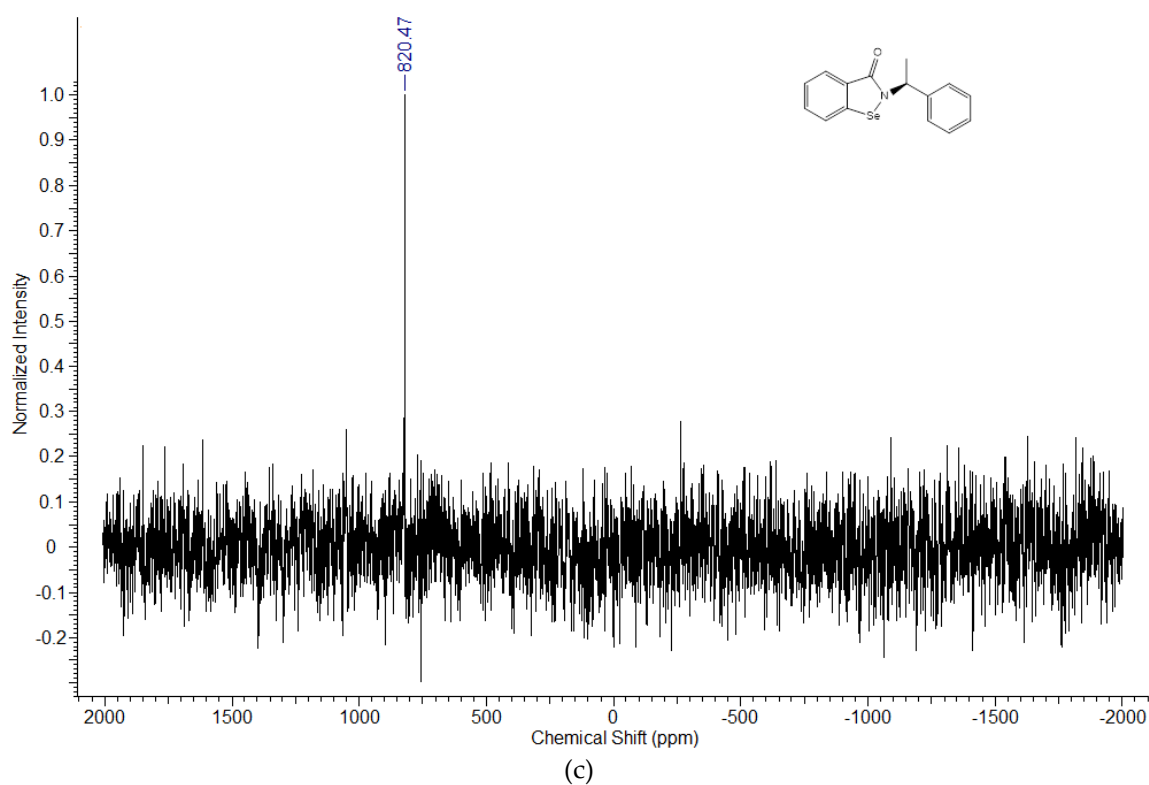

**Figure S8.** (a)  $^1\text{H}$  NMR, (b)  $^{13}\text{C}$  NMR, and (c)  $^{77}\text{Se}$  NMR spectra of *N*-[(*S*)-(-)- $\alpha$ -methylbenzyl]-1,2-benzisoselenazol-3(2*H*)-one **25a**.

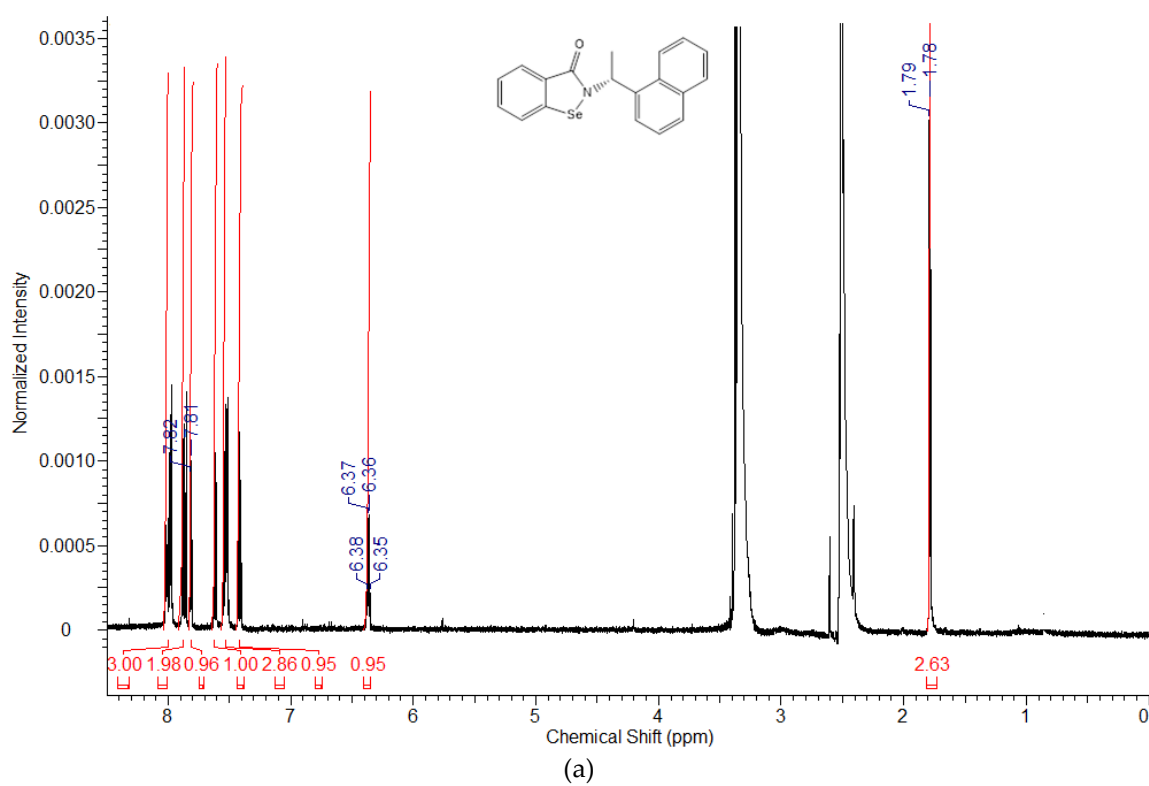

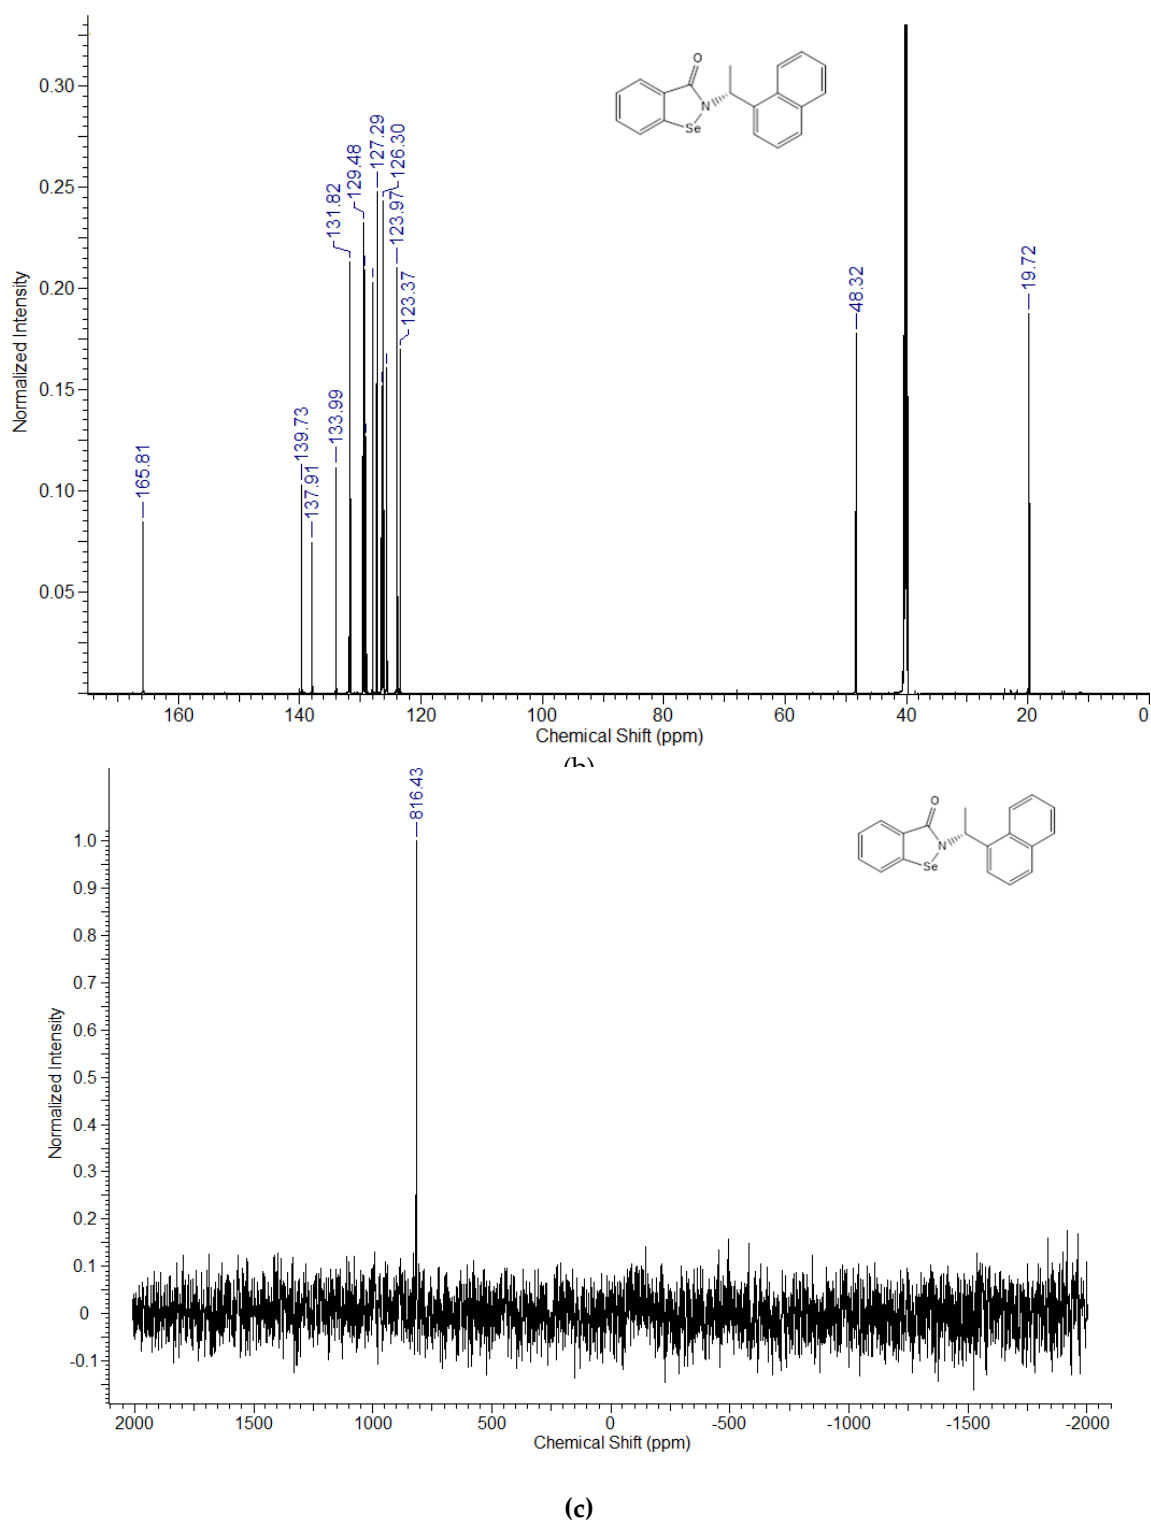

**Figure S9.** (a)  $^1\text{H}$  NMR, (b)  $^{13}\text{C}$  NMR, and (c)  $^{77}\text{Se}$  NMR spectra of *N*-[(*R*)-(-)-1-(1-naphthyl)ethyl]-1,2-benzisoselenazol-3(2*H*)-one **26a**

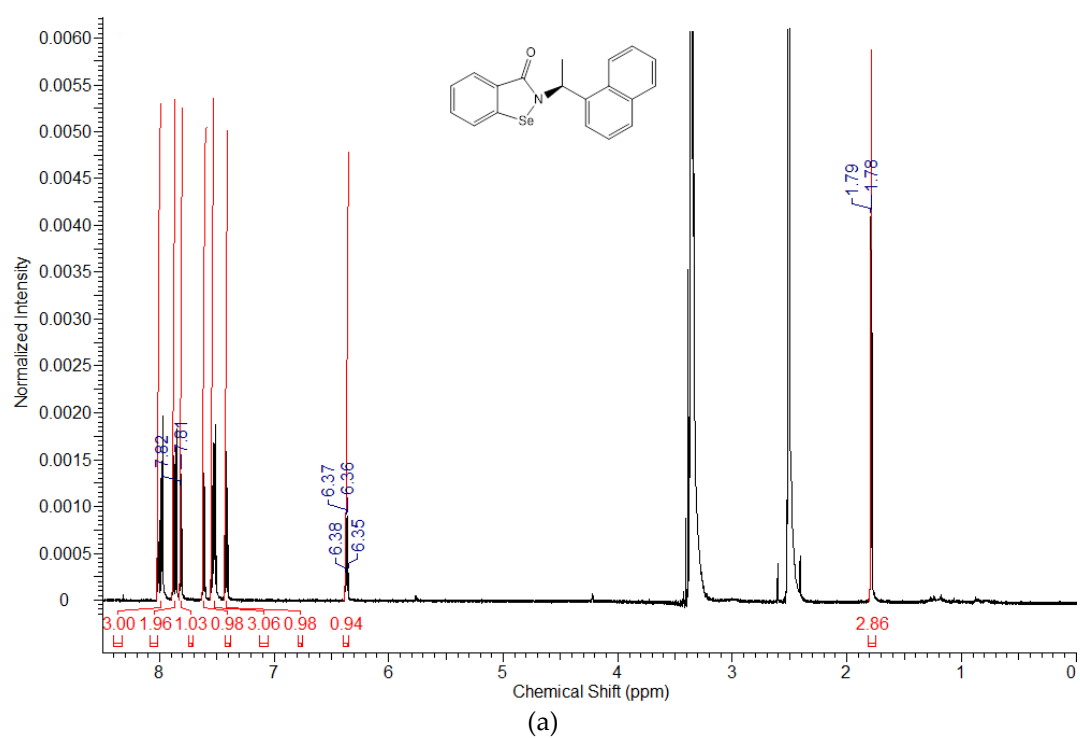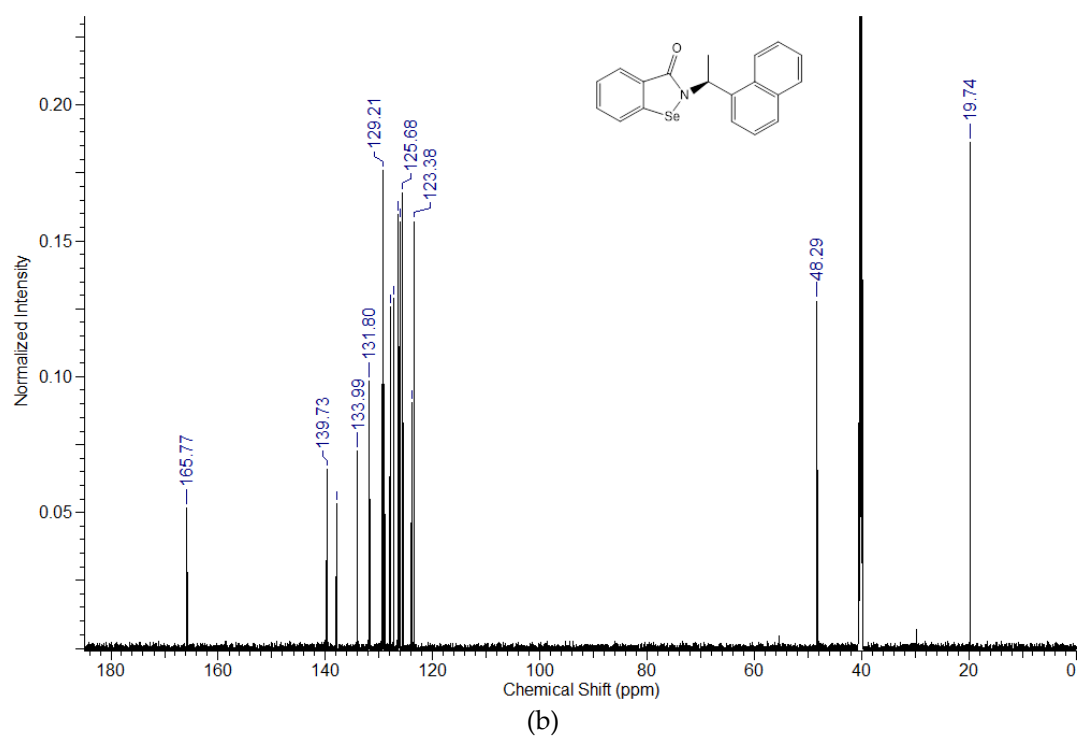

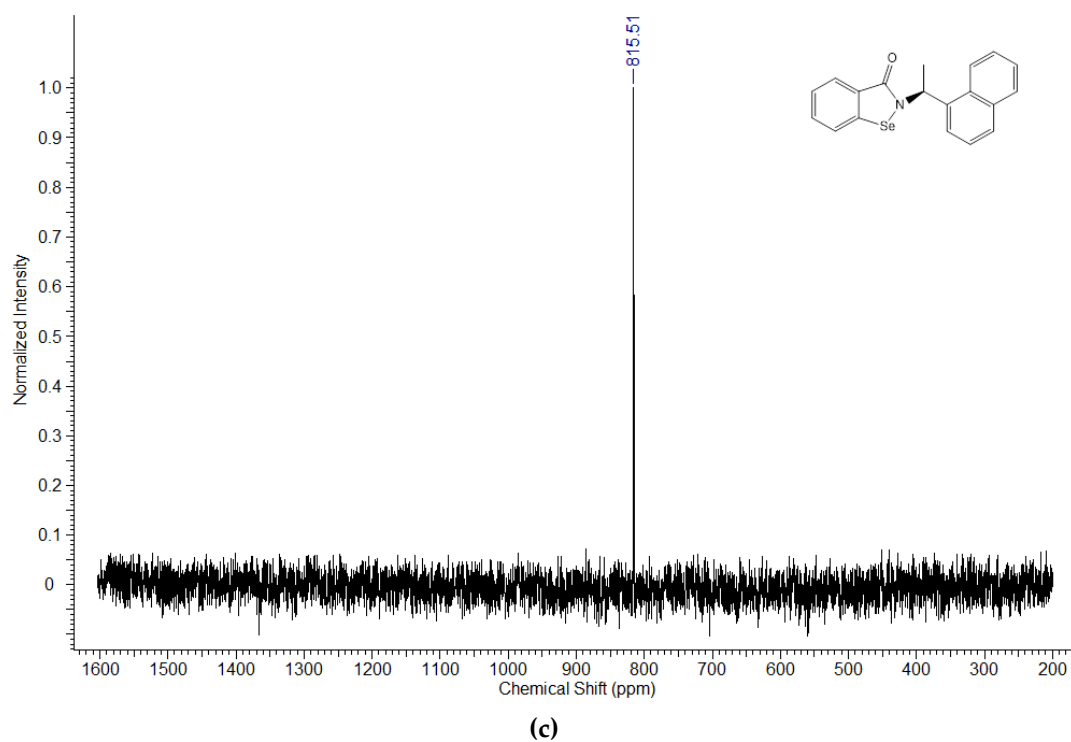

**Figure S10.** (a)  $^1\text{H}$  NMR, (b)  $^{13}\text{C}$  NMR, and (c)  $^{77}\text{Se}$  NMR spectra of *N*-[(*R*)-(+)-1-(1-naphthyl)ethyl]-1,2-benzisoselenazol-3(2*H*)-one **27a**.

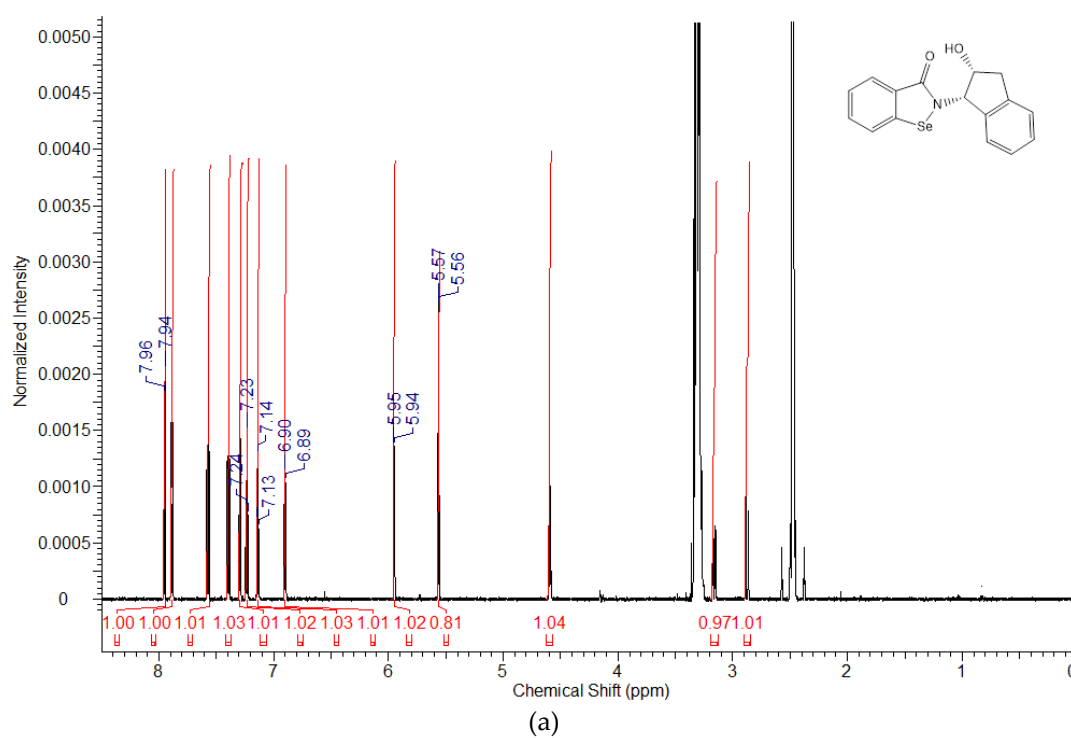



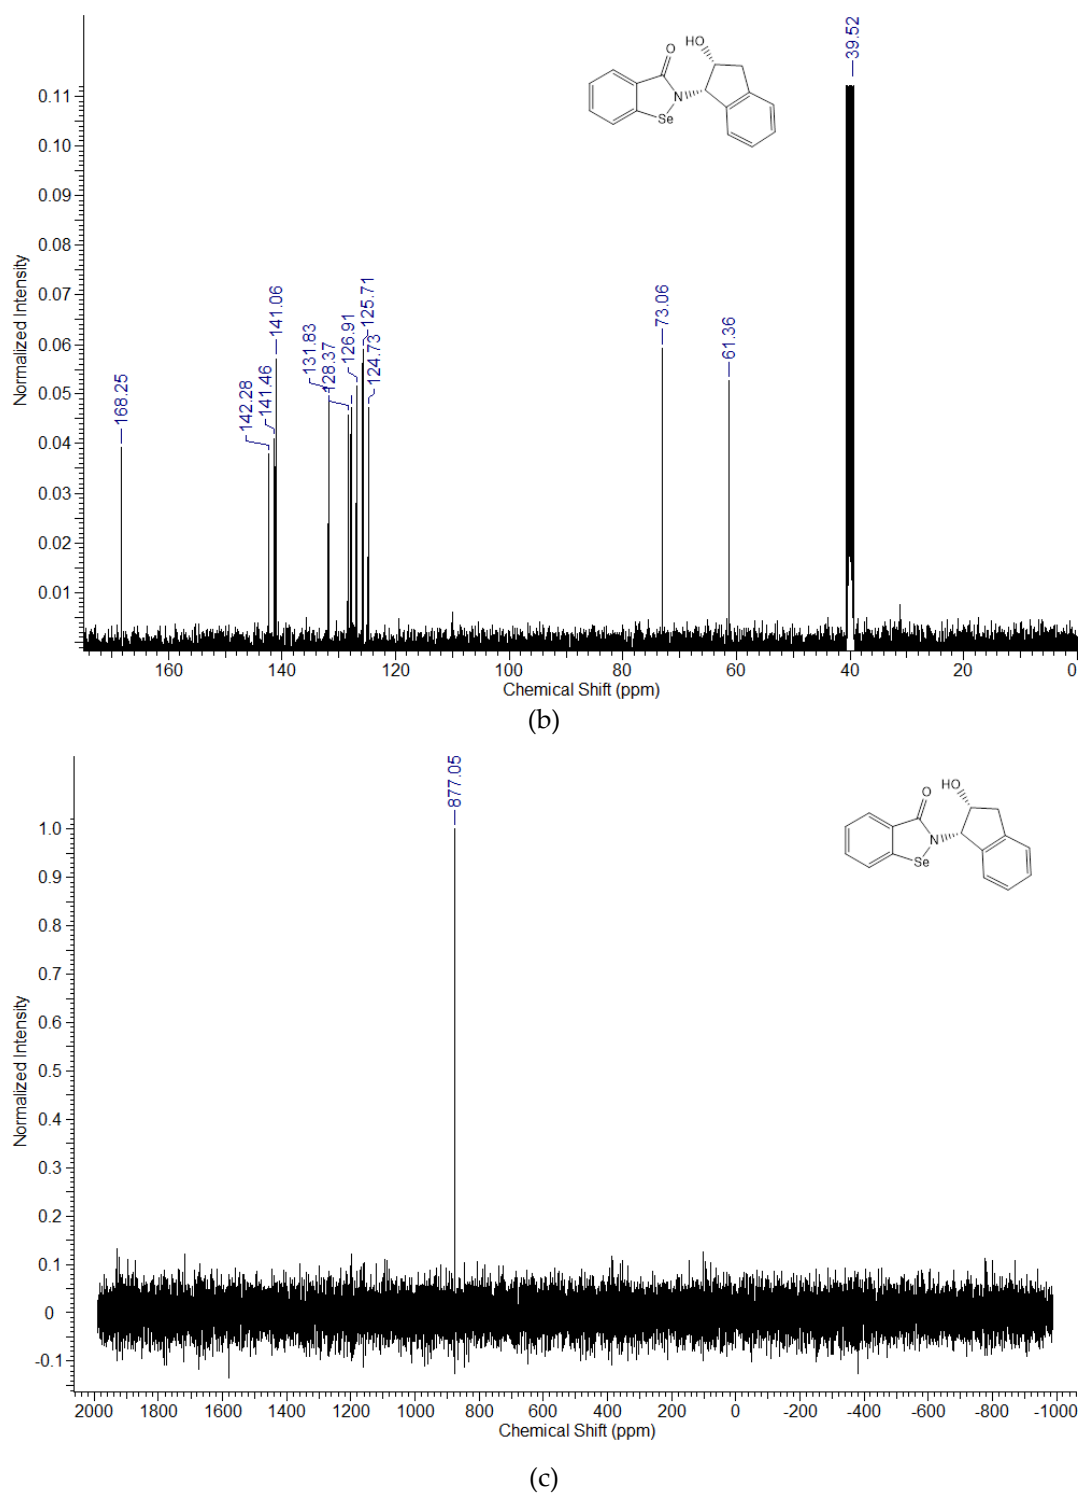

**Figure S11.** (a) <sup>1</sup>H NMR, (b) <sup>13</sup>C NMR, and (c) <sup>77</sup>Se NMR spectra of *N*-[(1*S*,2*R*)-(-)-*cis*-2-hydroxy-1-indanyl]-1,2-benzisoselenazol-3(2*H*)-one **28a**.

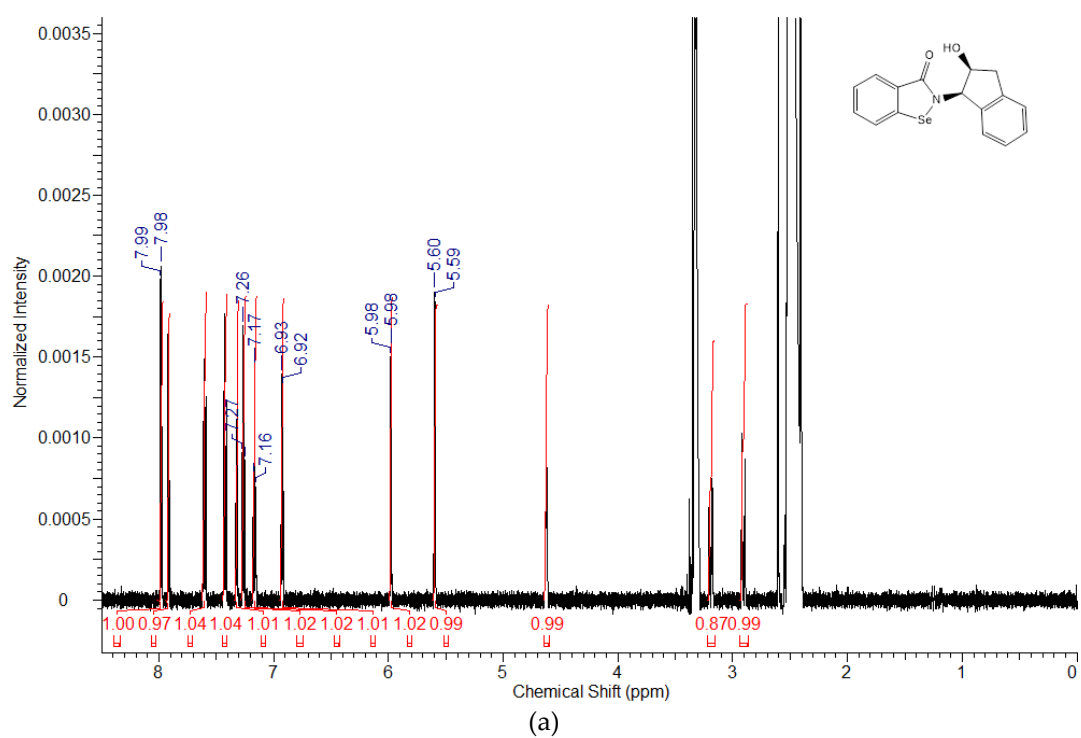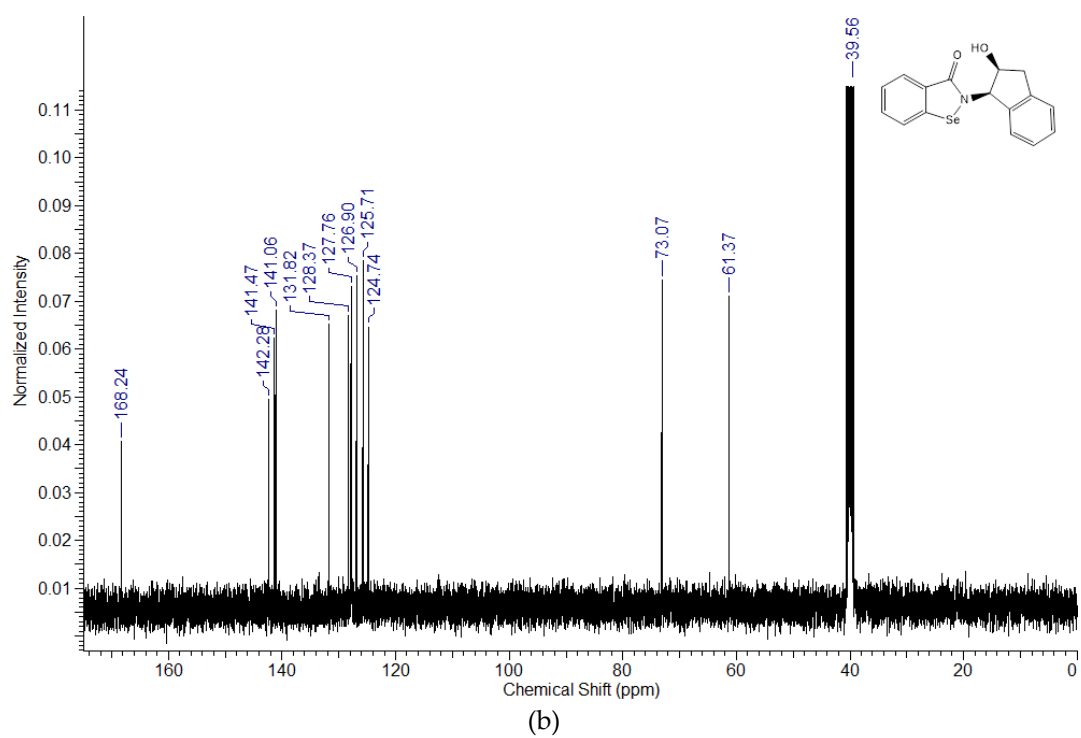

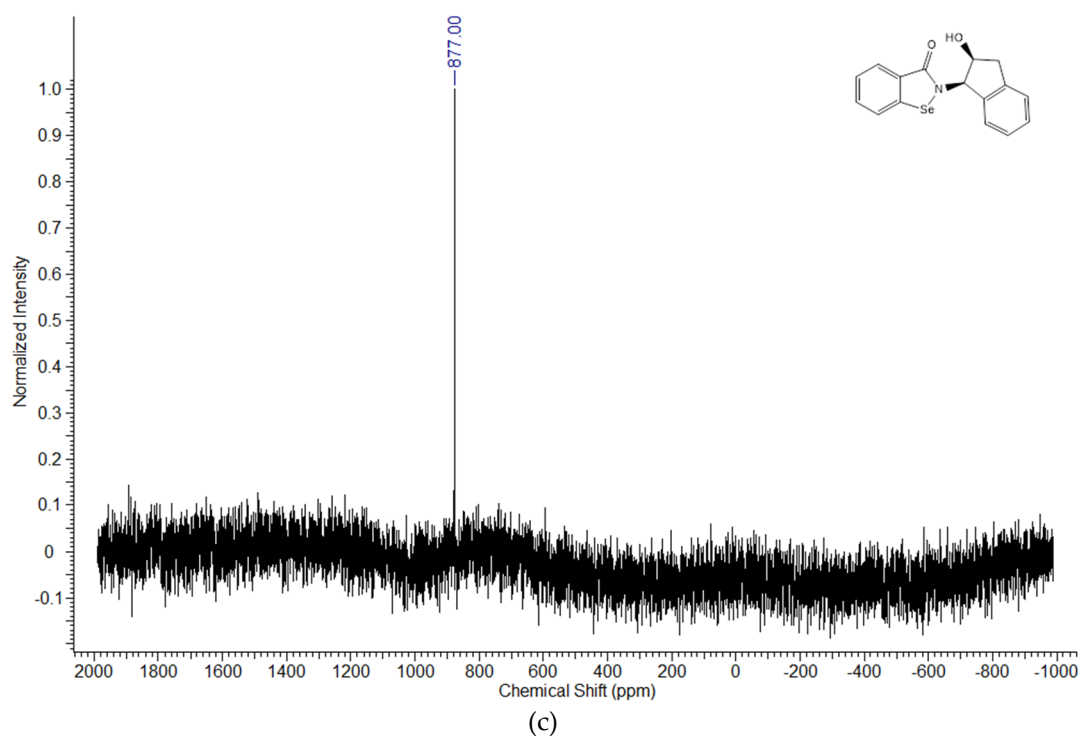

**Figure S12.** (a)  $^1\text{H}$  NMR, (b)  $^{13}\text{C}$  NMR, and (c)  $^{77}\text{Se}$  NMR spectra of *N*-[*(1R,2S)*-(+)-*cis*-2-hydroxy-1-indanyl]-1,2-benzisoselenazol-3(2*H*)-one **29a**.

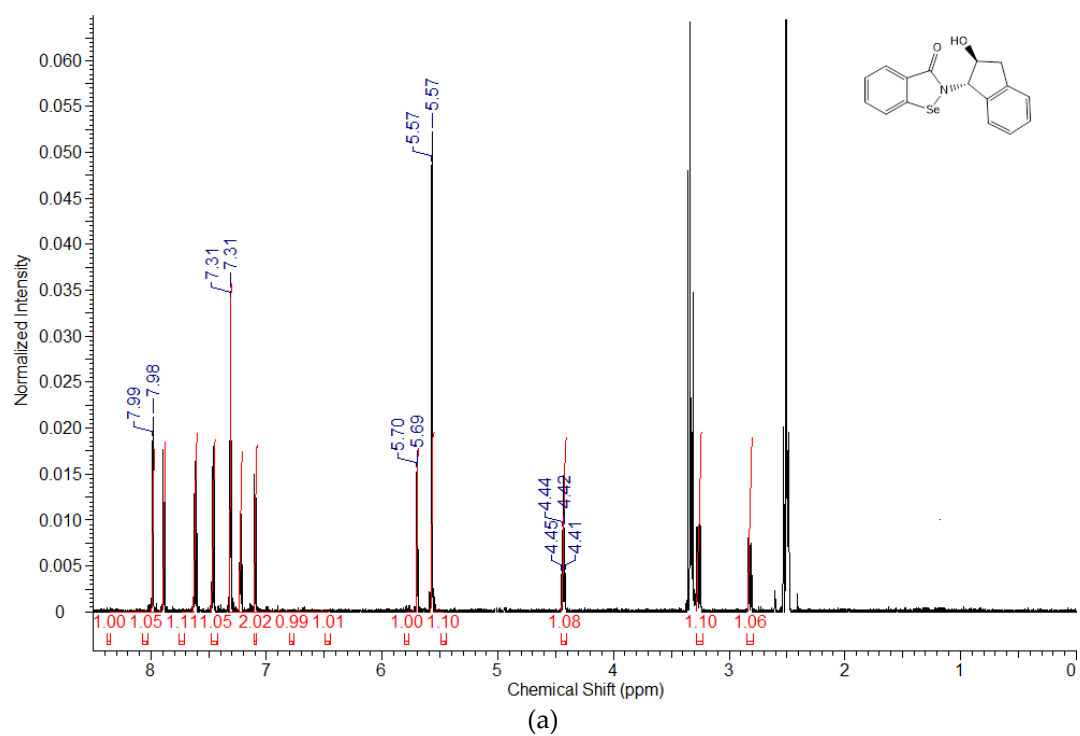

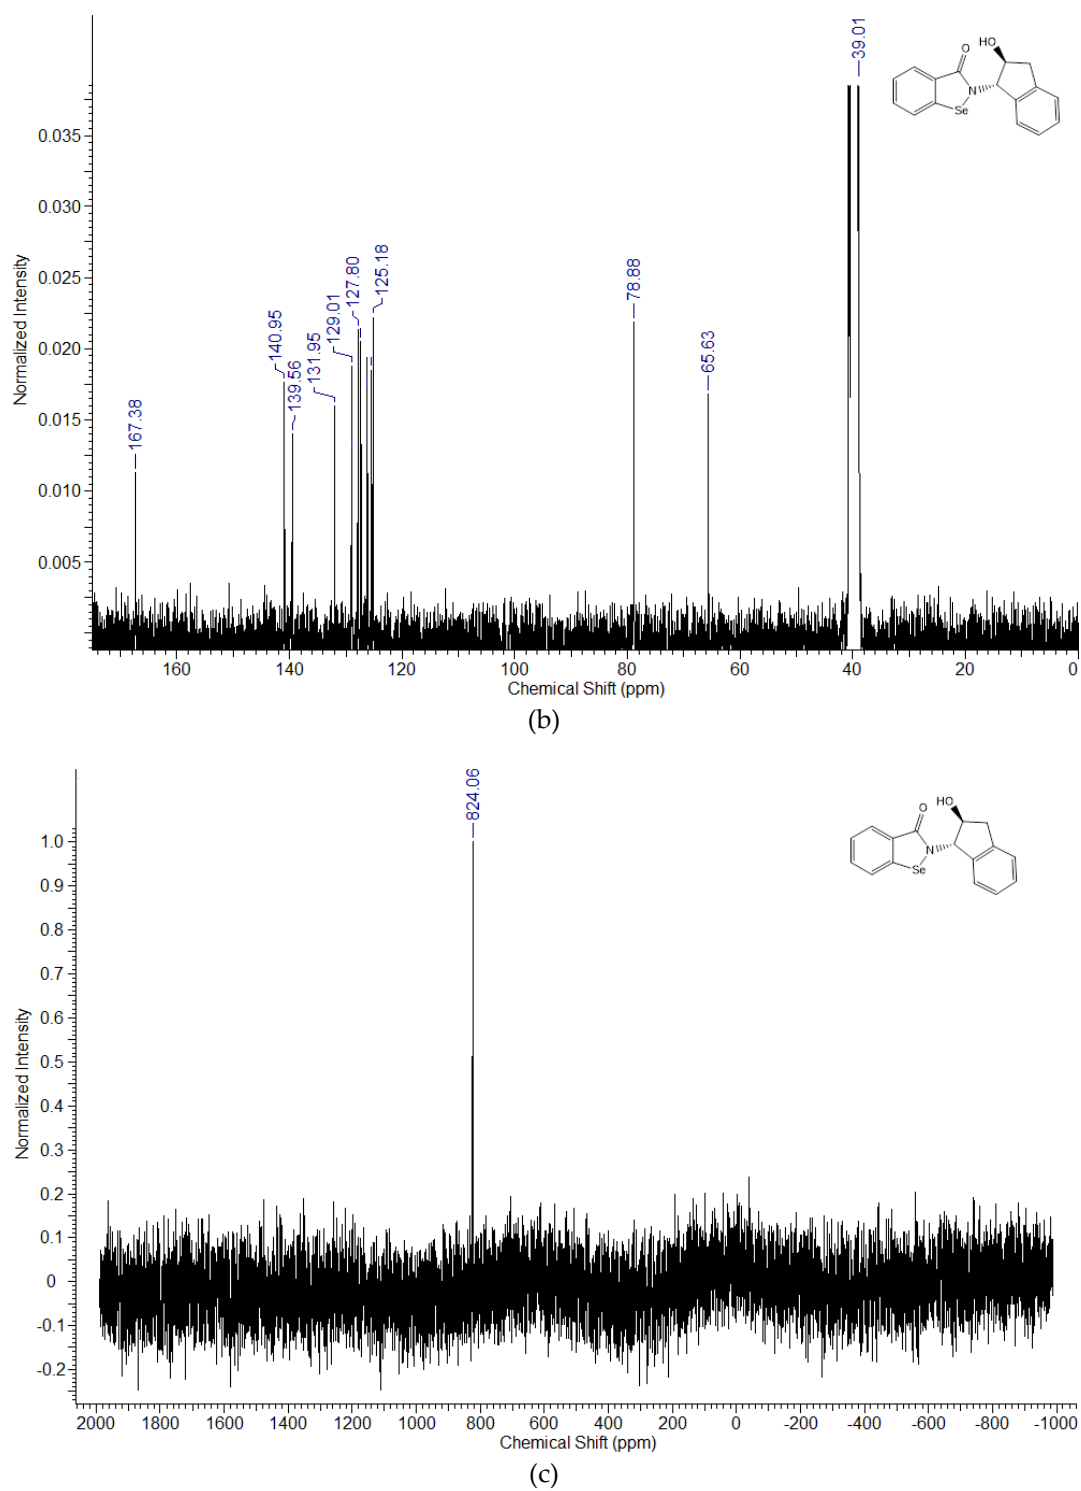

**Figure S13.** (a) <sup>1</sup>H NMR, (b) <sup>13</sup>C NMR, and (c) <sup>77</sup>Se NMR spectra of *N*-[(1*S*,2*S*)-(+)-*trans*-2-hydroxy-1-indanyl]-1,2-benzisoselenazol-3(2*H*)-one **30a**

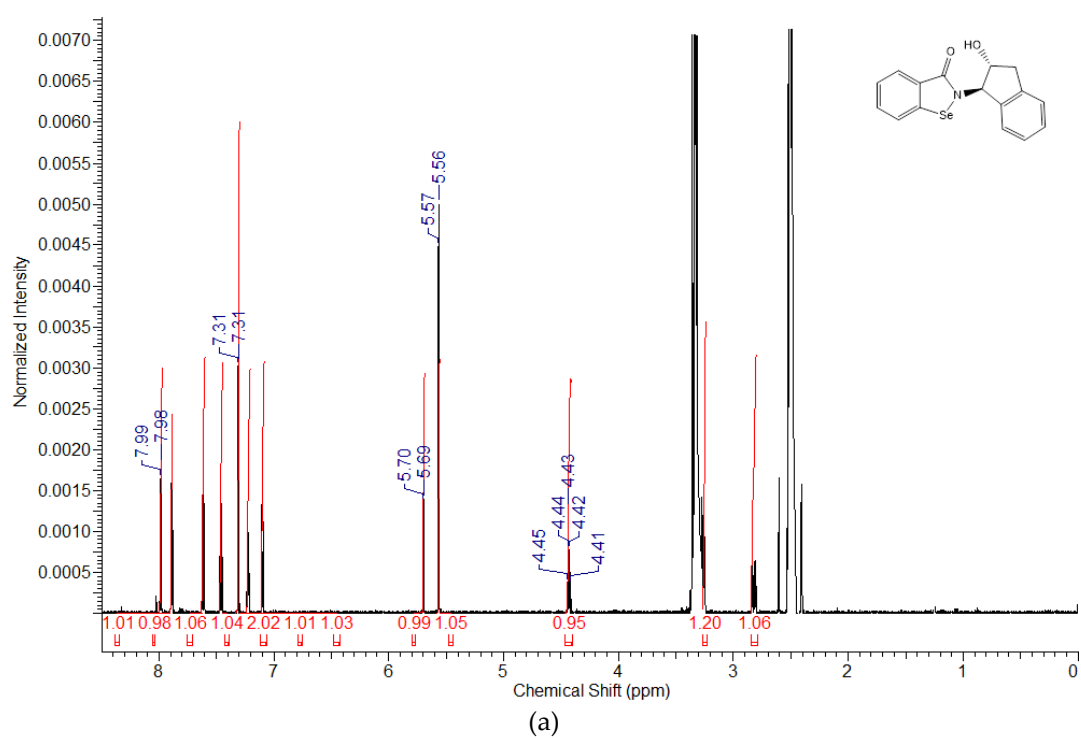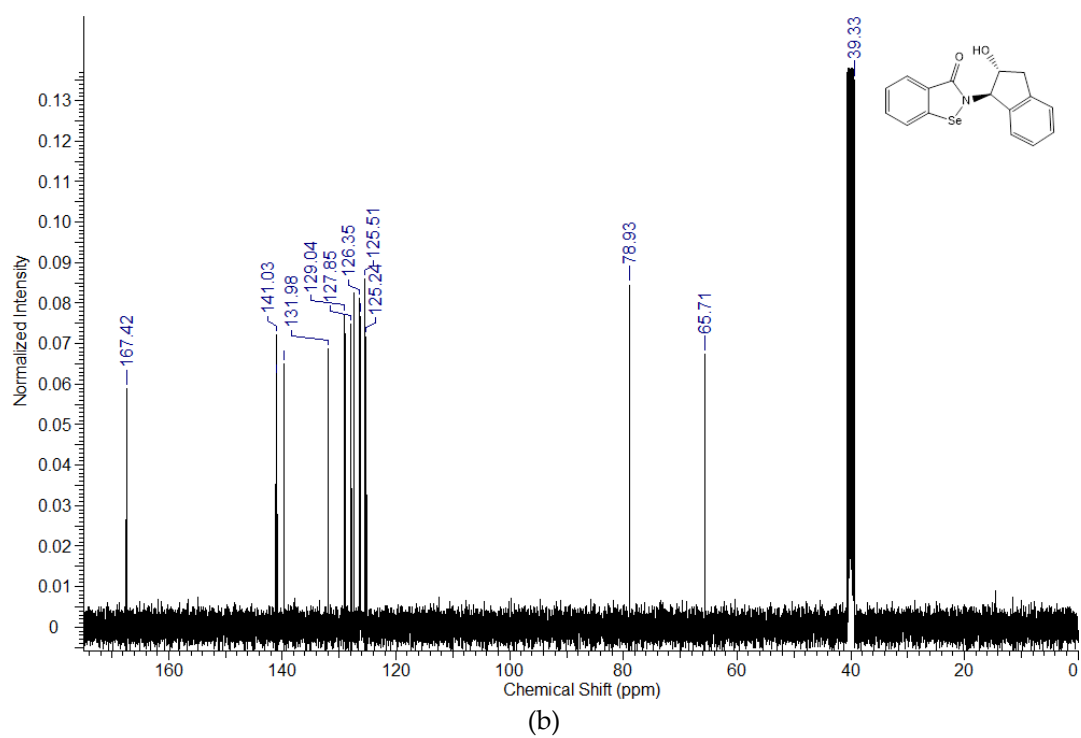

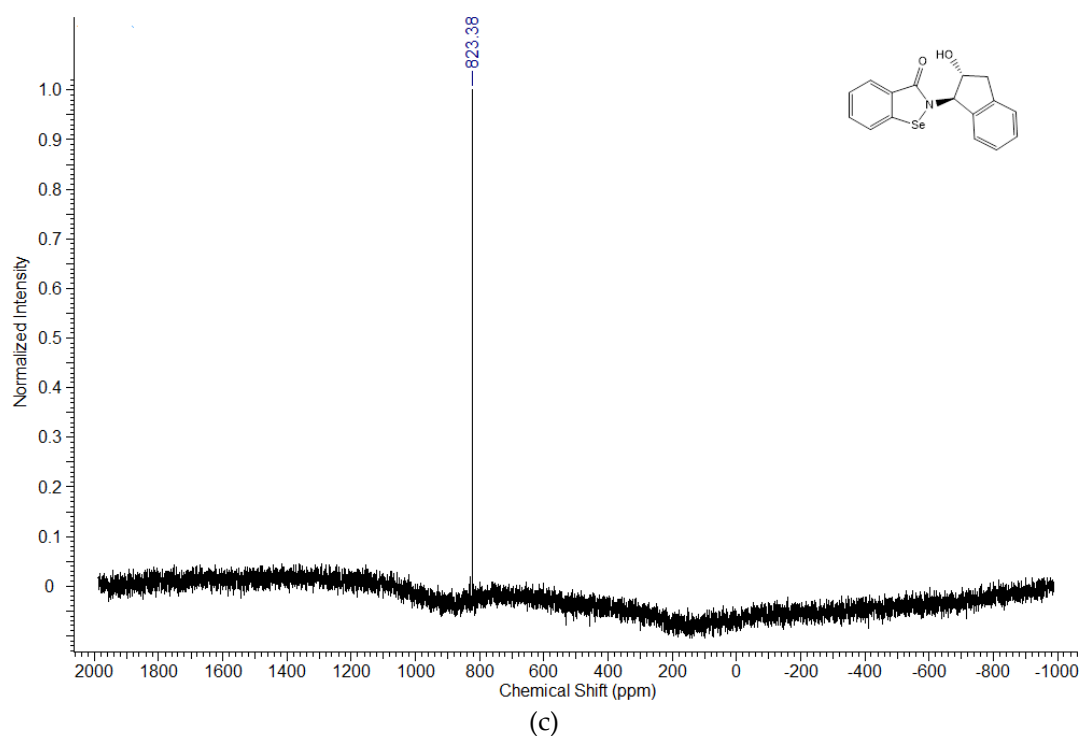

**Figure S14.** (a)  $^1\text{H}$  NMR, (b)  $^{13}\text{C}$  NMR, and (c)  $^{77}\text{Se}$  NMR spectra of *N*-[(1*R*,2*R*)-(-)-*trans*-2-hydroxy-1-indanyl]-1,2-benzisoselenazol-3(2*H*)-one **31a**.

## 2. NMR spectra of diselenides 18b-31b

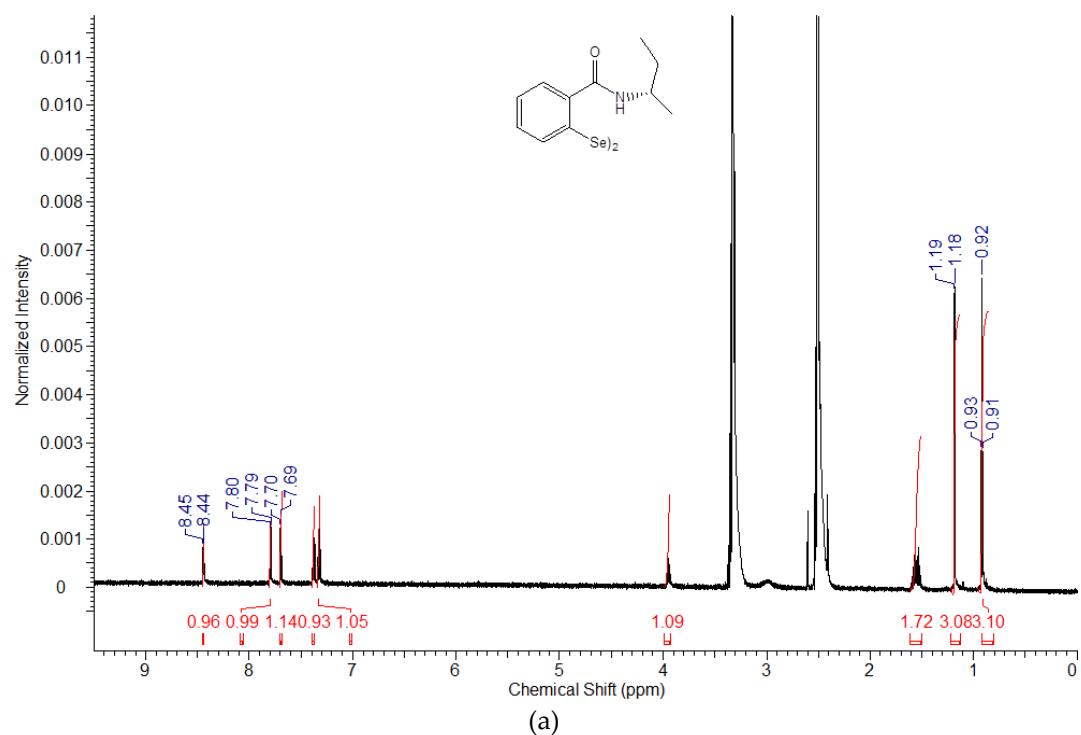

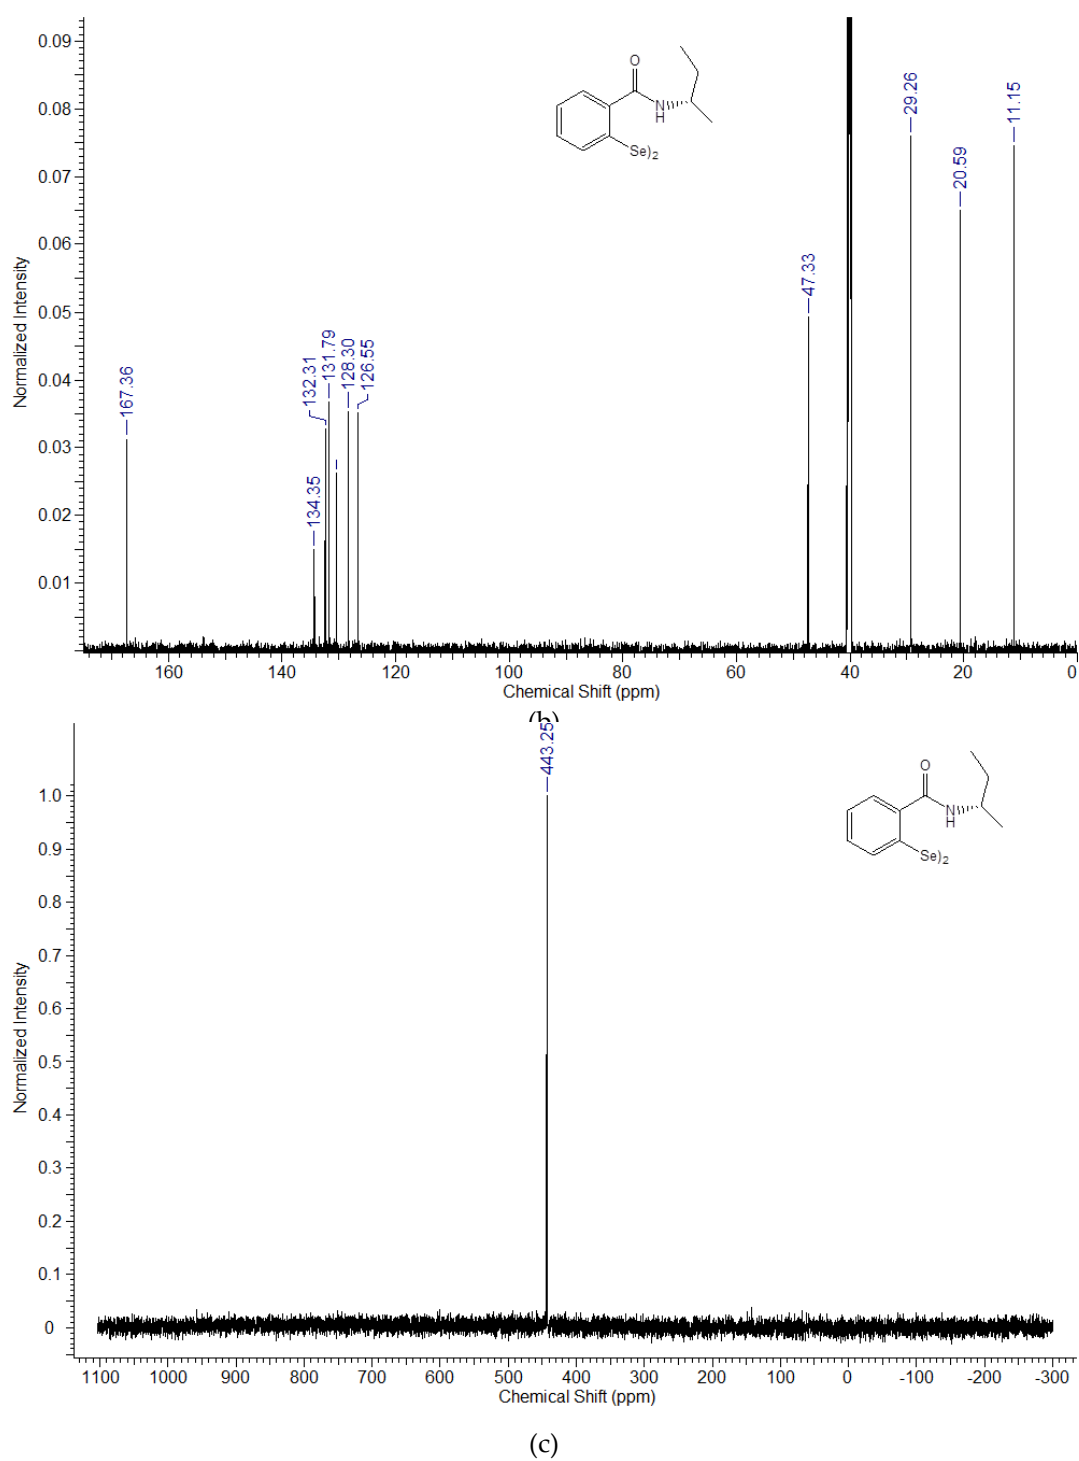

**Figure S15.** (a) <sup>1</sup>H NMR, (b) <sup>13</sup>C NMR, and (c) <sup>77</sup>Se NMR spectra of 2,2'-diselenobis[N-(S)-(+)-sec-butylbezamide] **18b**

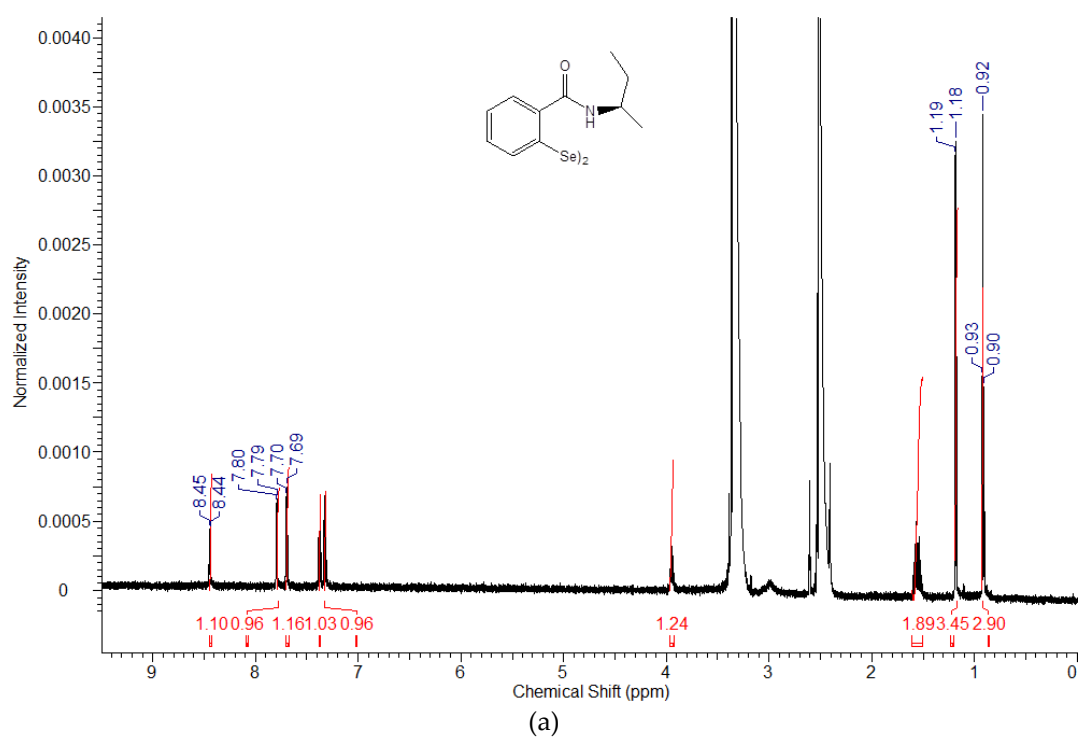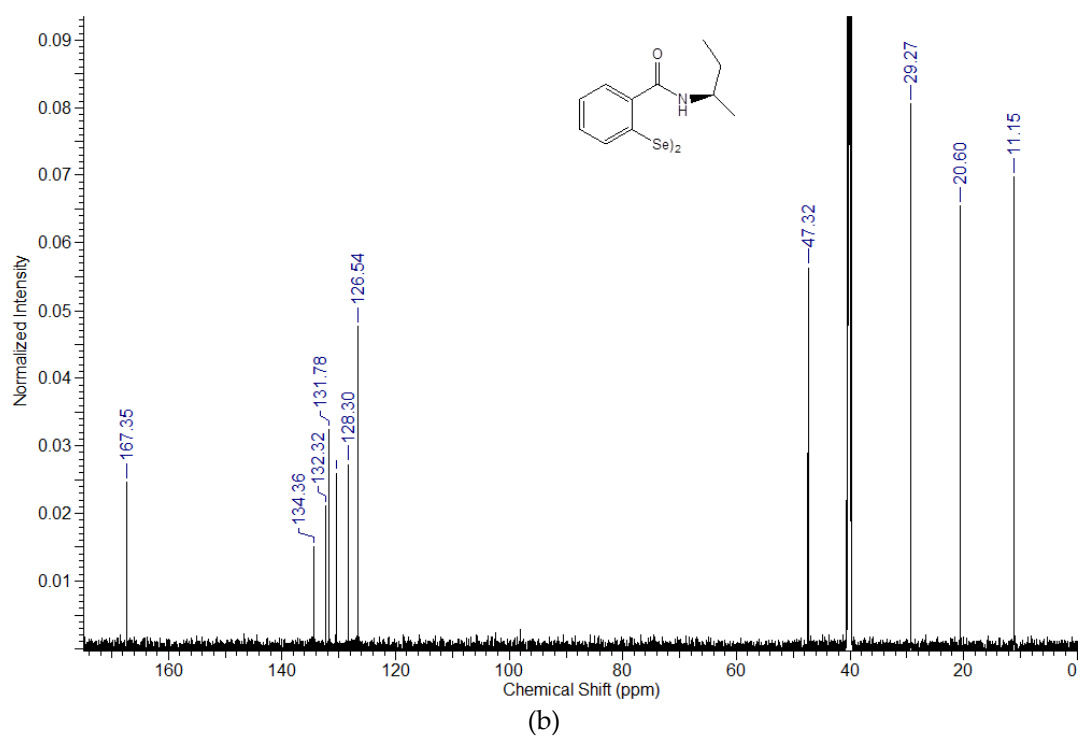



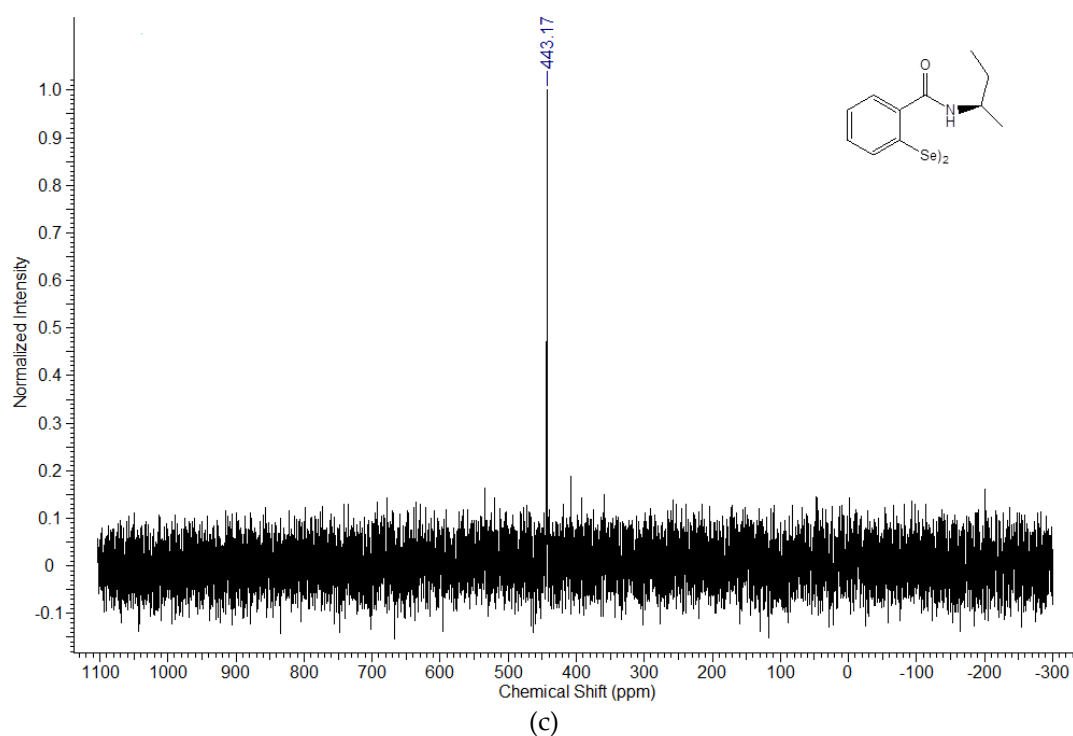

**Figure S16.** (a)  $^1\text{H}$  NMR, (b)  $^{13}\text{C}$  NMR, and (c)  $^{77}\text{Se}$  NMR spectra of 2,2'-diselenobis[*N*-(*R*)-(-)-*sec*-butylbenzamide] **19b**

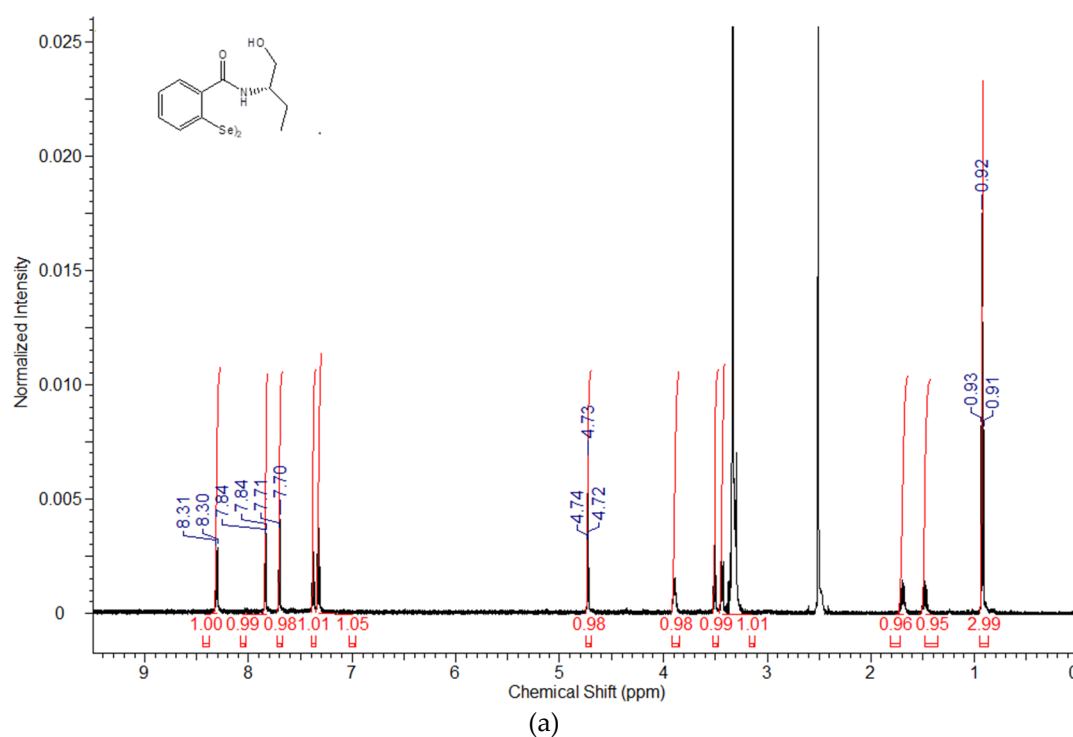

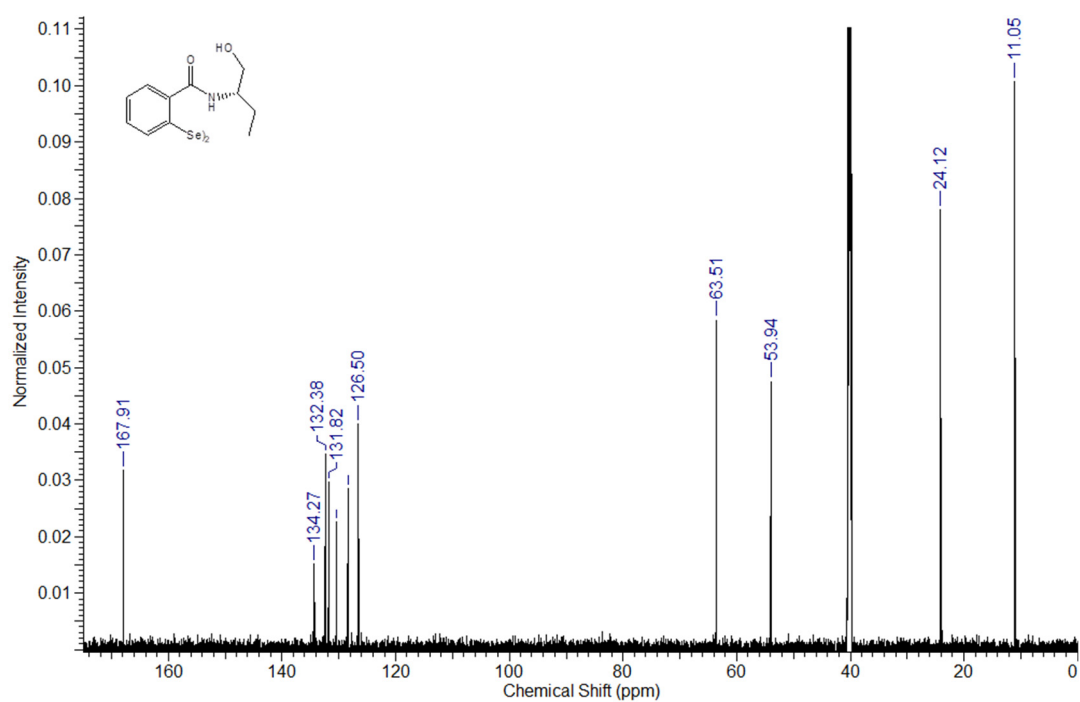

(b)

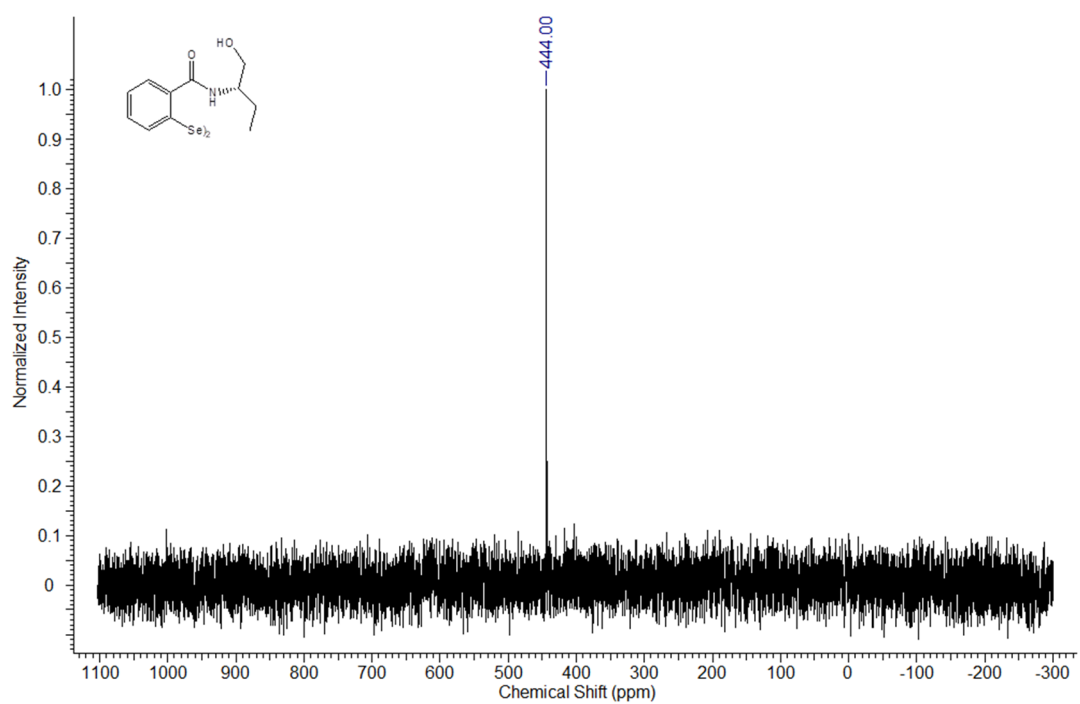

(c)

**Figure S17.** (a) <sup>1</sup>H NMR, (b) <sup>13</sup>C NMR, and (c) <sup>77</sup>Se NMR spectra of 2,2'-diselenobis[*N*-(*S*)-(+)-1-hydroxy-2-butanylbezamide] **20b**

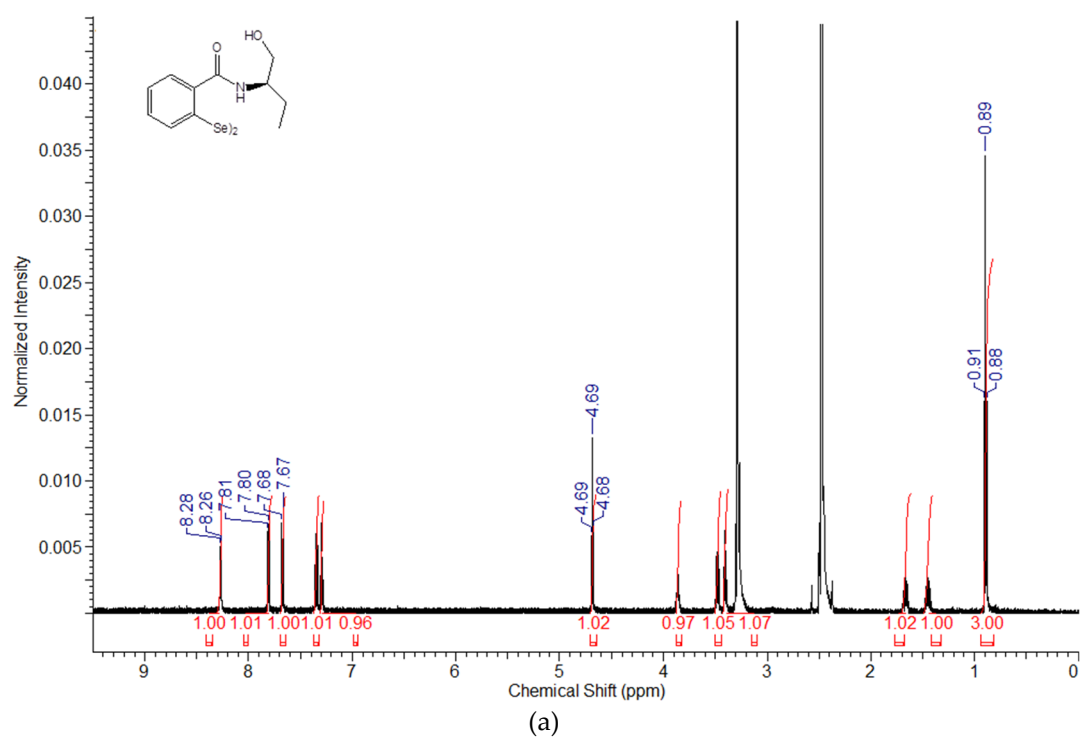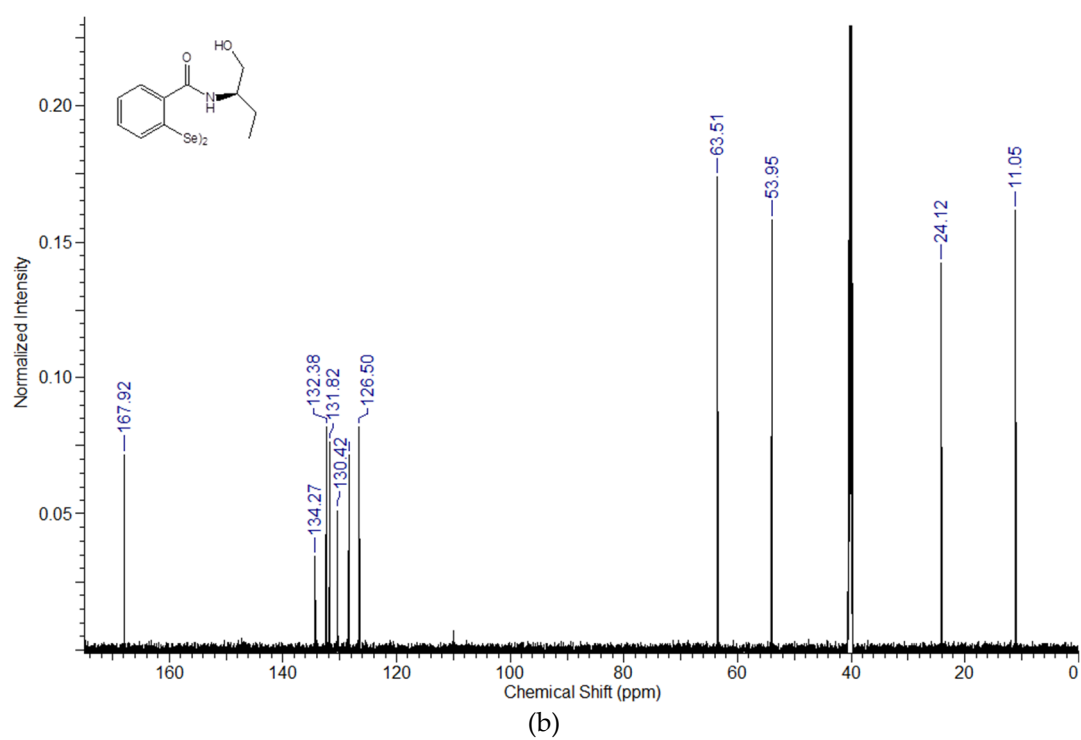

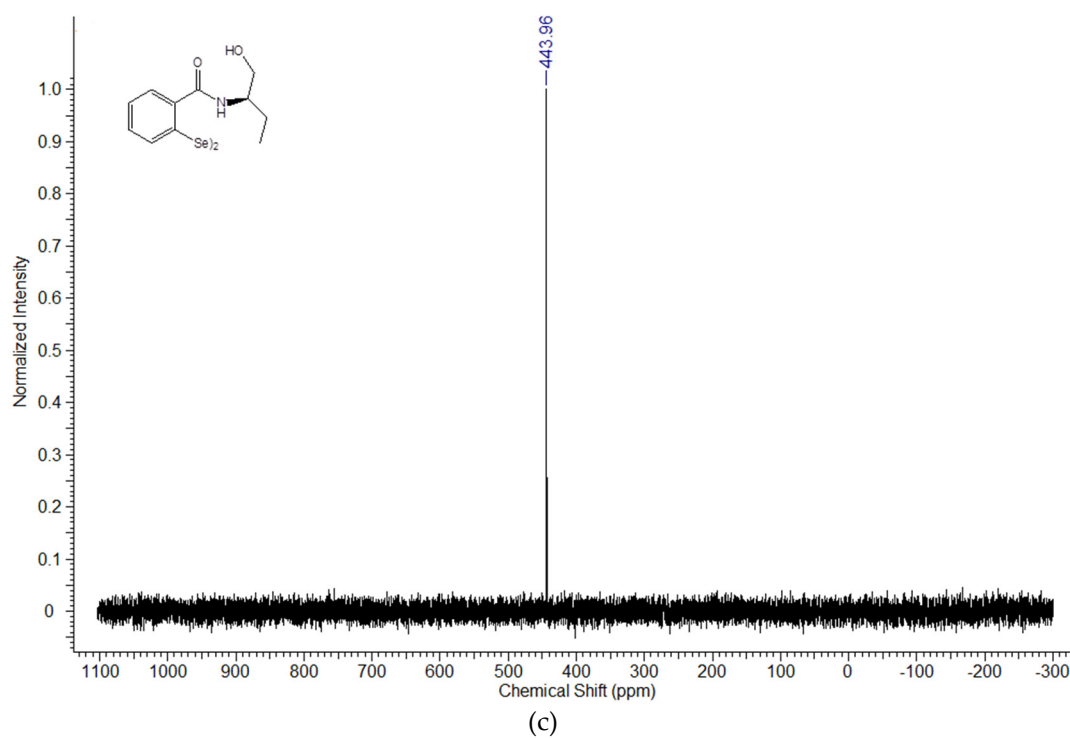

**Figure S18.** (a)  $^1\text{H}$  NMR, (b)  $^{13}\text{C}$  NMR, and (c)  $^{77}\text{Se}$  NMR spectra of 2,2'-diselenobis[*N*-(*R*)-(-)-1-hydroxy-2-butanylbezamide] **21b**.

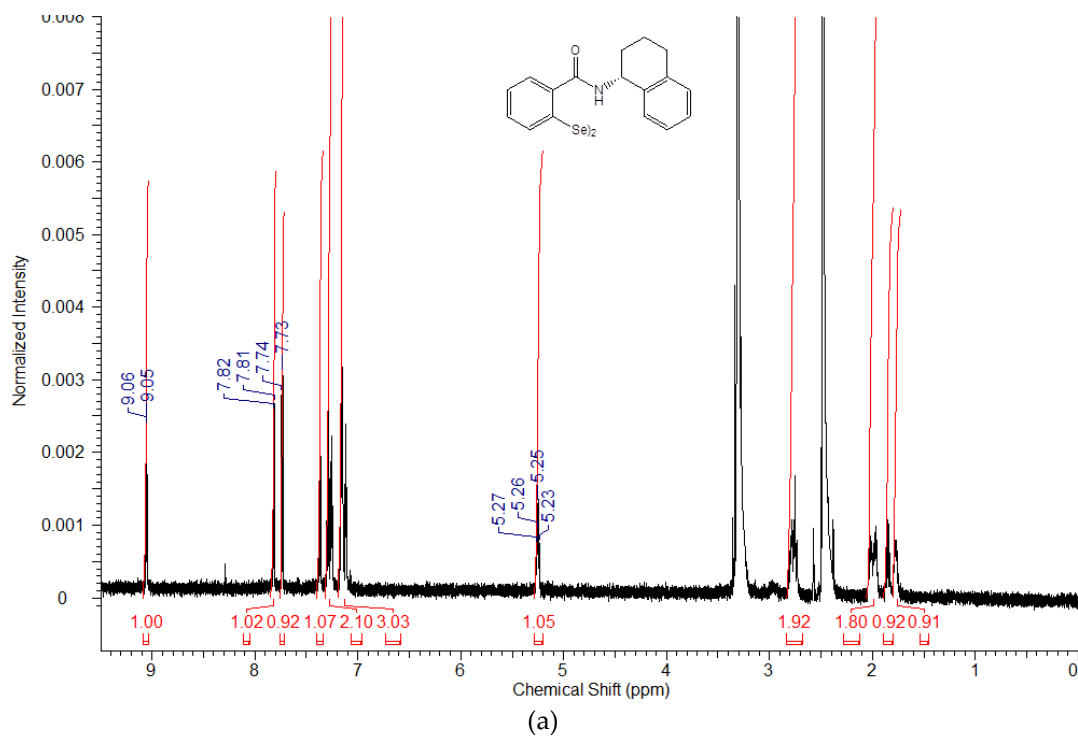

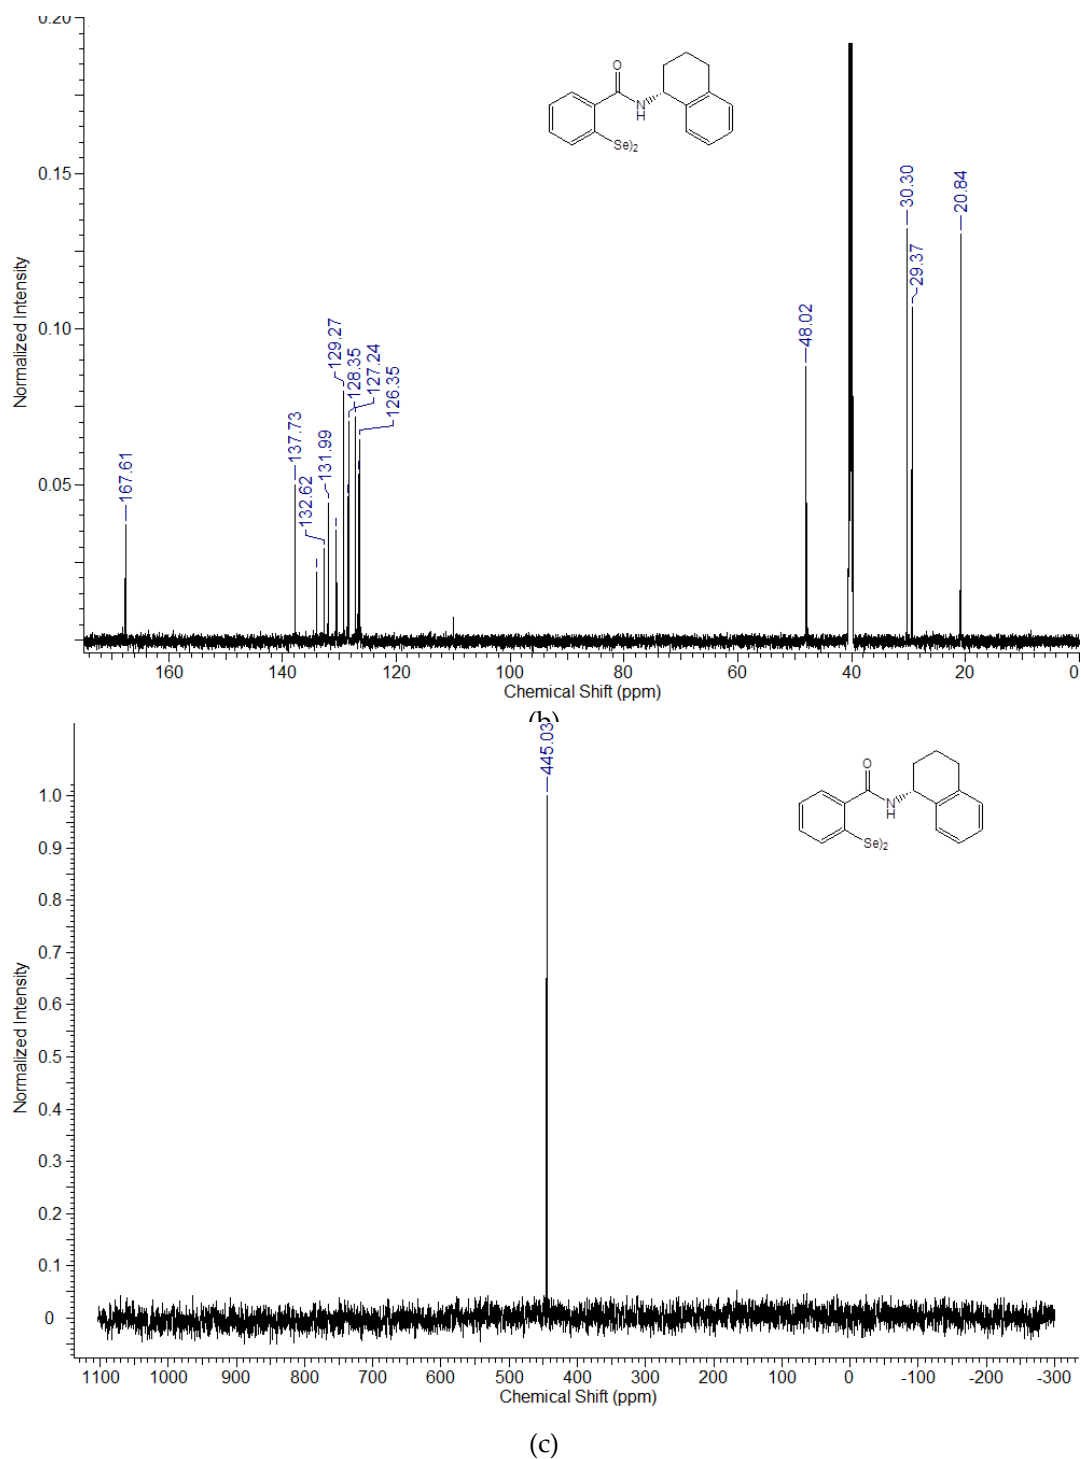

**Figure S19.** (a)  $^1\text{H}$  NMR, (b)  $^{13}\text{C}$  NMR, and (c)  $^{77}\text{Se}$  NMR spectra of 2,2'-diselenobis[N-(R)-(-)-1,2,3,4-tetrahydro-1-naphylbenzamide] 22b

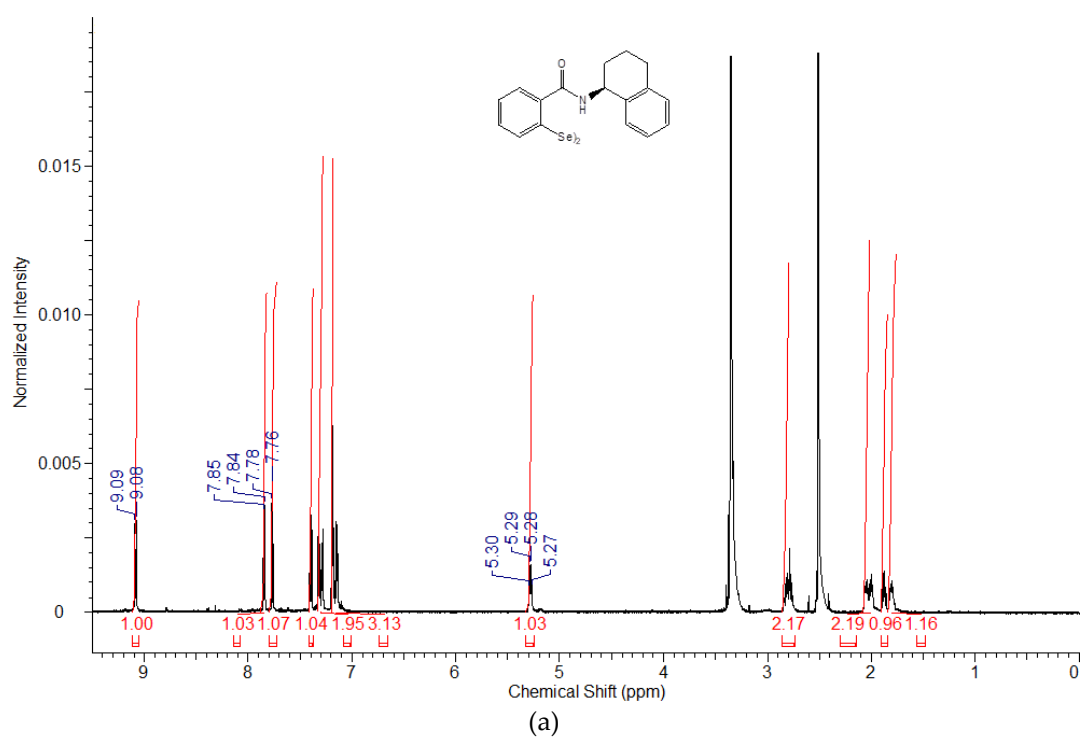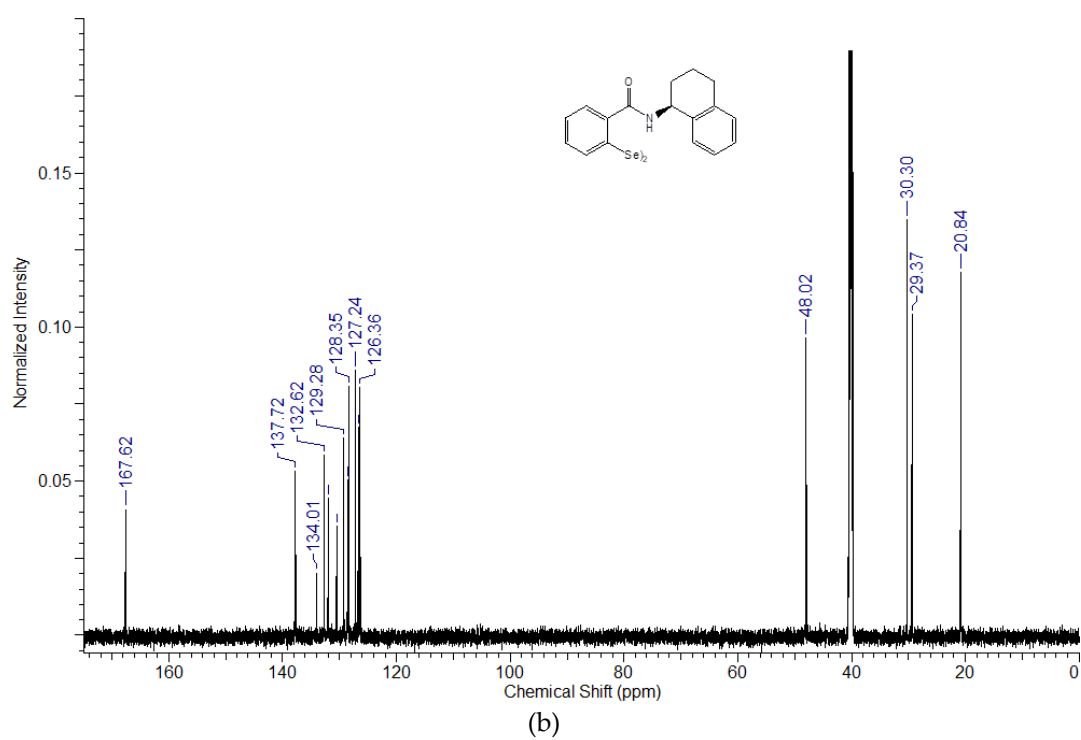

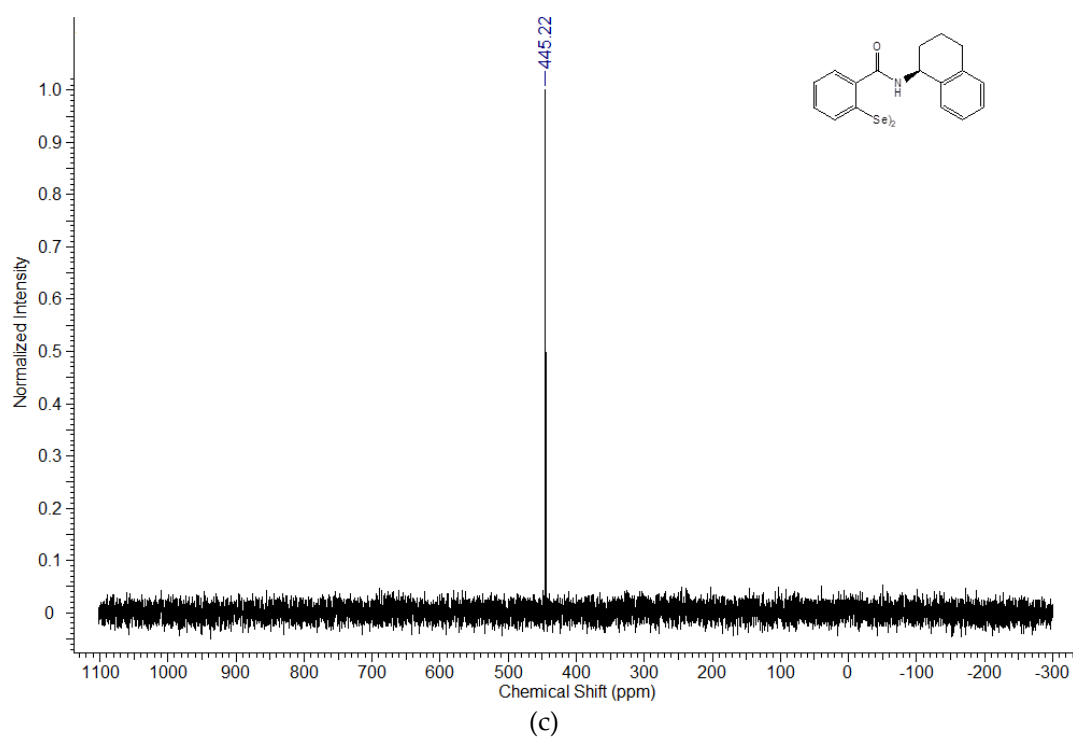

**Figure S20.** (a)  $^1\text{H}$  NMR, (b)  $^{13}\text{C}$  NMR, and (c)  $^{77}\text{Se}$  NMR spectra of 2,2'-diselenobis[*N*-(*S*)-(+)-1,2,3,4-tetrahydro-1-naphthylbezamide] **23b**

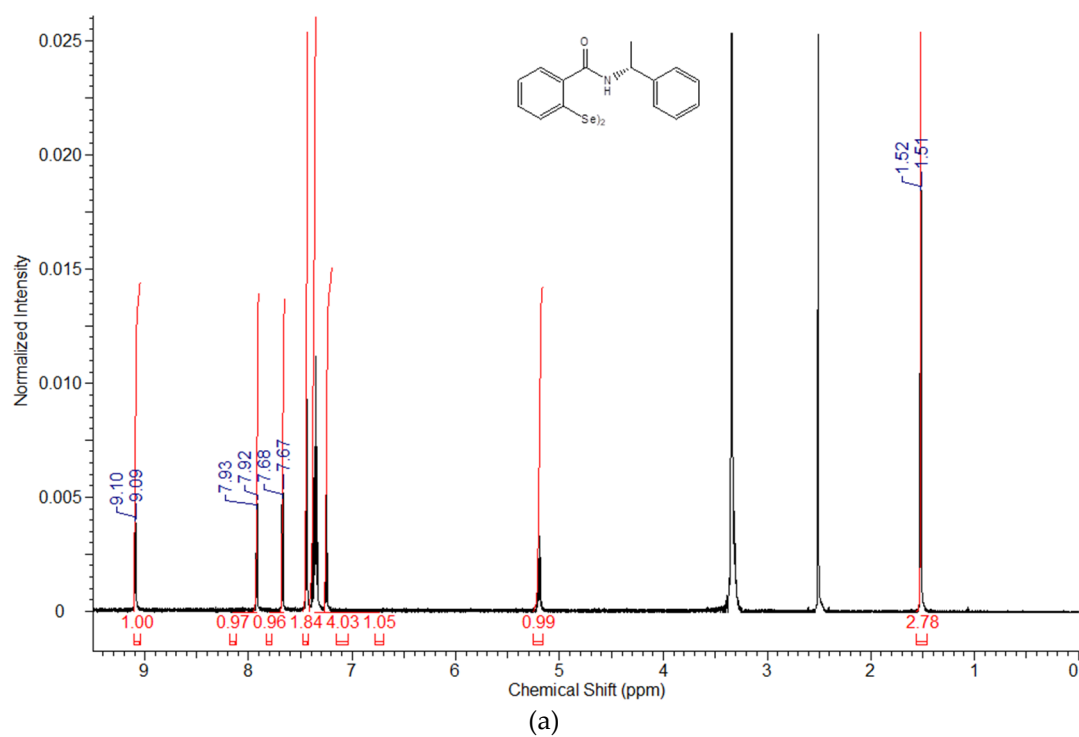

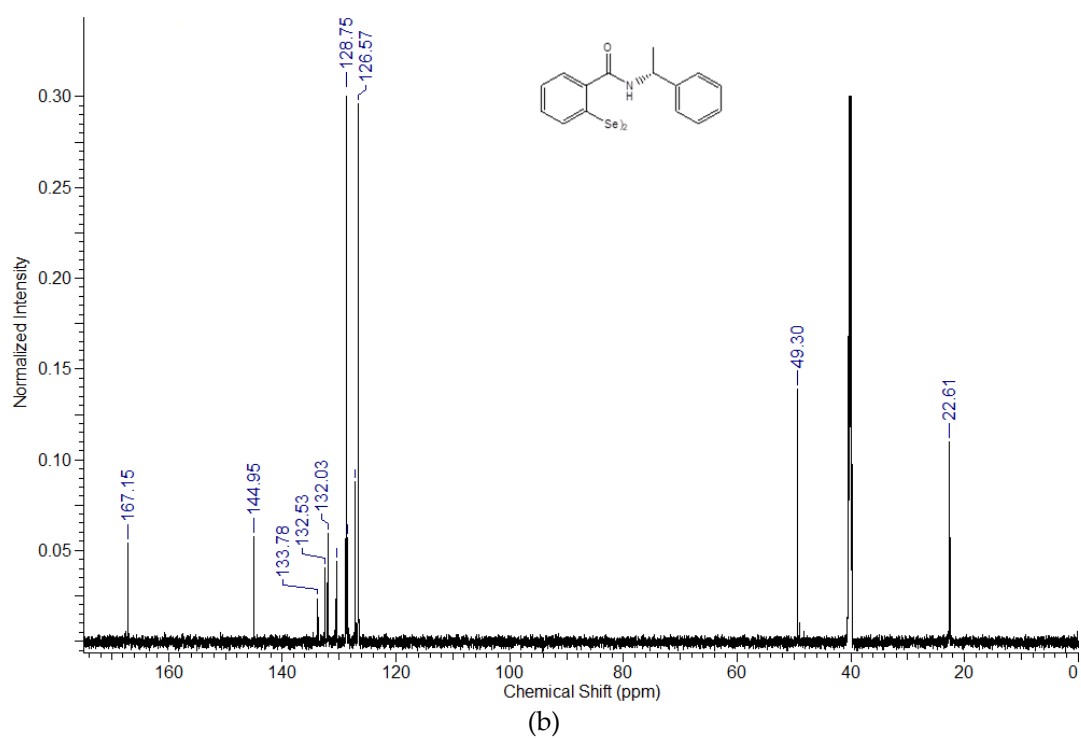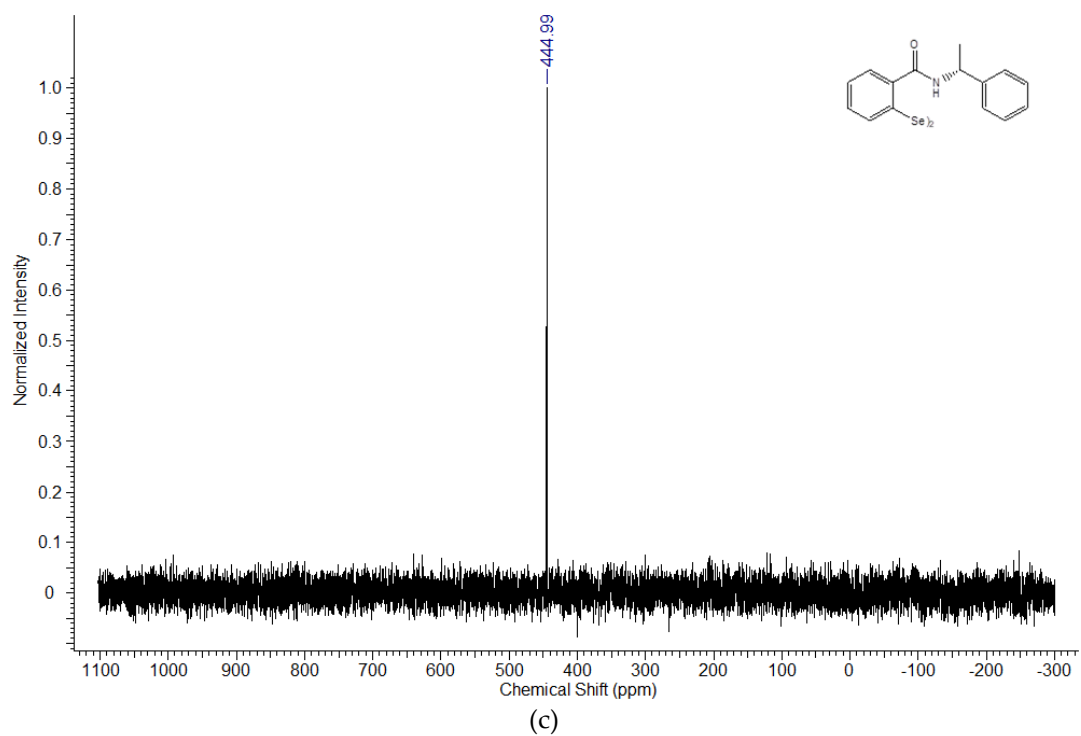

**Figure S21.** (a)  $^1\text{H}$  NMR, (b)  $^{13}\text{C}$  NMR, and (c)  $^{77}\text{Se}$  NMR spectra of 2,2'-diselenobis[N-(R)-(+)- $\alpha$ -methylbenzylbezamide] **24b**.



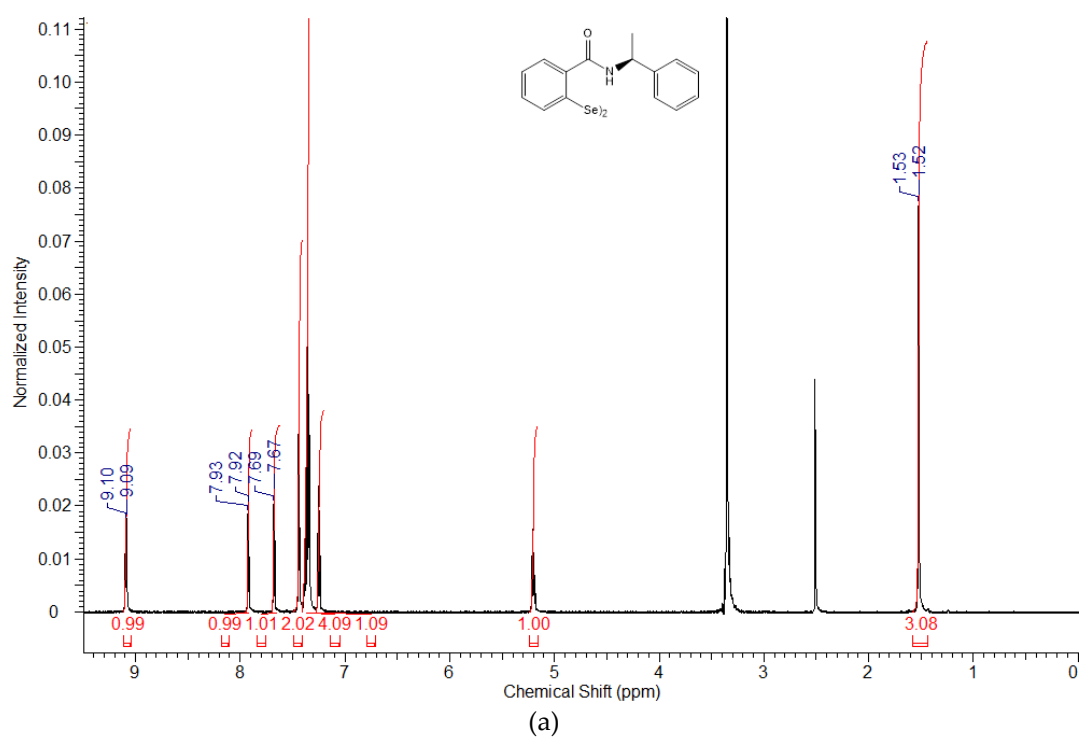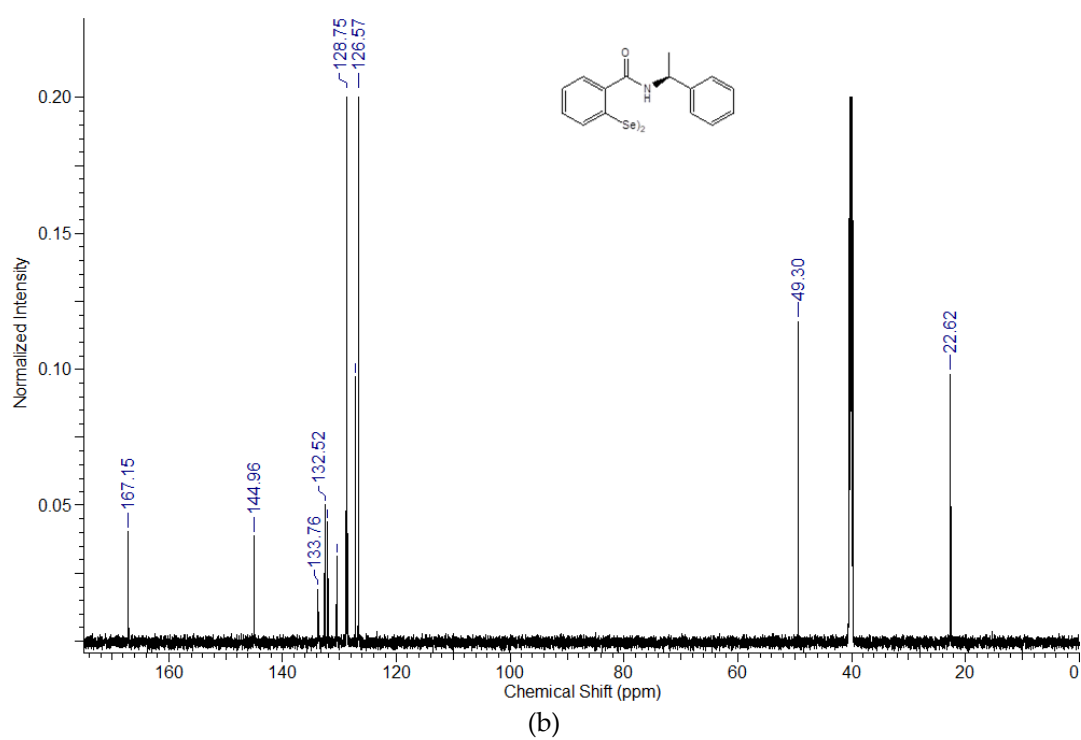

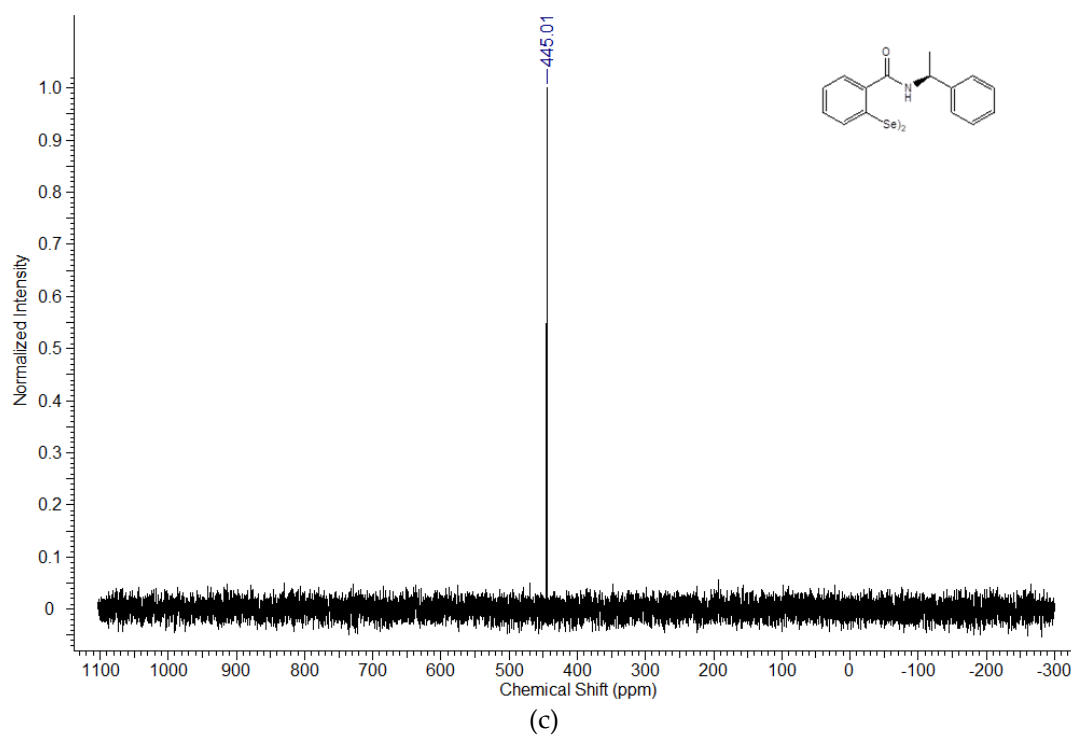

**Figure S22.** (a)  $^1\text{H}$  NMR, (b)  $^{13}\text{C}$  NMR, and (c)  $^{77}\text{Se}$  NMR spectra of 2,2'-diselenobis[N-(S)-(-)- $\alpha$ -methylbenzylbezamide] **25b**.

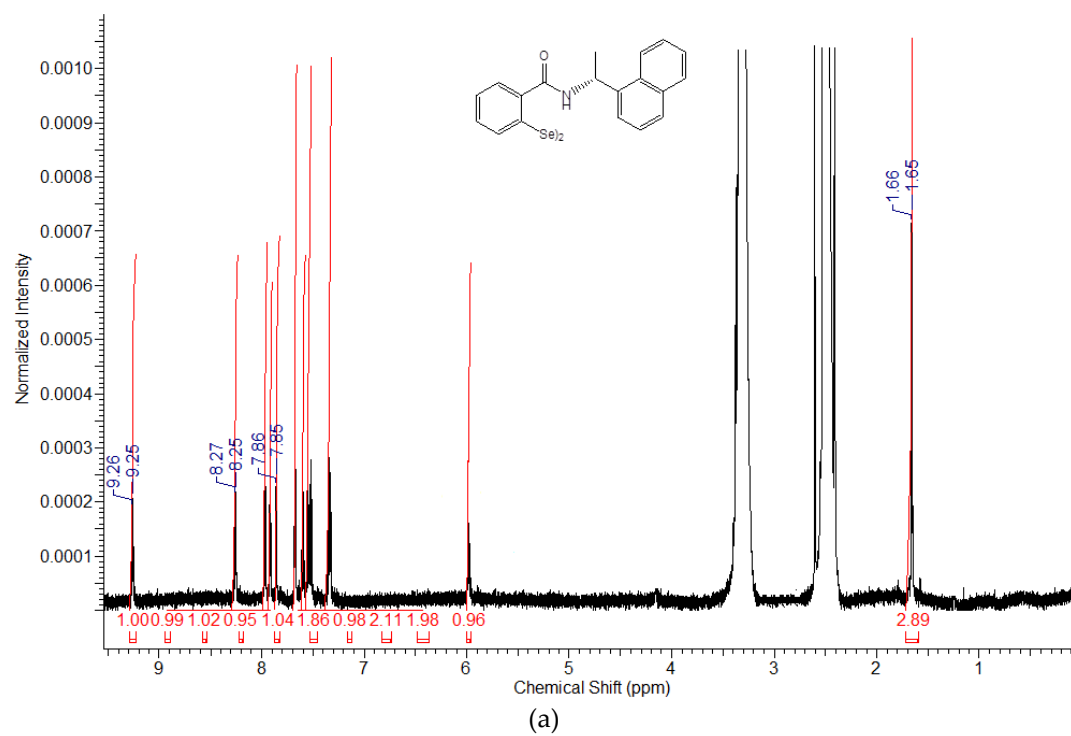

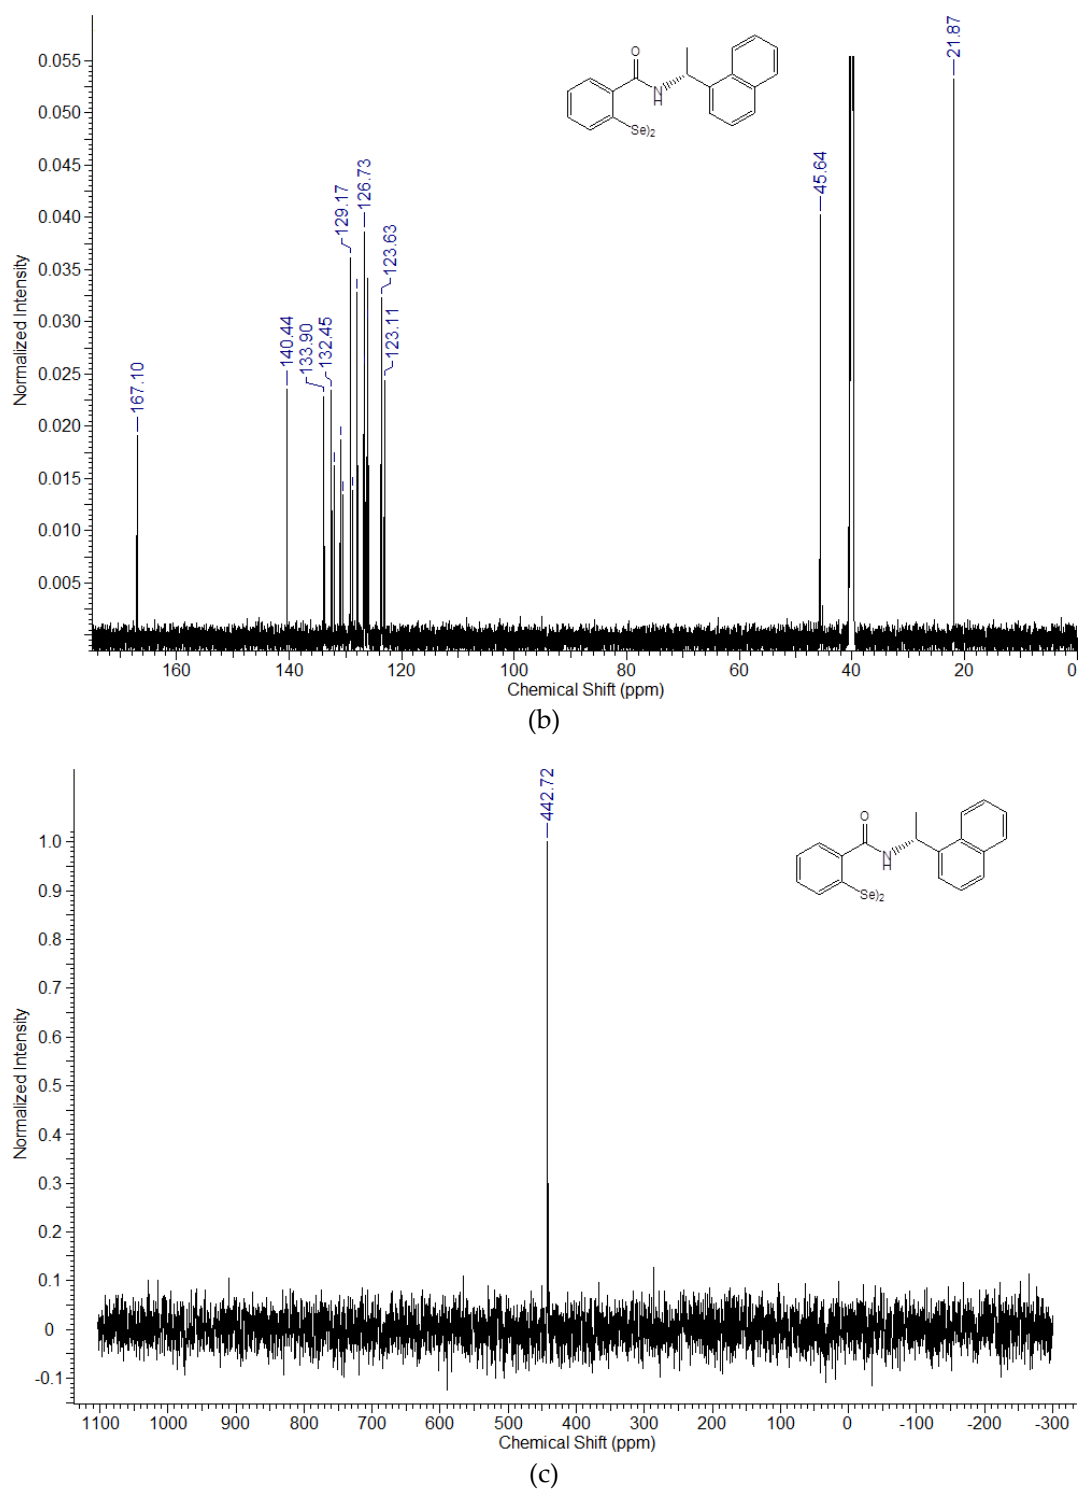

**Figure S23.** (a) <sup>1</sup>H NMR, (b) <sup>13</sup>C NMR, and (c) <sup>77</sup>Se NMR spectra of 2,2'-diselenobis[*N*-(*S*)-(-)-1-(1-naphthyl)ethyl]benzamide] **26b**.

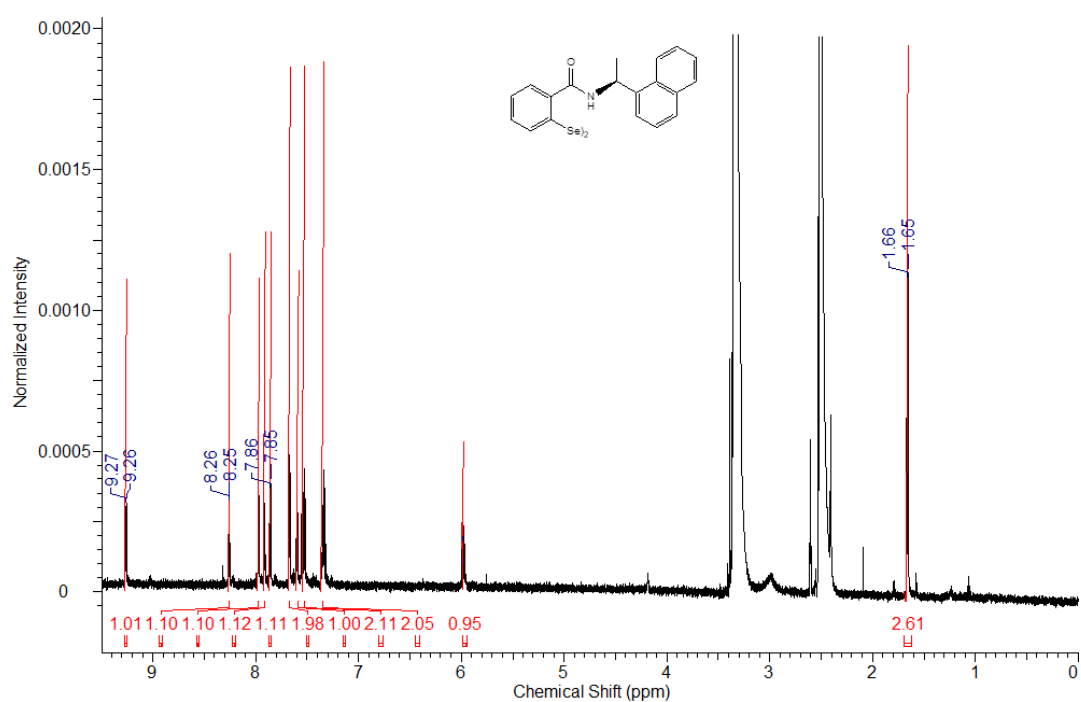

(a)

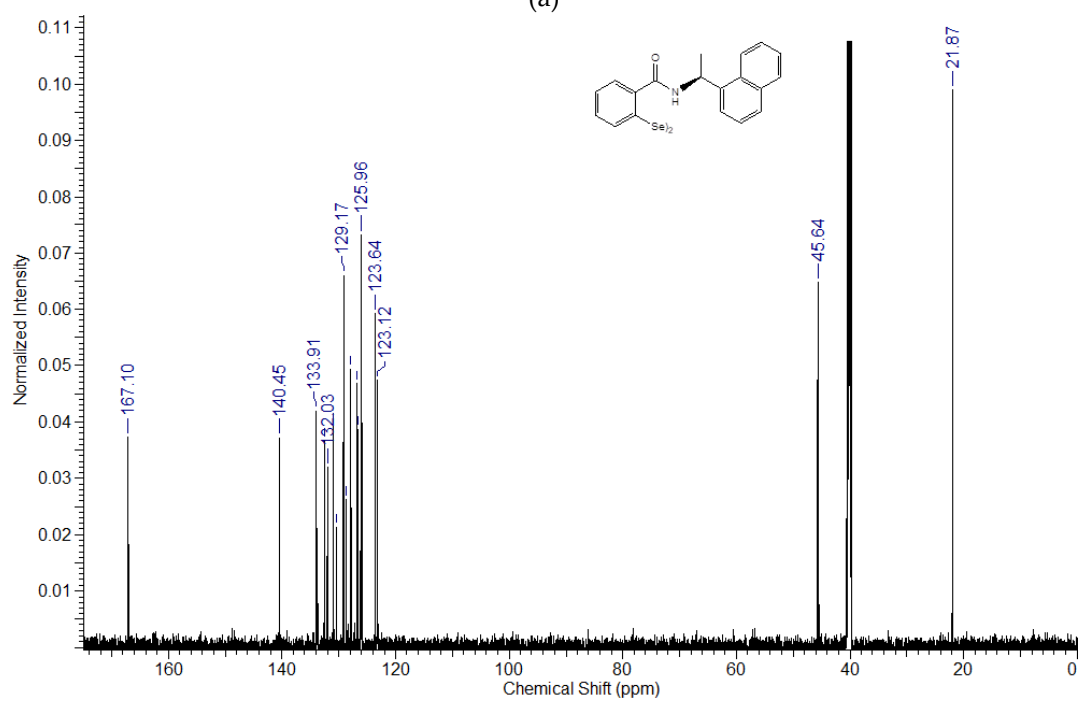

(b)

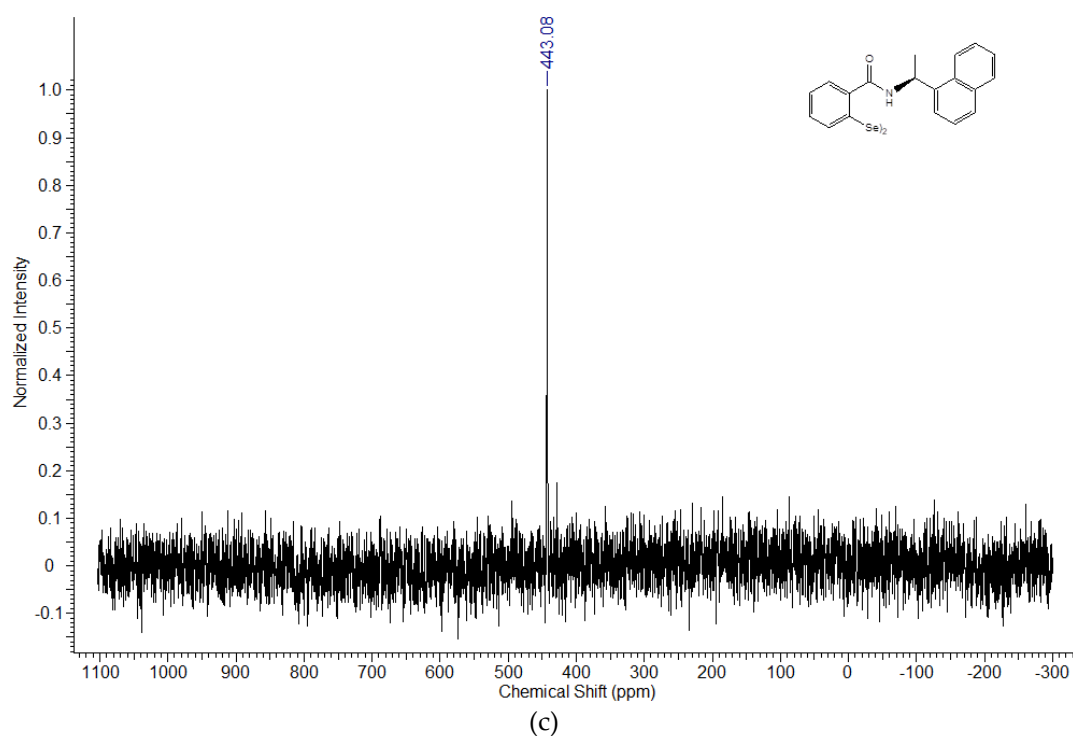

**Figure S24.** (a)  $^1\text{H}$  NMR, (b)  $^{13}\text{C}$  NMR, and (c)  $^{77}\text{Se}$  NMR spectra of 2,2'-diselenobis[N-(R)-(+)-1-(1-naphthyl)ethyl]benzamide **27b**.

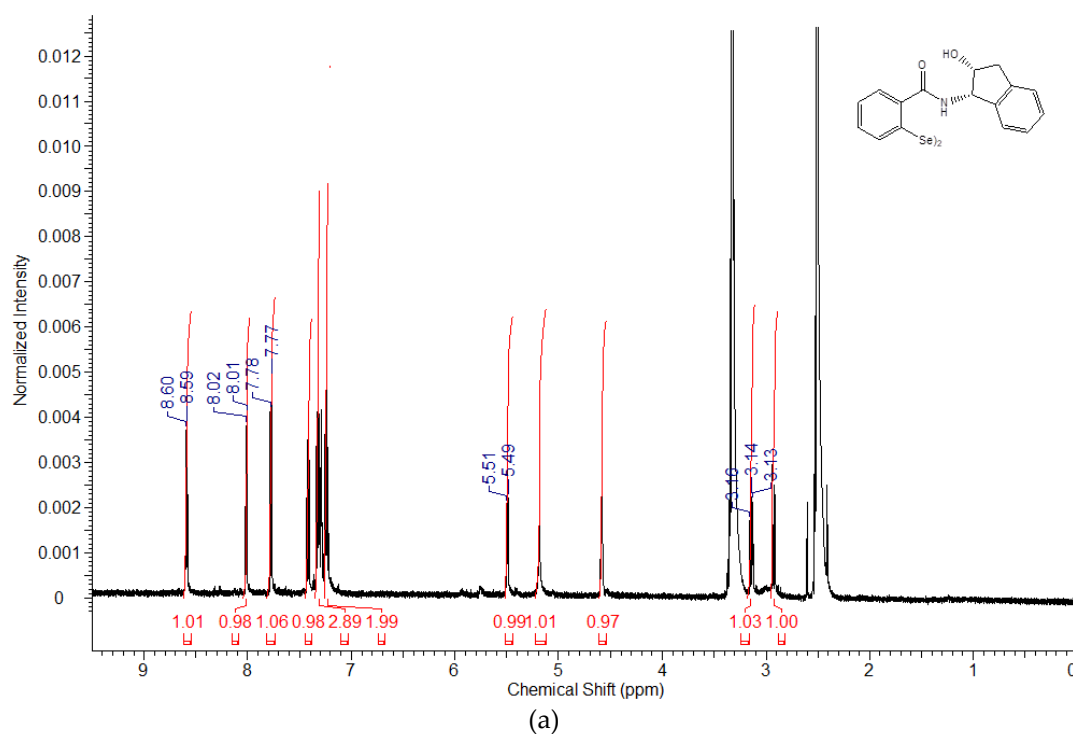

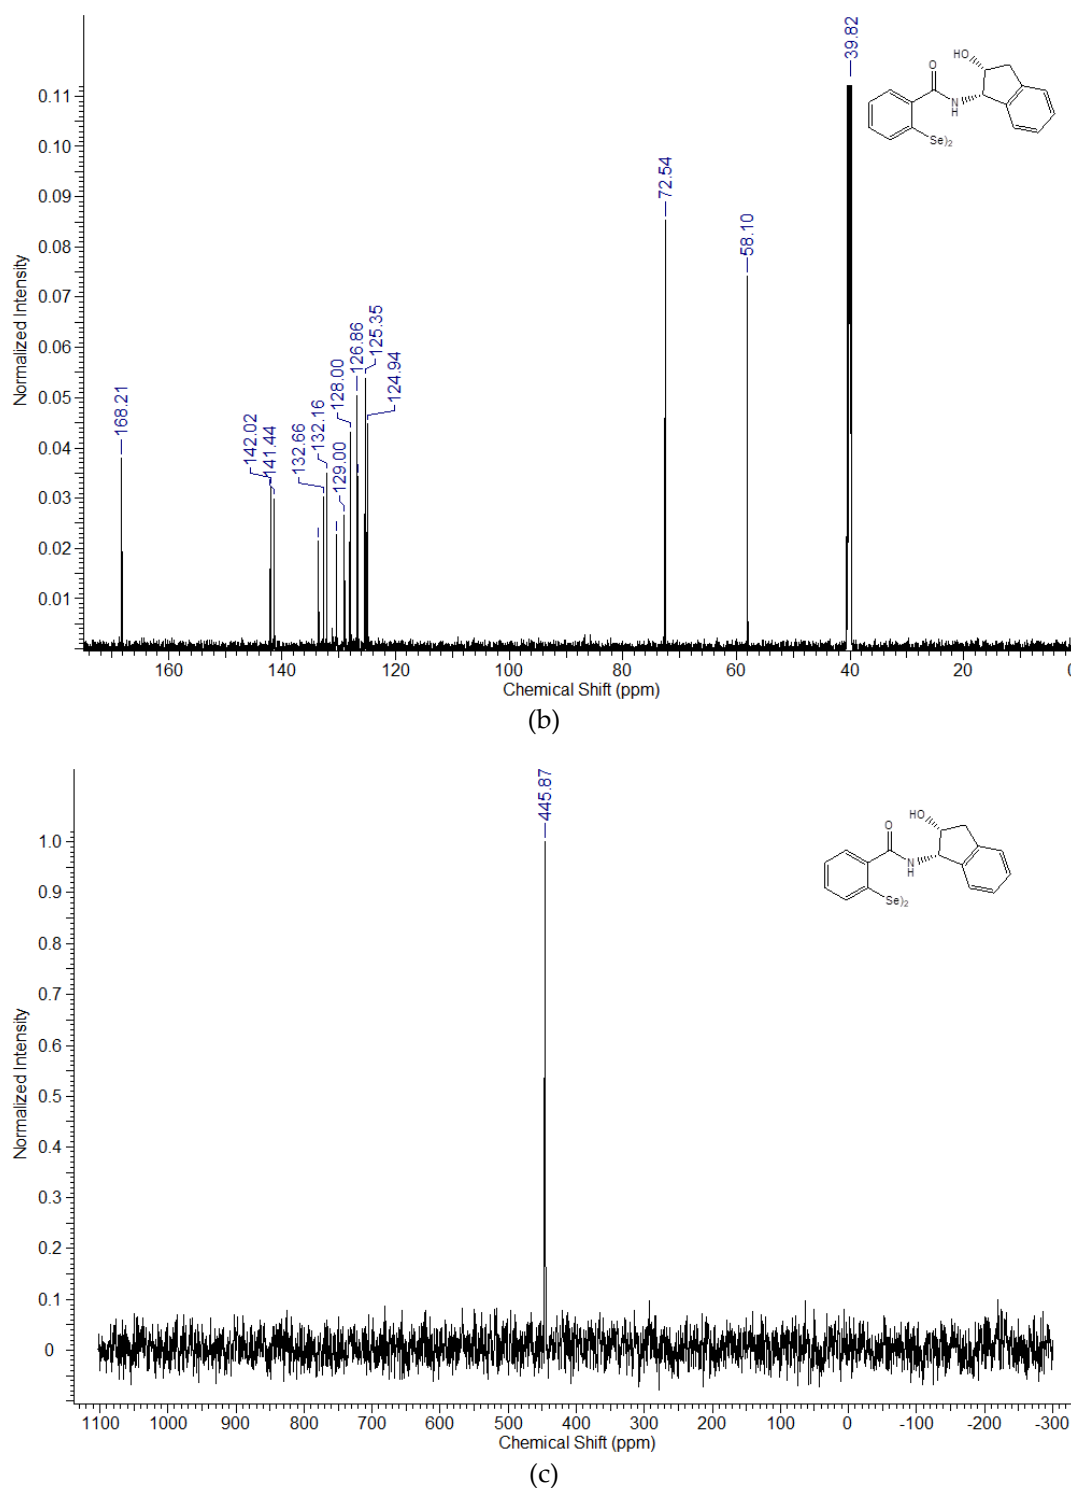

**Figure S25.** (a)  $^1\text{H}$  NMR, (b)  $^{13}\text{C}$  NMR, and (c)  $^{77}\text{Se}$  NMR spectra of 2,2'-diselenobis[N-(1S,2R)-(-)-cis-2-hydroxy-1-indanyl]benzamide **28b**.

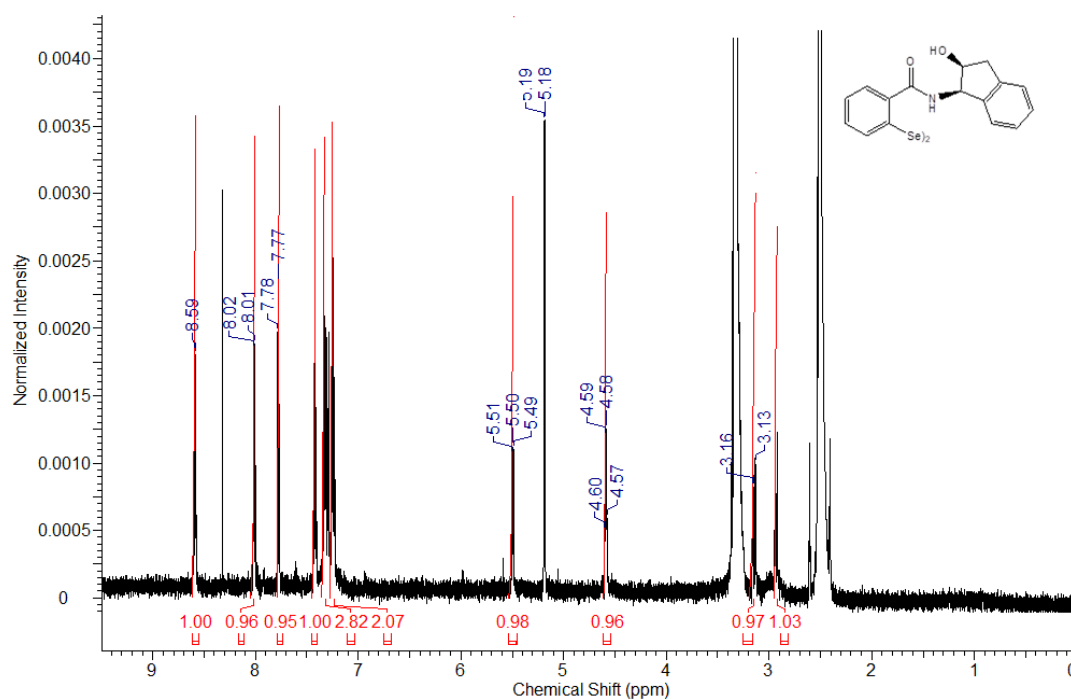

(a)

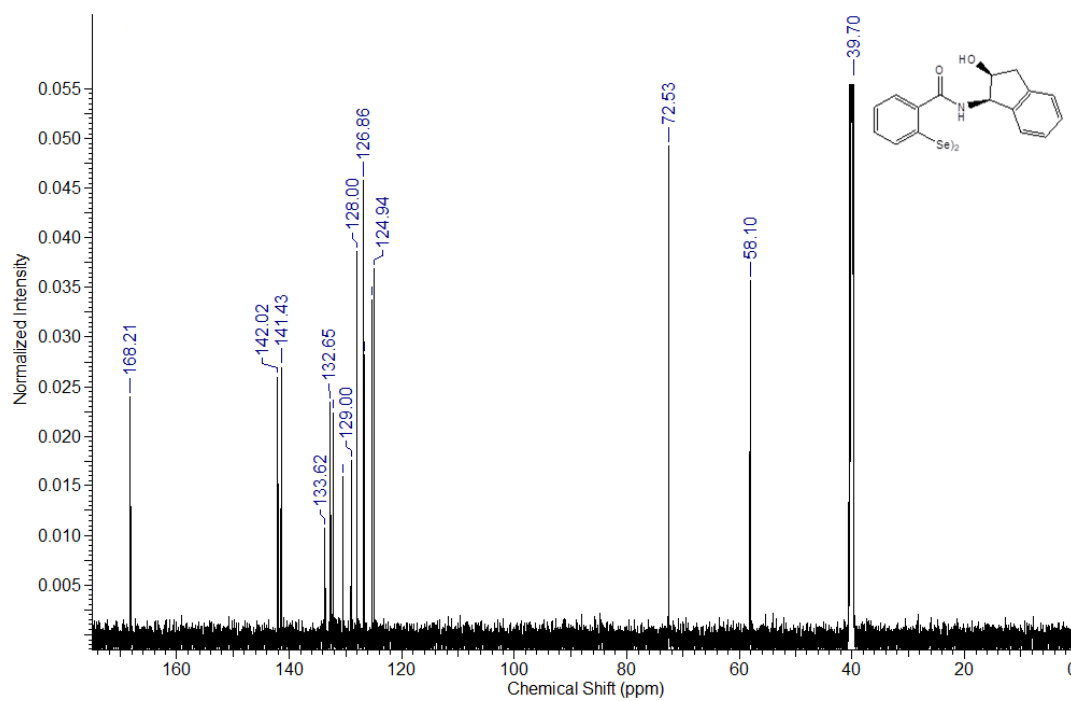

(b)

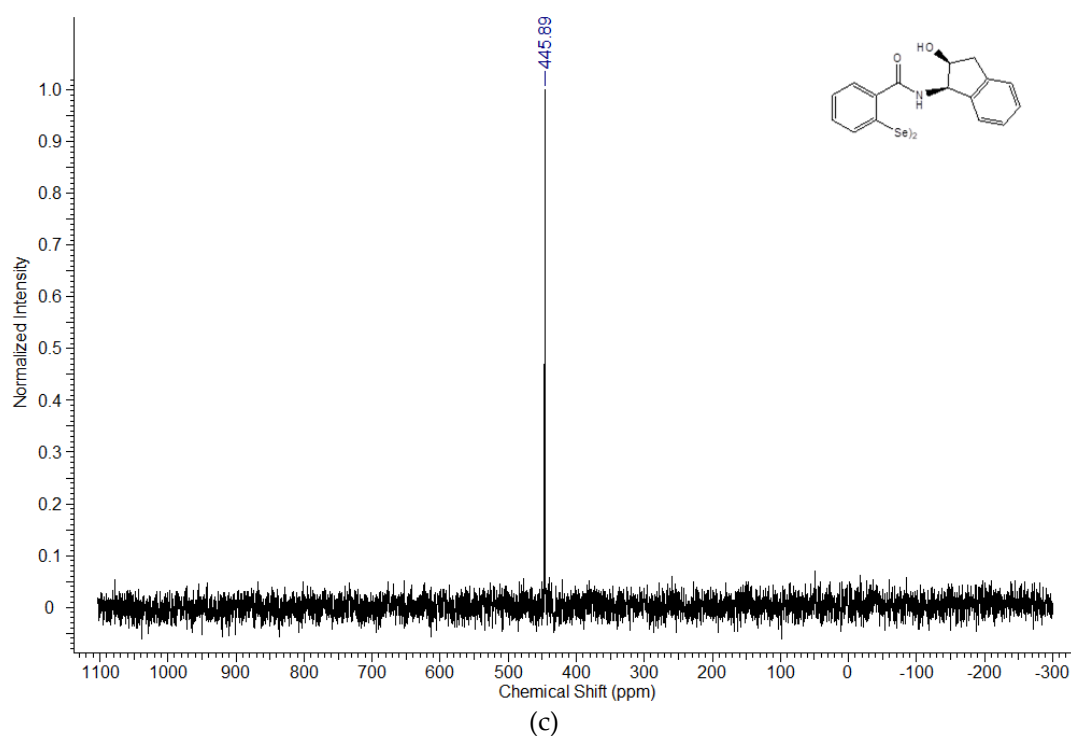

**Figure S26.** (a)  $^1\text{H}$  NMR, (b)  $^{13}\text{C}$  NMR, and (c)  $^{77}\text{Se}$  NMR spectra of 2,2'-diselenobis[*N*-(1*R*,2*S*)-(+)-*cis*-2-hydroxy-1-indanylbezamide] **29b**.

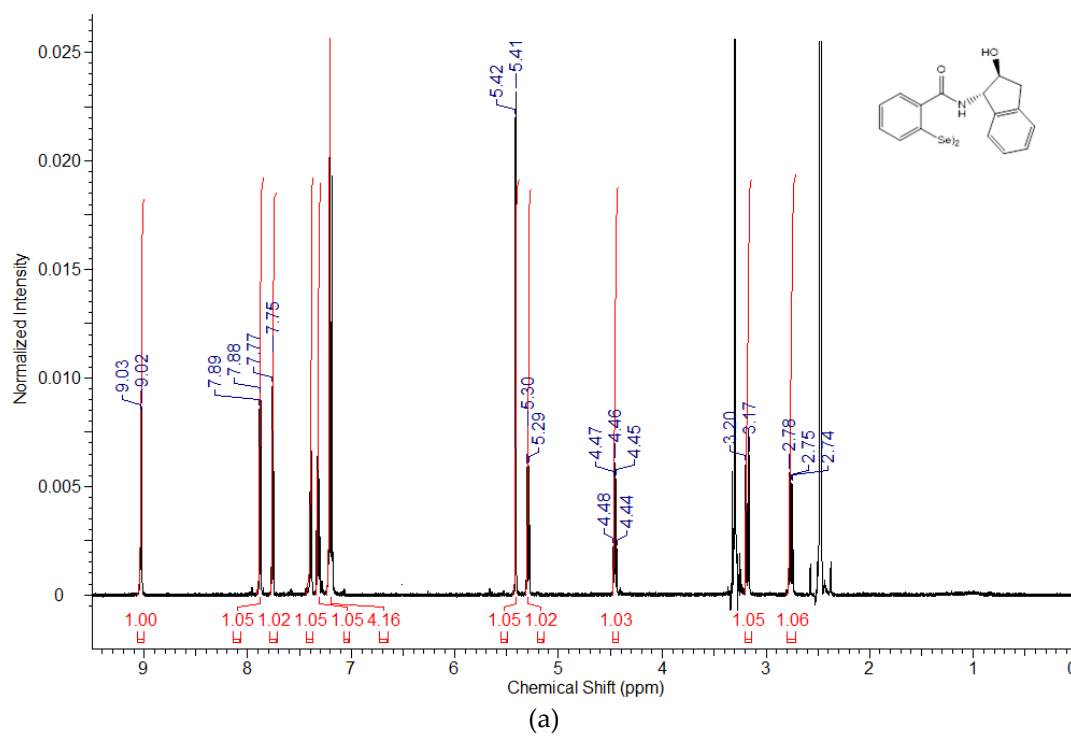



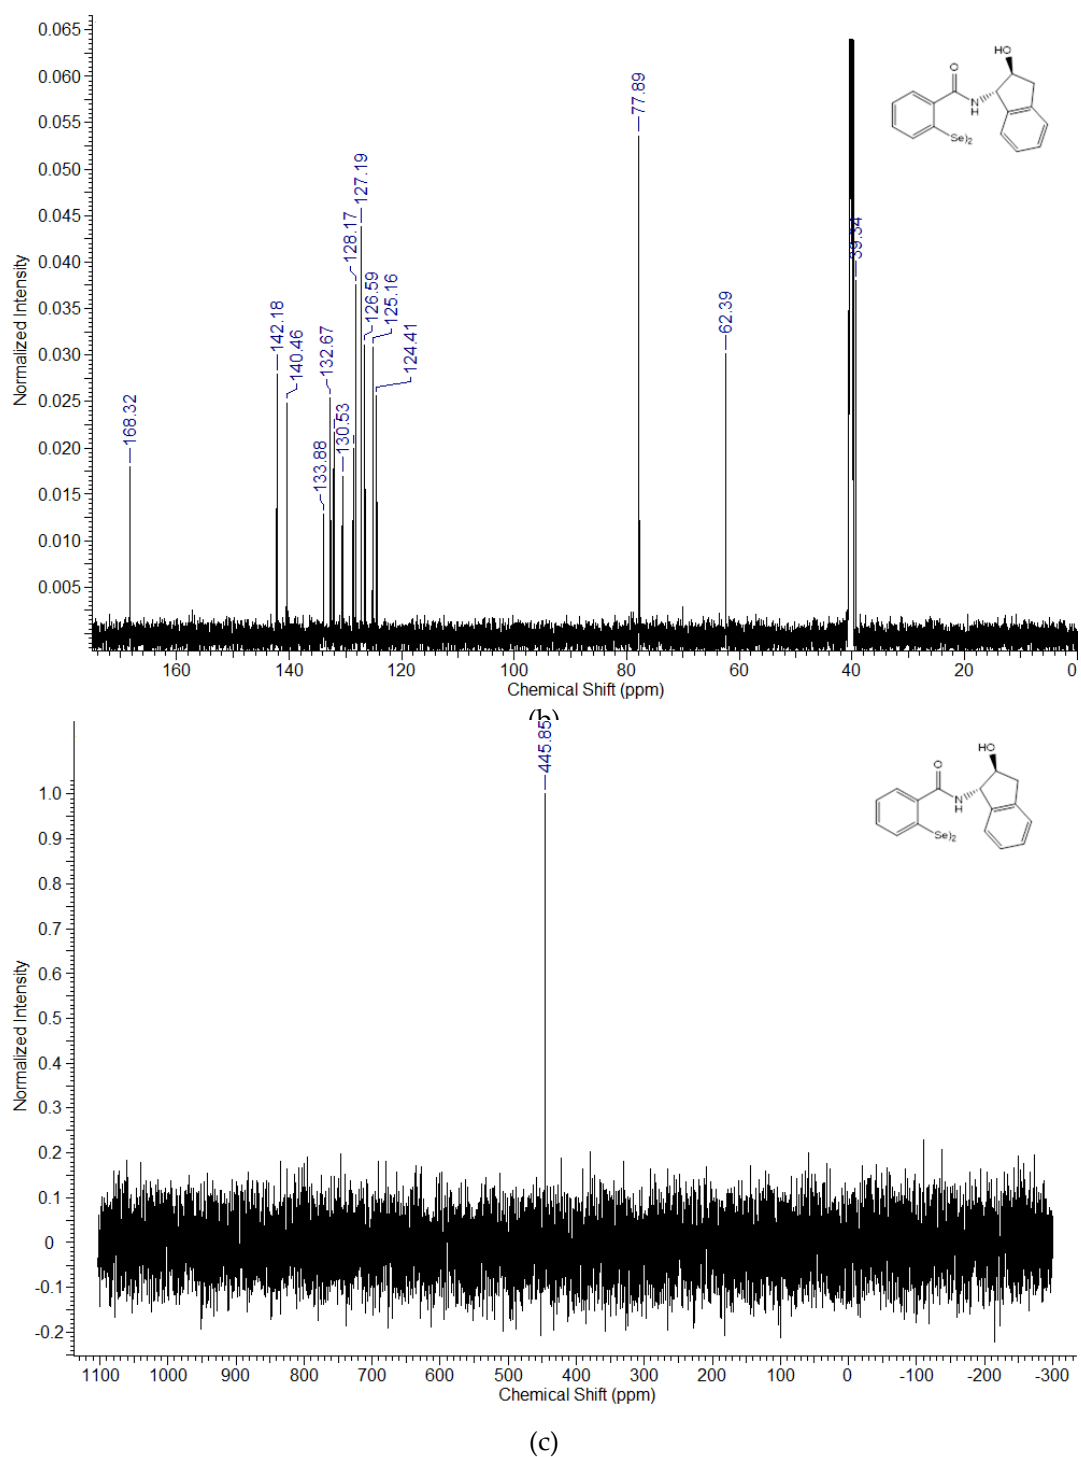

**Figure S27.** (a)  $^1\text{H}$  NMR, (b)  $^{13}\text{C}$  NMR, and (c)  $^{77}\text{Se}$  NMR spectra of 2,2'-diselenobis[N-(1*S*,2*S*)-(-)-*trans*-2-hydroxy-1-indanyl]benzamide] **30b**.

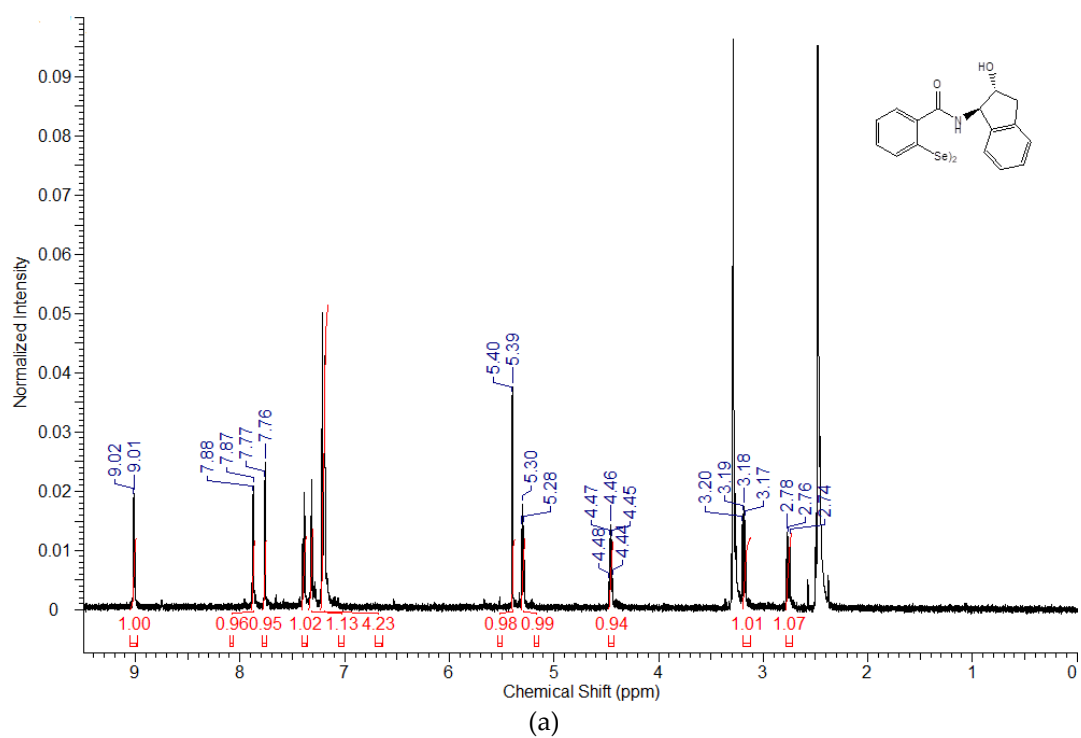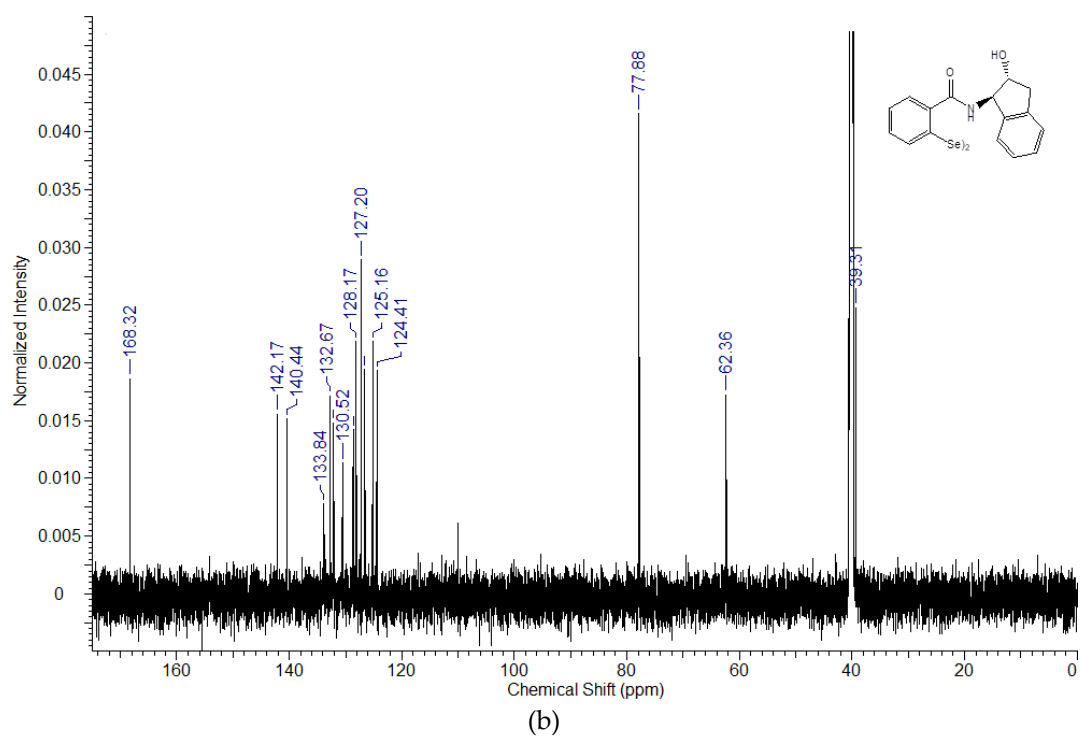

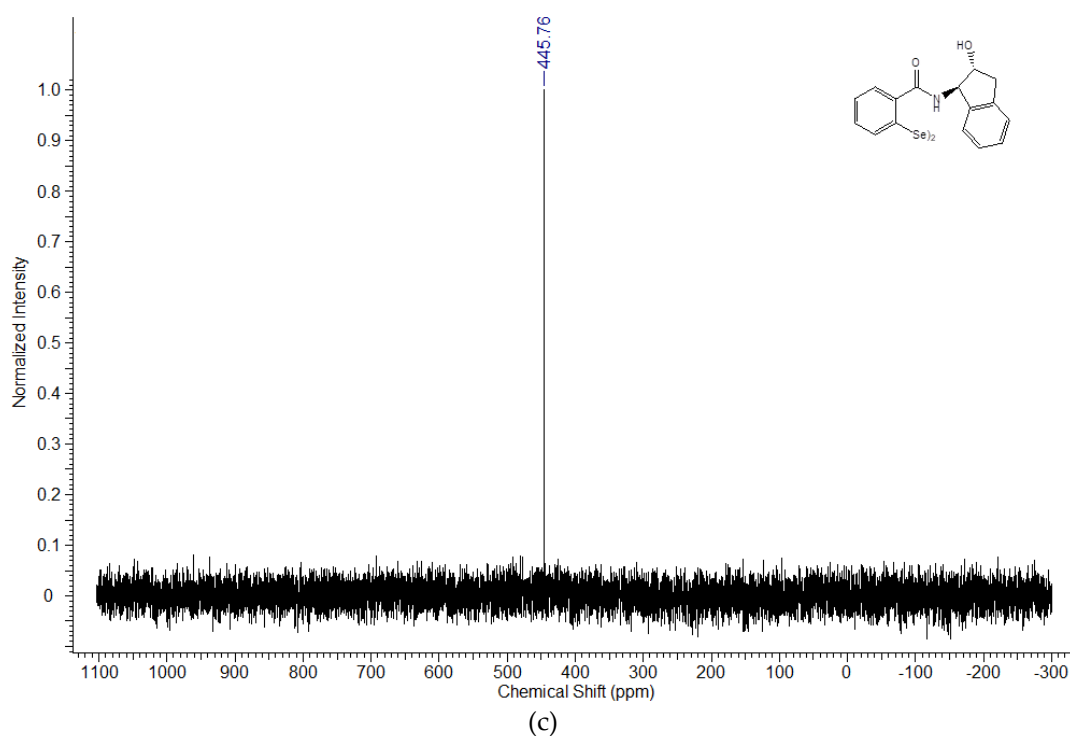

**Figure S28.** (a)  $^1\text{H}$  NMR, (b)  $^{13}\text{C}$  NMR, and (c)  $^{77}\text{Se}$  NMR spectra of 2,2'-diselenobis[*N*-(1*R*,2*R*)-(-)-*trans*-2-hydroxy-1-indanylbezamide] **31b**.

### 3. Crystallographic data of benzoselenazolo-3(2H)-ones **24a** and **25a**

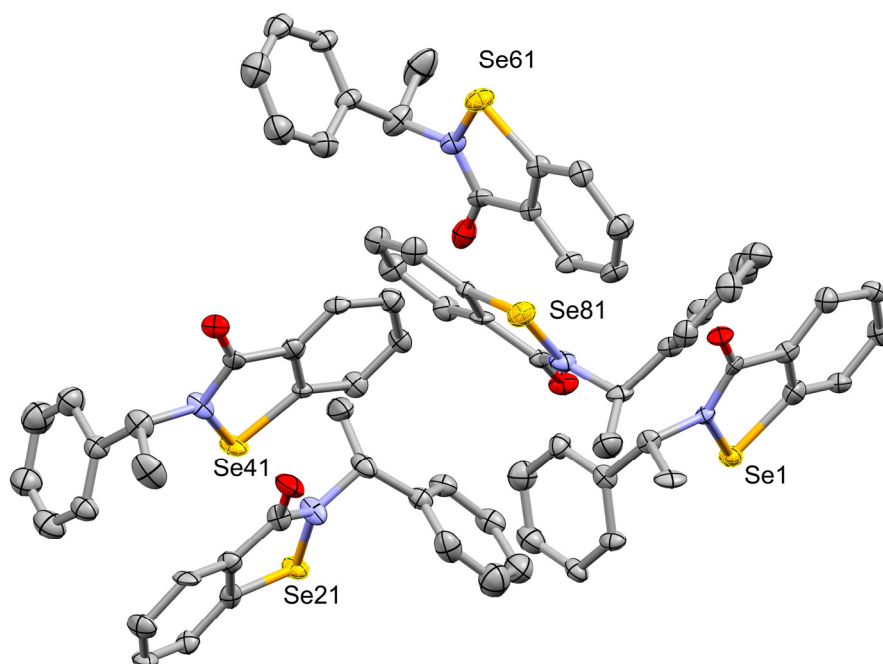

**Figure S29.** Asymmetric part of the structure **24a**. Selenium atoms are labelled to identify molecules 1-5. ADPs are plotted at 50% probability level. Hydrogen atoms are omitted for clarity.

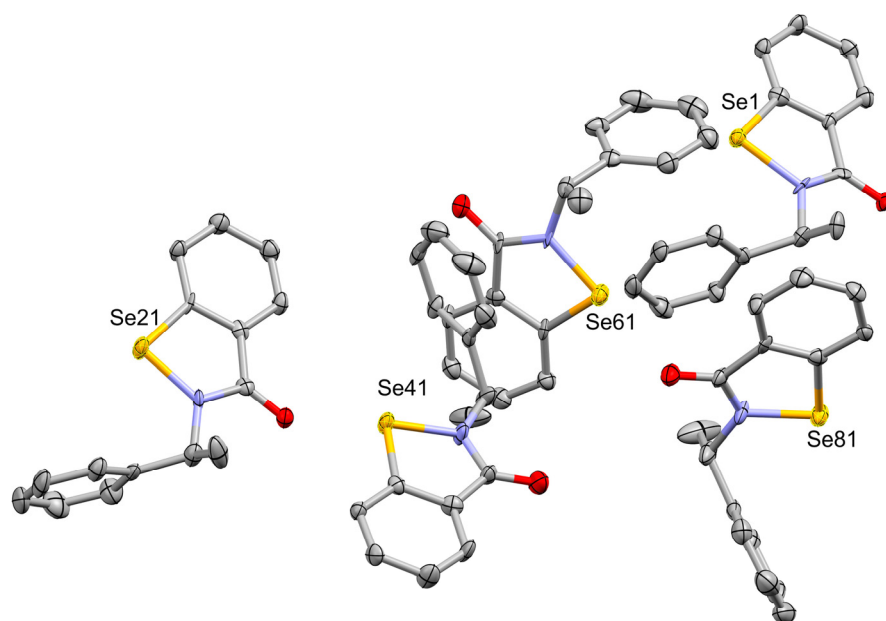

**Figure S30.** Asymmetric part of the structure **25a**. Selenium atoms are labelled to identify molecules 1-5. ADPs are plotted at 50% probability level. Hydrogen atoms are omitted for clarity.

**Table S1.** Crystal data and structure refinement for **24a**.

| Identification code             | <b>24a</b>                                                |
|---------------------------------|-----------------------------------------------------------|
| Empirical formula               | C15 H13 N O Se                                            |
| Formula weight                  | 302.22                                                    |
| Temperature                     | 100(2) K                                                  |
| Wavelength                      | 1.54184 Å                                                 |
| Crystal system                  | Orthorhombic                                              |
| Space group                     | P2 <sub>1</sub> 2 <sub>1</sub> 2 <sub>1</sub>             |
| Unit cell dimensions            | a = 10.0996(2) Å<br>b = 52.3461(11) Å<br>c = 12.6231(3) Å |
| Volume                          | 6673.5(2) Å <sup>3</sup>                                  |
| Z                               | 20                                                        |
| Density (calculated)            | 1.504 Mg/m <sup>3</sup>                                   |
| Absorption coefficient          | 3.696 mm <sup>-1</sup>                                    |
| F(000)                          | 3040                                                      |
| Crystal size                    | 0.138 x 0.110 x 0.065 mm <sup>3</sup>                     |
| Theta range for data collection | 3.377 to 77.944°.                                         |
| Index ranges                    | -12 ≤ h ≤ 12, -66 ≤ k ≤ 47, -15 ≤ l ≤ 15                  |
| Reflections collected           | 85045                                                     |
| Independent reflections         | 13902 [R(int) = 0.0918]                                   |
| Completeness to theta = 67.684° | 99.9 %                                                    |
| Absorption correction           | Semi-empirical from equivalents                           |

|                                      |                                       |
|--------------------------------------|---------------------------------------|
| Max. and min. transmission           | 1.00000 and 0.62936                   |
| Refinement method                    | Full-matrix least-squares on $F^2$    |
| Data / restraints / parameters       | 13902 / 540 / 811                     |
| Goodness-of-fit on $F^2$             | 1.140                                 |
| Final R indices [ $I > 2\sigma(I)$ ] | $R1 = 0.1055$ , $wR2 = 0.2987$        |
| R indices (all data)                 | $R1 = 0.1079$ , $wR2 = 0.3013$        |
| Absolute structure parameter         | 0.042(10)                             |
| Extinction coefficient               | n/a                                   |
| Largest diff. peak and hole          | 3.609 and -2.148 e. $\text{\AA}^{-3}$ |

**Table S2.** Bond lengths [ $\text{\AA}$ ] and angles [ $^\circ$ ] for **24a**.

|              |           |
|--------------|-----------|
| Se(1)-C(10)  | 1.91(2)   |
| Se(1)-N(2)   | 1.932(14) |
| N(2)-C(3)    | 1.31(2)   |
| N(2)-C(11)   | 1.51(2)   |
| C(3)-O(4)    | 1.19(2)   |
| C(3)-C(5)    | 1.52(3)   |
| C(5)-C(10)   | 1.39(3)   |
| C(5)-C(6)    | 1.40(3)   |
| C(6)-C(7)    | 1.39(3)   |
| C(7)-C(8)    | 1.39(3)   |
| C(8)-C(9)    | 1.40(3)   |
| C(9)-C(10)   | 1.37(3)   |
| C(11)-C(12)  | 1.53(3)   |
| C(11)-C(13)  | 1.54(3)   |
| C(13)-C(14)  | 1.37(3)   |
| C(13)-C(18)  | 1.40(3)   |
| C(14)-C(15)  | 1.40(3)   |
| C(15)-C(16)  | 1.40(3)   |
| C(16)-C(17)  | 1.35(3)   |
| C(17)-C(18)  | 1.37(3)   |
| Se(21)-C(30) | 1.882(19) |
| Se(21)-N(22) | 1.900(15) |
| N(22)-C(23)  | 1.36(2)   |
| N(22)-C(31)  | 1.47(3)   |
| C(23)-O(24)  | 1.23(3)   |
| C(23)-C(25)  | 1.43(3)   |
| C(25)-C(26)  | 1.31(3)   |
| C(25)-C(30)  | 1.47(3)   |
| C(26)-C(27)  | 1.42(3)   |
| C(27)-C(28)  | 1.39(3)   |
| C(28)-C(29)  | 1.38(3)   |
| C(29)-C(30)  | 1.38(3)   |
| C(31)-C(32)  | 1.52(4)   |
| C(31)-C(33)  | 1.52(3)   |
| C(33)-C(34)  | 1.36(3)   |
| C(33)-C(38)  | 1.39(3)   |

|              |           |
|--------------|-----------|
| C(34)-C(35)  | 1.40(3)   |
| C(35)-C(36)  | 1.39(4)   |
| C(36)-C(37)  | 1.39(4)   |
| C(37)-C(38)  | 1.33(4)   |
| Se(41)-N(42) | 1.858(17) |
| Se(41)-C(50) | 1.887(17) |
| N(42)-C(43)  | 1.33(2)   |
| N(42)-C(51)  | 1.48(3)   |
| C(43)-O(44)  | 1.26(2)   |
| C(43)-C(45)  | 1.46(3)   |
| C(45)-C(46)  | 1.36(3)   |
| C(45)-C(50)  | 1.44(3)   |
| C(46)-C(47)  | 1.40(3)   |
| C(47)-C(48)  | 1.40(3)   |
| C(48)-C(49)  | 1.39(3)   |
| C(49)-C(50)  | 1.38(2)   |
| C(51)-C(52)  | 1.50(3)   |
| C(51)-C(53)  | 1.55(3)   |
| C(53)-C(54)  | 1.38(3)   |
| C(53)-C(58)  | 1.40(3)   |
| C(54)-C(55)  | 1.38(3)   |
| C(55)-C(56)  | 1.35(4)   |
| C(56)-C(57)  | 1.39(4)   |
| C(57)-C(58)  | 1.35(4)   |
| Se(61)-N(62) | 1.891(16) |
| Se(61)-C(70) | 1.905(18) |
| N(62)-C(63)  | 1.33(2)   |
| N(62)-C(71)  | 1.47(3)   |
| C(63)-O(64)  | 1.23(2)   |
| C(63)-C(65)  | 1.49(2)   |
| C(65)-C(70)  | 1.35(2)   |
| C(65)-C(66)  | 1.38(3)   |
| C(66)-C(67)  | 1.41(3)   |
| C(67)-C(68)  | 1.39(3)   |
| C(68)-C(69)  | 1.41(3)   |
| C(69)-C(70)  | 1.40(3)   |
| C(71)-C(73)  | 1.50(3)   |
| C(71)-C(72)  | 1.55(4)   |
| C(73)-C(74)  | 1.36(3)   |
| C(73)-C(78)  | 1.40(3)   |
| C(74)-C(75)  | 1.39(3)   |
| C(75)-C(76)  | 1.35(4)   |
| C(76)-C(77)  | 1.37(4)   |
| C(77)-C(78)  | 1.37(3)   |
| Se(81)-C(90) | 1.877(17) |
| Se(81)-N(82) | 1.879(17) |
| N(82)-C(83)  | 1.34(2)   |
| N(82)-C(91)  | 1.44(3)   |
| C(83)-O(84)  | 1.27(2)   |

|                    |           |
|--------------------|-----------|
| C(83)-C(85)        | 1.51(2)   |
| C(85)-C(86)        | 1.38(3)   |
| C(85)-C(90)        | 1.45(2)   |
| C(86)-C(87)        | 1.45(3)   |
| C(87)-C(88)        | 1.36(3)   |
| C(88)-C(89)        | 1.40(3)   |
| C(89)-C(90)        | 1.37(3)   |
| C(91)-C(92)        | 1.52(3)   |
| C(91)-C(93)        | 1.53(3)   |
| C(93)-C(98)        | 1.39(3)   |
| C(93)-C(94)        | 1.40(3)   |
| C(94)-C(95)        | 1.38(3)   |
| C(95)-C(96)        | 1.37(3)   |
| C(96)-C(97)        | 1.40(4)   |
| C(97)-C(98)        | 1.35(3)   |
| C(10)-Se(1)-N(2)   | 83.0(8)   |
| C(3)-N(2)-C(11)    | 121.2(15) |
| C(3)-N(2)-Se(1)    | 120.6(13) |
| C(11)-N(2)-Se(1)   | 118.3(11) |
| O(4)-C(3)-N(2)     | 125.1(19) |
| O(4)-C(3)-C(5)     | 127.7(18) |
| N(2)-C(3)-C(5)     | 107.1(16) |
| C(10)-C(5)-C(6)    | 120.7(19) |
| C(10)-C(5)-C(3)    | 117.6(18) |
| C(6)-C(5)-C(3)     | 121.7(17) |
| C(7)-C(6)-C(5)     | 118(2)    |
| C(8)-C(7)-C(6)     | 121(2)    |
| C(7)-C(8)-C(9)     | 120(2)    |
| C(10)-C(9)-C(8)    | 119(2)    |
| C(9)-C(10)-C(5)    | 121(2)    |
| C(9)-C(10)-Se(1)   | 127.0(17) |
| C(5)-C(10)-Se(1)   | 111.6(16) |
| N(2)-C(11)-C(12)   | 110.4(16) |
| N(2)-C(11)-C(13)   | 111.0(14) |
| C(12)-C(11)-C(13)  | 114.0(16) |
| C(14)-C(13)-C(18)  | 118.6(18) |
| C(14)-C(13)-C(11)  | 119.9(18) |
| C(18)-C(13)-C(11)  | 121.5(17) |
| C(13)-C(14)-C(15)  | 121(2)    |
| C(16)-C(15)-C(14)  | 118(2)    |
| C(17)-C(16)-C(15)  | 120(2)    |
| C(16)-C(17)-C(18)  | 121(2)    |
| C(17)-C(18)-C(13)  | 120.5(19) |
| C(30)-Se(21)-N(22) | 84.8(8)   |
| C(23)-N(22)-C(31)  | 125.1(16) |
| C(23)-N(22)-Se(21) | 116.3(13) |
| C(31)-N(22)-Se(21) | 118.5(12) |
| O(24)-C(23)-N(22)  | 121.6(19) |
| O(24)-C(23)-C(25)  | 125.6(18) |

|                    |           |
|--------------------|-----------|
| N(22)-C(23)-C(25)  | 112.8(17) |
| C(26)-C(25)-C(23)  | 129(2)    |
| C(26)-C(25)-C(30)  | 117.5(19) |
| C(23)-C(25)-C(30)  | 113.5(17) |
| C(25)-C(26)-C(27)  | 123(2)    |
| C(28)-C(27)-C(26)  | 119(2)    |
| C(29)-C(28)-C(27)  | 120.3(19) |
| C(30)-C(29)-C(28)  | 120.0(19) |
| C(29)-C(30)-C(25)  | 120.1(17) |
| C(29)-C(30)-Se(21) | 127.6(15) |
| C(25)-C(30)-Se(21) | 112.3(14) |
| N(22)-C(31)-C(32)  | 110.5(19) |
| N(22)-C(31)-C(33)  | 109.0(17) |
| C(32)-C(31)-C(33)  | 115.5(19) |
| C(34)-C(33)-C(38)  | 118(2)    |
| C(34)-C(33)-C(31)  | 123.2(19) |
| C(38)-C(33)-C(31)  | 118(2)    |
| C(33)-C(34)-C(35)  | 121(2)    |
| C(36)-C(35)-C(34)  | 119(2)    |
| C(37)-C(36)-C(35)  | 118(2)    |
| C(38)-C(37)-C(36)  | 122(3)    |
| C(37)-C(38)-C(33)  | 121(2)    |
| N(42)-Se(41)-C(50) | 85.4(7)   |
| C(43)-N(42)-C(51)  | 120.7(17) |
| C(43)-N(42)-Se(41) | 117.2(14) |
| C(51)-N(42)-Se(41) | 122.1(13) |
| O(44)-C(43)-N(42)  | 124.1(18) |
| O(44)-C(43)-C(45)  | 123.1(18) |
| N(42)-C(43)-C(45)  | 112.6(18) |
| C(46)-C(45)-C(50)  | 119.0(18) |
| C(46)-C(45)-C(43)  | 127.4(19) |
| C(50)-C(45)-C(43)  | 113.5(17) |
| C(45)-C(46)-C(47)  | 120.6(18) |
| C(46)-C(47)-C(48)  | 119.8(19) |
| C(49)-C(48)-C(47)  | 120.7(19) |
| C(50)-C(49)-C(48)  | 118.8(18) |
| C(49)-C(50)-C(45)  | 120.9(17) |
| C(49)-C(50)-Se(41) | 127.8(14) |
| C(45)-C(50)-Se(41) | 111.2(13) |
| N(42)-C(51)-C(52)  | 109.7(19) |
| N(42)-C(51)-C(53)  | 107.7(16) |
| C(52)-C(51)-C(53)  | 115(2)    |
| C(54)-C(53)-C(58)  | 118(2)    |
| C(54)-C(53)-C(51)  | 124(2)    |
| C(58)-C(53)-C(51)  | 118.1(19) |
| C(53)-C(54)-C(55)  | 120(2)    |
| C(56)-C(55)-C(54)  | 122(2)    |
| C(55)-C(56)-C(57)  | 119(2)    |
| C(55)-C(56)-H(56A) | 120.3     |



|                    |           |
|--------------------|-----------|
| C(57)-C(56)-H(56A) | 120.3     |
| C(58)-C(57)-C(56)  | 120(3)    |
| C(57)-C(58)-C(53)  | 121(2)    |
| N(62)-Se(61)-C(70) | 83.7(7)   |
| C(63)-N(62)-C(71)  | 122.0(17) |
| C(63)-N(62)-Se(61) | 118.3(13) |
| C(71)-N(62)-Se(61) | 119.0(13) |
| O(64)-C(63)-N(62)  | 125.6(18) |
| O(64)-C(63)-C(65)  | 125.6(17) |
| N(62)-C(63)-C(65)  | 108.7(16) |
| C(70)-C(65)-C(66)  | 118.9(17) |
| C(70)-C(65)-C(63)  | 117.0(17) |
| C(66)-C(65)-C(63)  | 124.1(17) |
| C(65)-C(66)-C(67)  | 120.6(18) |
| C(68)-C(67)-C(66)  | 119.0(19) |
| C(67)-C(68)-C(69)  | 121(2)    |
| C(70)-C(69)-C(68)  | 117.1(19) |
| C(65)-C(70)-C(69)  | 123.5(18) |
| C(65)-C(70)-Se(61) | 112.2(13) |
| C(69)-C(70)-Se(61) | 124.1(14) |
| N(62)-C(71)-C(73)  | 110.3(17) |
| N(62)-C(71)-C(72)  | 107(2)    |
| C(73)-C(71)-C(72)  | 114(2)    |
| C(74)-C(73)-C(78)  | 118(2)    |
| C(74)-C(73)-C(71)  | 125(2)    |
| C(78)-C(73)-C(71)  | 117.4(19) |
| C(73)-C(74)-C(75)  | 120(2)    |
| C(76)-C(75)-C(74)  | 123(2)    |
| C(75)-C(76)-C(77)  | 118(2)    |
| C(76)-C(77)-C(78)  | 120(3)    |
| C(77)-C(78)-C(73)  | 121(2)    |
| C(90)-Se(81)-N(82) | 86.5(7)   |
| C(83)-N(82)-C(91)  | 122.6(16) |
| C(83)-N(82)-Se(81) | 117.7(13) |
| C(91)-N(82)-Se(81) | 119.5(13) |
| O(84)-C(83)-N(82)  | 126.6(16) |
| O(84)-C(83)-C(85)  | 122.9(15) |
| N(82)-C(83)-C(85)  | 110.4(15) |
| C(86)-C(85)-C(90)  | 121.8(17) |
| C(86)-C(85)-C(83)  | 124.0(16) |
| C(90)-C(85)-C(83)  | 114.2(15) |
| C(85)-C(86)-C(87)  | 115.0(18) |
| C(88)-C(87)-C(86)  | 123(2)    |
| C(87)-C(88)-C(89)  | 121(2)    |
| C(90)-C(89)-C(88)  | 119.0(19) |
| C(89)-C(90)-C(85)  | 120.3(17) |
| C(89)-C(90)-Se(81) | 128.6(14) |
| C(85)-C(90)-Se(81) | 111.1(12) |
| N(82)-C(91)-C(92)  | 111.1(18) |

|                   |           |
|-------------------|-----------|
| N(82)-C(91)-C(93) | 109.8(15) |
| C(92)-C(91)-C(93) | 114.3(18) |
| C(98)-C(93)-C(94) | 117.7(19) |
| C(98)-C(93)-C(91) | 118.6(19) |
| C(94)-C(93)-C(91) | 123.5(18) |
| C(95)-C(94)-C(93) | 121(2)    |
| C(96)-C(95)-C(94) | 118(2)    |
| C(95)-C(96)-C(97) | 122(2)    |
| C(98)-C(97)-C(96) | 119(2)    |
| C(97)-C(98)-C(93) | 122(2)    |

**Table S3.** Torsion angles [°] for **24a**.

|                          |            |
|--------------------------|------------|
| C(11)-N(2)-C(3)-O(4)     | -3(3)      |
| Se(1)-N(2)-C(3)-O(4)     | 176.7(15)  |
| C(11)-N(2)-C(3)-C(5)     | -179.0(14) |
| Se(1)-N(2)-C(3)-C(5)     | 0.5(19)    |
| O(4)-C(3)-C(5)-C(10)     | -178.6(19) |
| N(2)-C(3)-C(5)-C(10)     | -3(2)      |
| O(4)-C(3)-C(5)-C(6)      | 2(3)       |
| N(2)-C(3)-C(5)-C(6)      | 177.9(17)  |
| C(10)-C(5)-C(6)-C(7)     | -1(3)      |
| C(3)-C(5)-C(6)-C(7)      | 178.8(17)  |
| C(5)-C(6)-C(7)-C(8)      | 2(3)       |
| C(6)-C(7)-C(8)-C(9)      | 0(3)       |
| C(7)-C(8)-C(9)-C(10)     | -2(3)      |
| C(8)-C(9)-C(10)-C(5)     | 3(3)       |
| C(8)-C(9)-C(10)-Se(1)    | 177.8(16)  |
| C(6)-C(5)-C(10)-C(9)     | -2(3)      |
| C(3)-C(5)-C(10)-C(9)     | 178.7(17)  |
| C(6)-C(5)-C(10)-Se(1)    | -177.1(14) |
| C(3)-C(5)-C(10)-Se(1)    | 3(2)       |
| C(3)-N(2)-C(11)-C(12)    | -78(2)     |
| Se(1)-N(2)-C(11)-C(12)   | 102.1(15)  |
| C(3)-N(2)-C(11)-C(13)    | 154.3(16)  |
| Se(1)-N(2)-C(11)-C(13)   | -25.3(19)  |
| N(2)-C(11)-C(13)-C(14)   | -86(2)     |
| C(12)-C(11)-C(13)-C(14)  | 148.5(19)  |
| N(2)-C(11)-C(13)-C(18)   | 90(2)      |
| C(12)-C(11)-C(13)-C(18)  | -35(2)     |
| C(18)-C(13)-C(14)-C(15)  | -1(3)      |
| C(11)-C(13)-C(14)-C(15)  | 175.5(19)  |
| C(13)-C(14)-C(15)-C(16)  | 1(3)       |
| C(14)-C(15)-C(16)-C(17)  | -2(3)      |
| C(15)-C(16)-C(17)-C(18)  | 2(3)       |
| C(16)-C(17)-C(18)-C(13)  | -2(3)      |
| C(14)-C(13)-C(18)-C(17)  | 1(3)       |
| C(11)-C(13)-C(18)-C(17)  | -174.9(18) |
| C(31)-N(22)-C(23)-O(24)  | -3(3)      |
| Se(21)-N(22)-C(23)-O(24) | 175.0(17)  |

|                          |            |
|--------------------------|------------|
| C(31)-N(22)-C(23)-C(25)  | 176(2)     |
| Se(21)-N(22)-C(23)-C(25) | -7(2)      |
| O(24)-C(23)-C(25)-C(26)  | 1(4)       |
| N(22)-C(23)-C(25)-C(26)  | -177(2)    |
| O(24)-C(23)-C(25)-C(30)  | -177(2)    |
| N(22)-C(23)-C(25)-C(30)  | 5(3)       |
| C(23)-C(25)-C(26)-C(27)  | -177(2)    |
| C(30)-C(25)-C(26)-C(27)  | 1(3)       |
| C(25)-C(26)-C(27)-C(28)  | 2(4)       |
| C(26)-C(27)-C(28)-C(29)  | -5(3)      |
| C(27)-C(28)-C(29)-C(30)  | 5(3)       |
| C(28)-C(29)-C(30)-C(25)  | -1(3)      |
| C(28)-C(29)-C(30)-Se(21) | 176.3(15)  |
| C(26)-C(25)-C(30)-C(29)  | -1(3)      |
| C(23)-C(25)-C(30)-C(29)  | 177.1(18)  |
| C(26)-C(25)-C(30)-Se(21) | -179.5(16) |
| C(23)-C(25)-C(30)-Se(21) | -1(2)      |
| N(22)-Se(21)-C(30)-C(29) | 180.0(19)  |
| N(22)-Se(21)-C(30)-C(25) | -2.1(14)   |
| C(23)-N(22)-C(31)-C(32)  | -100(3)    |
| Se(21)-N(22)-C(31)-C(32) | 83(2)      |
| C(23)-N(22)-C(31)-C(33)  | 132(2)     |
| Se(21)-N(22)-C(31)-C(33) | -45(2)     |
| N(22)-C(31)-C(33)-C(34)  | 115(2)     |
| C(32)-C(31)-C(33)-C(34)  | -10(3)     |
| N(22)-C(31)-C(33)-C(38)  | -60(3)     |
| C(32)-C(31)-C(33)-C(38)  | 175(2)     |
| C(38)-C(33)-C(34)-C(35)  | 3(3)       |
| C(31)-C(33)-C(34)-C(35)  | -173(2)    |
| C(33)-C(34)-C(35)-C(36)  | -4(3)      |
| C(34)-C(35)-C(36)-C(37)  | 4(4)       |
| C(35)-C(36)-C(37)-C(38)  | -2(4)      |
| C(36)-C(37)-C(38)-C(33)  | 1(4)       |
| C(34)-C(33)-C(38)-C(37)  | -1(3)      |
| C(31)-C(33)-C(38)-C(37)  | 175(2)     |
| C(50)-Se(41)-N(42)-C(43) | 0.6(15)    |
| C(50)-Se(41)-N(42)-C(51) | -179.3(16) |
| C(51)-N(42)-C(43)-O(44)  | -5(3)      |
| Se(41)-N(42)-C(43)-O(44) | 175.2(15)  |
| C(51)-N(42)-C(43)-C(45)  | 179.4(18)  |
| Se(41)-N(42)-C(43)-C(45) | 0(2)       |
| O(44)-C(43)-C(45)-C(46)  | 3(3)       |
| N(42)-C(43)-C(45)-C(46)  | 178.8(19)  |
| O(44)-C(43)-C(45)-C(50)  | -175.7(17) |
| N(42)-C(43)-C(45)-C(50)  | 0(2)       |
| C(50)-C(45)-C(46)-C(47)  | -1(3)      |
| C(43)-C(45)-C(46)-C(47)  | -179.4(19) |
| C(45)-C(46)-C(47)-C(48)  | 1(3)       |
| C(46)-C(47)-C(48)-C(49)  | 1(3)       |

|                          |            |
|--------------------------|------------|
| C(47)-C(48)-C(49)-C(50)  | -2(3)      |
| C(48)-C(49)-C(50)-C(45)  | 3(3)       |
| C(48)-C(49)-C(50)-Se(41) | 179.6(15)  |
| C(46)-C(45)-C(50)-C(49)  | -1(3)      |
| C(43)-C(45)-C(50)-C(49)  | 177.8(17)  |
| C(46)-C(45)-C(50)-Se(41) | -178.5(14) |
| C(43)-C(45)-C(50)-Se(41) | 0(2)       |
| N(42)-Se(41)-C(50)-C(49) | -177.7(18) |
| N(42)-Se(41)-C(50)-C(45) | -0.5(14)   |
| C(43)-N(42)-C(51)-C(52)  | -86(3)     |
| Se(41)-N(42)-C(51)-C(52) | 94(2)      |
| C(43)-N(42)-C(51)-C(53)  | 148.1(18)  |
| Se(41)-N(42)-C(51)-C(53) | -32(2)     |
| N(42)-C(51)-C(53)-C(54)  | 103(2)     |
| C(52)-C(51)-C(53)-C(54)  | -20(3)     |
| N(42)-C(51)-C(53)-C(58)  | -75(2)     |
| C(52)-C(51)-C(53)-C(58)  | 162(2)     |
| C(58)-C(53)-C(54)-C(55)  | 3(3)       |
| C(51)-C(53)-C(54)-C(55)  | -176(2)    |
| C(53)-C(54)-C(55)-C(56)  | -1(4)      |
| C(54)-C(55)-C(56)-C(57)  | 0(4)       |
| C(55)-C(56)-C(57)-C(58)  | -2(4)      |
| C(56)-C(57)-C(58)-C(53)  | 4(4)       |
| C(54)-C(53)-C(58)-C(57)  | -4(4)      |
| C(51)-C(53)-C(58)-C(57)  | 174(2)     |
| C(70)-Se(61)-N(62)-C(63) | 3.7(15)    |
| C(70)-Se(61)-N(62)-C(71) | 174.7(17)  |
| C(71)-N(62)-C(63)-O(64)  | 1(3)       |
| Se(61)-N(62)-C(63)-O(64) | 172.2(16)  |
| C(71)-N(62)-C(63)-C(65)  | -174.5(18) |
| Se(61)-N(62)-C(63)-C(65) | -4(2)      |
| O(64)-C(63)-C(65)-C(70)  | -174.3(19) |
| N(62)-C(63)-C(65)-C(70)  | 2(2)       |
| O(64)-C(63)-C(65)-C(66)  | 5(3)       |
| N(62)-C(63)-C(65)-C(66)  | -179.0(18) |
| C(70)-C(65)-C(66)-C(67)  | 2(3)       |
| C(63)-C(65)-C(66)-C(67)  | -177.6(18) |
| C(65)-C(66)-C(67)-C(68)  | 0(3)       |
| C(66)-C(67)-C(68)-C(69)  | 1(3)       |
| C(67)-C(68)-C(69)-C(70)  | -3(3)      |
| C(66)-C(65)-C(70)-C(69)  | -4(3)      |
| C(63)-C(65)-C(70)-C(69)  | 175.8(17)  |
| C(66)-C(65)-C(70)-Se(61) | -178.3(15) |
| C(63)-C(65)-C(70)-Se(61) | 1(2)       |
| C(68)-C(69)-C(70)-C(65)  | 4(3)       |
| C(68)-C(69)-C(70)-Se(61) | 178.0(15)  |
| C(63)-N(62)-C(71)-C(73)  | 131(2)     |
| Se(61)-N(62)-C(71)-C(73) | -40(2)     |
| C(63)-N(62)-C(71)-C(72)  | -105(2)    |

|                          |            |
|--------------------------|------------|
| Se(61)-N(62)-C(71)-C(72) | 85(2)      |
| N(62)-C(71)-C(73)-C(74)  | 121(2)     |
| C(72)-C(71)-C(73)-C(74)  | 0(3)       |
| N(62)-C(71)-C(73)-C(78)  | -61(3)     |
| C(72)-C(71)-C(73)-C(78)  | 178(2)     |
| C(78)-C(73)-C(74)-C(75)  | 3(3)       |
| C(71)-C(73)-C(74)-C(75)  | -179(2)    |
| C(73)-C(74)-C(75)-C(76)  | -2(4)      |
| C(74)-C(75)-C(76)-C(77)  | 0(4)       |
| C(75)-C(76)-C(77)-C(78)  | -1(4)      |
| C(76)-C(77)-C(78)-C(73)  | 2(4)       |
| C(74)-C(73)-C(78)-C(77)  | -3(3)      |
| C(71)-C(73)-C(78)-C(77)  | 178(2)     |
| C(90)-Se(81)-N(82)-C(83) | 0.6(15)    |
| C(90)-Se(81)-N(82)-C(91) | 175.5(15)  |
| C(91)-N(82)-C(83)-O(84)  | 1(3)       |
| Se(81)-N(82)-C(83)-O(84) | 175.5(15)  |
| C(91)-N(82)-C(83)-C(85)  | -176.4(16) |
| Se(81)-N(82)-C(83)-C(85) | -2(2)      |
| O(84)-C(83)-C(85)-C(86)  | 6(3)       |
| N(82)-C(83)-C(85)-C(86)  | -176.4(18) |
| O(84)-C(83)-C(85)-C(90)  | -175.0(16) |
| N(82)-C(83)-C(85)-C(90)  | 2(2)       |
| C(90)-C(85)-C(86)-C(87)  | 2(3)       |
| C(83)-C(85)-C(86)-C(87)  | -179.8(17) |
| C(85)-C(86)-C(87)-C(88)  | -2(3)      |
| C(86)-C(87)-C(88)-C(89)  | 1(4)       |
| C(87)-C(88)-C(89)-C(90)  | 0(3)       |
| C(88)-C(89)-C(90)-C(85)  | 0(3)       |
| C(88)-C(89)-C(90)-Se(81) | -177.4(15) |
| C(86)-C(85)-C(90)-C(89)  | -1(3)      |
| C(83)-C(85)-C(90)-C(89)  | -179.5(16) |
| C(86)-C(85)-C(90)-Se(81) | 176.8(15)  |
| C(83)-C(85)-C(90)-Se(81) | -1.8(19)   |
| N(82)-Se(81)-C(90)-C(89) | 178.2(18)  |
| N(82)-Se(81)-C(90)-C(85) | 0.8(13)    |
| C(83)-N(82)-C(91)-C(92)  | -121(2)    |
| Se(81)-N(82)-C(91)-C(92) | 65(2)      |
| C(83)-N(82)-C(91)-C(93)  | 112(2)     |
| Se(81)-N(82)-C(91)-C(93) | -63(2)     |
| N(82)-C(91)-C(93)-C(98)  | -76(2)     |
| C(92)-C(91)-C(93)-C(98)  | 158.4(19)  |
| N(82)-C(91)-C(93)-C(94)  | 99(2)      |
| C(92)-C(91)-C(93)-C(94)  | -26(3)     |
| C(98)-C(93)-C(94)-C(95)  | 0(3)       |
| C(91)-C(93)-C(94)-C(95)  | -176(2)    |
| C(93)-C(94)-C(95)-C(96)  | 0(3)       |
| C(94)-C(95)-C(96)-C(97)  | -1(4)      |
| C(95)-C(96)-C(97)-C(98)  | 3(4)       |

|                         |        |
|-------------------------|--------|
| C(96)-C(97)-C(98)-C(93) | -3(4)  |
| C(94)-C(93)-C(98)-C(97) | 2(3)   |
| C(91)-C(93)-C(98)-C(97) | 178(2) |

**Table S4.** Hydrogen bonds for **24a** [Å and °].

| D-H...A                | d(D-H) | d(H...A) | d(D...A) | <(DHA) |
|------------------------|--------|----------|----------|--------|
| C(9)-H(9A)...O(4)#1    | 0.95   | 2.27     | 2.95(2)  | 128.1  |
| C(29)-H(29A)...O(44)#2 | 0.95   | 2.36     | 3.05(2)  | 128.5  |
| C(49)-H(49A)...O(24)   | 0.95   | 2.35     | 3.03(3)  | 127.6  |
| C(69)-H(69A)...O(84)#3 | 0.95   | 2.45     | 3.16(3)  | 131.6  |
| C(89)-H(89A)...O(64)   | 0.95   | 2.44     | 3.11(3)  | 127.4  |

Symmetry transformations used to generate equivalent atoms:

#1 -x+3/2,-y+1,z+1/2 #2 x,y,z+1 #3 x,y,z-1 .

**Table S5.** Crystal data and structure refinement for **25a**.

|                                   |                                                           |
|-----------------------------------|-----------------------------------------------------------|
| Identification code               | <b>25a</b>                                                |
| Empirical formula                 | C15 H13 N O Se                                            |
| Formula weight                    | 302.22                                                    |
| Temperature                       | 100(2) K                                                  |
| Wavelength                        | 1.54184 Å                                                 |
| Crystal system                    | Orthorhombic                                              |
| Space group                       | P2 <sub>1</sub> 2 <sub>1</sub> 2 <sub>1</sub>             |
| Unit cell dimensions              | a = 10.1164(3) Å<br>b = 12.6176(4) Å<br>c = 52.3764(15) Å |
| Volume                            | 6685.6(3) Å <sup>3</sup>                                  |
| Z                                 | 20                                                        |
| Density (calculated)              | 1.501 Mg/m <sup>3</sup>                                   |
| Absorption coefficient            | 3.690 mm <sup>-1</sup>                                    |
| F(000)                            | 3040                                                      |
| Crystal size                      | 0.175 x 0.102 x 0.051 mm <sup>3</sup>                     |
| Theta range for data collection   | 3.375 to 77.905°                                          |
| Index ranges                      | -12 ≤ h ≤ 12, -15 ≤ k ≤ 13, -64 ≤ l ≤ 25                  |
| Reflections collected             | 31953                                                     |
| Independent reflections           | 12315 [R(int) = 0.0329]                                   |
| Completeness to theta = 67.684°   | 99.6 %                                                    |
| Absorption correction             | Semi-empirical from equivalents                           |
| Max. and min. transmission        | 1.00000 and 0.87047                                       |
| Refinement method                 | Full-matrix least-squares on F <sup>2</sup>               |
| Data / restraints / parameters    | 12315 / 6 / 816                                           |
| Goodness-of-fit on F <sup>2</sup> | 1.096                                                     |
| Final R indices [I > 2σ(I)]       | R1 = 0.0492, wR2 = 0.1213                                 |
| R indices (all data)              | R1 = 0.0502, wR2 = 0.1218                                 |
| Absolute structure parameter      | 0.011(9)                                                  |
| Extinction coefficient            | n/a                                                       |

|                             |                                    |
|-----------------------------|------------------------------------|
| Largest diff. peak and hole | 1.291 and -0.900 e.Å <sup>-3</sup> |
|-----------------------------|------------------------------------|

**Table S6.** Bond lengths [Å] and angles [°] for **25a**.

|              |           |
|--------------|-----------|
| Se(1)-C(10)  | 1.900(8)  |
| Se(1)-N(2)   | 1.922(6)  |
| N(2)-C(3)    | 1.289(11) |
| N(2)-C(11)   | 1.492(10) |
| C(3)-O(4)    | 1.248(10) |
| C(3)-C(5)    | 1.493(11) |
| C(5)-C(10)   | 1.388(11) |
| C(5)-C(6)    | 1.401(11) |
| C(6)-C(7)    | 1.370(13) |
| C(7)-C(8)    | 1.396(13) |
| C(8)-C(9)    | 1.386(12) |
| C(9)-C(10)   | 1.391(12) |
| C(11)-C(13)  | 1.519(11) |
| C(11)-C(12)  | 1.531(11) |
| C(13)-C(14)  | 1.388(12) |
| C(13)-C(18)  | 1.397(12) |
| C(14)-C(15)  | 1.393(12) |
| C(15)-C(16)  | 1.393(14) |
| C(16)-C(17)  | 1.364(13) |
| C(17)-C(18)  | 1.388(12) |
| Se(21)-N(22) | 1.877(7)  |
| Se(21)-C(30) | 1.895(8)  |
| N(22)-C(23)  | 1.364(10) |
| N(22)-C(31)  | 1.478(11) |
| C(23)-O(24)  | 1.237(10) |
| C(23)-C(25)  | 1.461(11) |
| C(25)-C(26)  | 1.387(11) |
| C(25)-C(30)  | 1.409(11) |
| C(26)-C(27)  | 1.380(12) |
| C(27)-C(28)  | 1.399(13) |
| C(28)-C(29)  | 1.393(12) |
| C(29)-C(30)  | 1.392(11) |
| C(31)-C(32)  | 1.519(14) |
| C(31)-C(33)  | 1.525(12) |
| C(33)-C(38)  | 1.376(12) |
| C(33)-C(34)  | 1.398(13) |
| C(34)-C(35)  | 1.376(14) |
| C(35)-C(36)  | 1.371(16) |
| C(36)-C(37)  | 1.363(17) |
| C(37)-C(38)  | 1.396(14) |
| Se(41)-C(50) | 1.882(8)  |
| Se(41)-N(42) | 1.890(7)  |
| N(42)-C(43)  | 1.353(11) |
| N(42)-C(51)  | 1.483(11) |

|              |           |
|--------------|-----------|
| C(43)-O(44)  | 1.229(11) |
| C(43)-C(45)  | 1.451(12) |
| C(45)-C(46)  | 1.371(12) |
| C(45)-C(50)  | 1.423(12) |
| C(46)-C(47)  | 1.383(12) |
| C(47)-C(48)  | 1.390(13) |
| C(48)-C(49)  | 1.377(12) |
| C(49)-C(50)  | 1.389(11) |
| C(51)-C(53)  | 1.511(12) |
| C(51)-C(52)  | 1.528(17) |
| C(53)-C(58)  | 1.379(12) |
| C(53)-C(54)  | 1.392(13) |
| C(54)-C(55)  | 1.376(15) |
| C(55)-C(56)  | 1.384(16) |
| C(56)-C(57)  | 1.370(15) |
| C(57)-C(58)  | 1.412(13) |
| Se(61)-N(62) | 1.882(6)  |
| Se(61)-C(70) | 1.887(8)  |
| N(62)-C(63)  | 1.359(10) |
| N(62)-C(71)  | 1.454(11) |
| C(63)-O(64)  | 1.248(9)  |
| C(63)-C(65)  | 1.488(11) |
| C(65)-C(66)  | 1.402(11) |
| C(65)-C(70)  | 1.403(11) |
| C(66)-C(67)  | 1.394(13) |
| C(67)-C(68)  | 1.388(14) |
| C(68)-C(69)  | 1.378(12) |
| C(69)-C(70)  | 1.387(11) |
| C(71)-C(73)  | 1.507(12) |
| C(71)-C(72)  | 1.527(13) |
| C(73)-C(78)  | 1.392(12) |
| C(73)-C(74)  | 1.407(13) |
| C(74)-C(75)  | 1.385(13) |
| C(75)-C(76)  | 1.362(15) |
| C(76)-C(77)  | 1.399(16) |
| C(77)-C(78)  | 1.365(14) |
| Se(81)-N(82) | 1.882(7)  |
| Se(81)-C(90) | 1.905(8)  |
| N(82)-C(83)  | 1.337(11) |
| N(82)-C(91)  | 1.469(11) |
| C(83)-O(84)  | 1.232(10) |
| C(83)-C(85)  | 1.484(11) |
| C(85)-C(90)  | 1.355(12) |
| C(85)-C(86)  | 1.399(12) |
| C(86)-C(87)  | 1.381(13) |
| C(87)-C(88)  | 1.386(14) |
| C(88)-C(89)  | 1.388(13) |
| C(89)-C(90)  | 1.404(11) |
| C(91)-C(93)  | 1.504(12) |



|                    |           |
|--------------------|-----------|
| C(91)-C(92)        | 1.527(17) |
| C(93)-C(98)        | 1.380(12) |
| C(93)-C(94)        | 1.391(14) |
| C(94)-C(95)        | 1.391(14) |
| C(95)-C(96)        | 1.374(17) |
| C(96)-C(97)        | 1.375(16) |
| C(97)-C(98)        | 1.387(14) |
| C(10)-Se(1)-N(2)   | 83.7(3)   |
| C(3)-N(2)-C(11)    | 123.3(6)  |
| C(3)-N(2)-Se(1)    | 117.6(5)  |
| C(11)-N(2)-Se(1)   | 119.0(5)  |
| O(4)-C(3)-N(2)     | 123.6(7)  |
| O(4)-C(3)-C(5)     | 124.8(7)  |
| N(2)-C(3)-C(5)     | 111.4(7)  |
| C(10)-C(5)-C(6)    | 120.2(8)  |
| C(10)-C(5)-C(3)    | 114.9(7)  |
| C(6)-C(5)-C(3)     | 124.9(7)  |
| C(7)-C(6)-C(5)     | 119.1(8)  |
| C(6)-C(7)-C(8)     | 120.7(8)  |
| C(9)-C(8)-C(7)     | 120.7(8)  |
| C(8)-C(9)-C(10)    | 118.7(8)  |
| C(5)-C(10)-C(9)    | 120.7(8)  |
| C(5)-C(10)-Se(1)   | 112.2(6)  |
| C(9)-C(10)-Se(1)   | 127.1(7)  |
| N(2)-C(11)-C(13)   | 111.1(6)  |
| N(2)-C(11)-C(12)   | 109.4(7)  |
| C(13)-C(11)-C(12)  | 114.2(7)  |
| C(14)-C(13)-C(18)  | 119.3(8)  |
| C(14)-C(13)-C(11)  | 119.7(8)  |
| C(18)-C(13)-C(11)  | 121.0(7)  |
| C(13)-C(14)-C(15)  | 120.9(8)  |
| C(16)-C(15)-C(14)  | 119.1(8)  |
| C(17)-C(16)-C(15)  | 120.1(8)  |
| C(16)-C(17)-C(18)  | 121.4(8)  |
| C(17)-C(18)-C(13)  | 119.2(8)  |
| N(22)-Se(21)-C(30) | 84.8(3)   |
| C(23)-N(22)-C(31)  | 121.4(7)  |
| C(23)-N(22)-Se(21) | 117.3(6)  |
| C(31)-N(22)-Se(21) | 121.3(5)  |
| O(24)-C(23)-N(22)  | 123.5(7)  |
| O(24)-C(23)-C(25)  | 126.1(7)  |
| N(22)-C(23)-C(25)  | 110.4(7)  |
| C(26)-C(25)-C(30)  | 119.0(8)  |
| C(26)-C(25)-C(23)  | 125.4(8)  |
| C(30)-C(25)-C(23)  | 115.5(7)  |
| C(27)-C(26)-C(25)  | 119.5(8)  |
| C(26)-C(27)-C(28)  | 121.2(8)  |
| C(29)-C(28)-C(27)  | 120.3(8)  |
| C(30)-C(29)-C(28)  | 117.9(8)  |

|                    |           |
|--------------------|-----------|
| C(29)-C(30)-C(25)  | 121.9(7)  |
| C(29)-C(30)-Se(21) | 126.1(6)  |
| C(25)-C(30)-Se(21) | 111.9(6)  |
| N(22)-C(31)-C(32)  | 110.3(8)  |
| N(22)-C(31)-C(33)  | 108.2(7)  |
| C(32)-C(31)-C(33)  | 115.3(8)  |
| C(38)-C(33)-C(34)  | 118.1(8)  |
| C(38)-C(33)-C(31)  | 123.3(9)  |
| C(34)-C(33)-C(31)  | 118.6(8)  |
| C(35)-C(34)-C(33)  | 121.2(10) |
| C(36)-C(35)-C(34)  | 119.9(10) |
| C(37)-C(36)-C(35)  | 119.9(9)  |
| C(36)-C(37)-C(38)  | 120.7(9)  |
| C(33)-C(38)-C(37)  | 120.1(9)  |
| C(50)-Se(41)-N(42) | 84.9(3)   |
| C(43)-N(42)-C(51)  | 124.6(7)  |
| C(43)-N(42)-Se(41) | 116.6(6)  |
| C(51)-N(42)-Se(41) | 118.7(6)  |
| O(44)-C(43)-N(42)  | 122.0(8)  |
| O(44)-C(43)-C(45)  | 126.7(8)  |
| N(42)-C(43)-C(45)  | 111.3(7)  |
| C(46)-C(45)-C(50)  | 119.4(8)  |
| C(46)-C(45)-C(43)  | 125.5(8)  |
| C(50)-C(45)-C(43)  | 115.1(7)  |
| C(45)-C(46)-C(47)  | 120.2(8)  |
| C(46)-C(47)-C(48)  | 120.3(9)  |
| C(49)-C(48)-C(47)  | 120.8(8)  |
| C(48)-C(49)-C(50)  | 119.2(8)  |
| C(49)-C(50)-C(45)  | 120.1(8)  |
| C(49)-C(50)-Se(41) | 128.0(6)  |
| C(45)-C(50)-Se(41) | 111.9(6)  |
| N(42)-C(51)-C(53)  | 108.2(7)  |
| N(42)-C(51)-C(52)  | 109.1(8)  |
| C(53)-C(51)-C(52)  | 115.5(9)  |
| C(58)-C(53)-C(54)  | 118.7(9)  |
| C(58)-C(53)-C(51)  | 123.3(9)  |
| C(54)-C(53)-C(51)  | 117.9(9)  |
| C(55)-C(54)-C(53)  | 121.0(9)  |
| C(54)-C(55)-C(56)  | 120.4(10) |
| C(57)-C(56)-C(55)  | 119.6(9)  |
| C(56)-C(57)-C(58)  | 120.1(9)  |
| C(53)-C(58)-C(57)  | 120.1(9)  |
| N(62)-Se(61)-C(70) | 85.8(3)   |
| C(63)-N(62)-C(71)  | 123.9(7)  |
| C(63)-N(62)-Se(61) | 116.8(5)  |
| C(71)-N(62)-Se(61) | 118.8(5)  |
| O(64)-C(63)-N(62)  | 124.9(7)  |
| O(64)-C(63)-C(65)  | 125.1(7)  |
| N(62)-C(63)-C(65)  | 110.0(6)  |

|                    |           |
|--------------------|-----------|
| C(66)-C(65)-C(70)  | 120.2(8)  |
| C(66)-C(65)-C(63)  | 123.9(7)  |
| C(70)-C(65)-C(63)  | 115.8(7)  |
| C(67)-C(66)-C(65)  | 117.8(8)  |
| C(68)-C(67)-C(66)  | 121.2(9)  |
| C(69)-C(68)-C(67)  | 121.2(9)  |
| C(68)-C(69)-C(70)  | 118.5(8)  |
| C(69)-C(70)-C(65)  | 121.1(8)  |
| C(69)-C(70)-Se(61) | 127.5(6)  |
| C(65)-C(70)-Se(61) | 111.5(6)  |
| N(62)-C(71)-C(73)  | 110.2(7)  |
| N(62)-C(71)-C(72)  | 111.1(8)  |
| C(73)-C(71)-C(72)  | 114.8(8)  |
| C(78)-C(73)-C(74)  | 117.4(8)  |
| C(78)-C(73)-C(71)  | 119.3(8)  |
| C(74)-C(73)-C(71)  | 123.2(8)  |
| C(75)-C(74)-C(73)  | 121.2(9)  |
| C(76)-C(75)-C(74)  | 119.3(10) |
| C(75)-C(76)-C(77)  | 121.1(10) |
| C(78)-C(77)-C(76)  | 119.1(9)  |
| C(77)-C(78)-C(73)  | 121.8(9)  |
| N(82)-Se(81)-C(90) | 84.2(3)   |
| C(83)-N(82)-C(91)  | 123.2(7)  |
| C(83)-N(82)-Se(81) | 117.4(6)  |
| C(91)-N(82)-Se(81) | 119.0(6)  |
| O(84)-C(83)-N(82)  | 124.1(7)  |
| O(84)-C(83)-C(85)  | 125.9(8)  |
| N(82)-C(83)-C(85)  | 109.9(7)  |
| C(90)-C(85)-C(86)  | 119.7(8)  |
| C(90)-C(85)-C(83)  | 116.3(8)  |
| C(86)-C(85)-C(83)  | 124.0(7)  |
| C(87)-C(86)-C(85)  | 118.9(8)  |
| C(86)-C(87)-C(88)  | 120.7(9)  |
| C(87)-C(88)-C(89)  | 121.1(8)  |
| C(88)-C(89)-C(90)  | 116.8(8)  |
| C(85)-C(90)-C(89)  | 122.7(8)  |
| C(85)-C(90)-Se(81) | 112.2(6)  |
| C(89)-C(90)-Se(81) | 125.0(7)  |
| N(82)-C(91)-C(93)  | 109.8(7)  |
| N(82)-C(91)-C(92)  | 109.1(9)  |
| C(93)-C(91)-C(92)  | 115.7(9)  |
| C(98)-C(93)-C(94)  | 118.3(8)  |
| C(98)-C(93)-C(91)  | 123.4(9)  |
| C(94)-C(93)-C(91)  | 118.3(8)  |
| C(95)-C(94)-C(93)  | 121.2(10) |
| C(96)-C(95)-C(94)  | 120.0(11) |
| C(95)-C(96)-C(97)  | 118.8(10) |
| C(96)-C(97)-C(98)  | 121.6(10) |
| C(93)-C(98)-C(97)  | 120.0(9)  |

**Table S7.** Torsion angles [°] for **25a**.

|                          |           |
|--------------------------|-----------|
| C(11)-N(2)-C(3)-O(4)     | 1.8(12)   |
| Se(1)-N(2)-C(3)-O(4)     | -176.7(6) |
| C(11)-N(2)-C(3)-C(5)     | 178.1(7)  |
| Se(1)-N(2)-C(3)-C(5)     | -0.5(9)   |
| O(4)-C(3)-C(5)-C(10)     | 178.7(8)  |
| N(2)-C(3)-C(5)-C(10)     | 2.5(10)   |
| O(4)-C(3)-C(5)-C(6)      | -2.9(13)  |
| N(2)-C(3)-C(5)-C(6)      | -179.1(7) |
| C(10)-C(5)-C(6)-C(7)     | -0.7(13)  |
| C(3)-C(5)-C(6)-C(7)      | -179.0(8) |
| C(5)-C(6)-C(7)-C(8)      | -0.2(13)  |
| C(6)-C(7)-C(8)-C(9)      | 0.9(14)   |
| C(7)-C(8)-C(9)-C(10)     | -0.8(13)  |
| C(6)-C(5)-C(10)-C(9)     | 0.9(13)   |
| C(3)-C(5)-C(10)-C(9)     | 179.3(7)  |
| C(6)-C(5)-C(10)-Se(1)    | 178.2(6)  |
| C(3)-C(5)-C(10)-Se(1)    | -3.3(9)   |
| C(8)-C(9)-C(10)-C(5)     | -0.1(13)  |
| C(8)-C(9)-C(10)-Se(1)    | -177.0(7) |
| N(2)-Se(1)-C(10)-C(5)    | 2.4(6)    |
| N(2)-Se(1)-C(10)-C(9)    | 179.5(8)  |
| C(3)-N(2)-C(11)-C(13)    | -154.0(7) |
| Se(1)-N(2)-C(11)-C(13)   | 24.5(9)   |
| C(3)-N(2)-C(11)-C(12)    | 79.0(9)   |
| Se(1)-N(2)-C(11)-C(12)   | -102.5(7) |
| N(2)-C(11)-C(13)-C(14)   | 87.1(9)   |
| C(12)-C(11)-C(13)-C(14)  | -148.5(8) |
| N(2)-C(11)-C(13)-C(18)   | -89.6(9)  |
| C(12)-C(11)-C(13)-C(18)  | 34.8(11)  |
| C(18)-C(13)-C(14)-C(15)  | 1.4(13)   |
| C(11)-C(13)-C(14)-C(15)  | -175.4(8) |
| C(13)-C(14)-C(15)-C(16)  | -1.2(14)  |
| C(14)-C(15)-C(16)-C(17)  | 0.9(14)   |
| C(15)-C(16)-C(17)-C(18)  | -0.8(14)  |
| C(16)-C(17)-C(18)-C(13)  | 0.9(13)   |
| C(14)-C(13)-C(18)-C(17)  | -1.2(12)  |
| C(11)-C(13)-C(18)-C(17)  | 175.6(8)  |
| C(30)-Se(21)-N(22)-C(23) | -1.3(6)   |
| C(30)-Se(21)-N(22)-C(31) | 179.5(7)  |
| C(31)-N(22)-C(23)-O(24)  | 2.2(13)   |
| Se(21)-N(22)-C(23)-O(24) | -177.0(6) |
| C(31)-N(22)-C(23)-C(25)  | -178.8(8) |
| Se(21)-N(22)-C(23)-C(25) | 2.1(9)    |
| O(24)-C(23)-C(25)-C(26)  | -0.7(14)  |
| N(22)-C(23)-C(25)-C(26)  | -179.8(8) |
| O(24)-C(23)-C(25)-C(30)  | 177.1(8)  |

|                          |            |
|--------------------------|------------|
| N(22)-C(23)-C(25)-C(30)  | -1.9(10)   |
| C(30)-C(25)-C(26)-C(27)  | 0.9(13)    |
| C(23)-C(25)-C(26)-C(27)  | 178.6(8)   |
| C(25)-C(26)-C(27)-C(28)  | -1.2(14)   |
| C(26)-C(27)-C(28)-C(29)  | 0.8(15)    |
| C(27)-C(28)-C(29)-C(30)  | -0.1(13)   |
| C(28)-C(29)-C(30)-C(25)  | -0.2(13)   |
| C(28)-C(29)-C(30)-Se(21) | -179.2(7)  |
| C(26)-C(25)-C(30)-C(29)  | -0.2(13)   |
| C(23)-C(25)-C(30)-C(29)  | -178.2(7)  |
| C(26)-C(25)-C(30)-Se(21) | 178.9(6)   |
| C(23)-C(25)-C(30)-Se(21) | 1.0(10)    |
| N(22)-Se(21)-C(30)-C(29) | 179.2(8)   |
| N(22)-Se(21)-C(30)-C(25) | 0.1(6)     |
| C(23)-N(22)-C(31)-C(32)  | 86.4(10)   |
| Se(21)-N(22)-C(31)-C(32) | -94.5(9)   |
| C(23)-N(22)-C(31)-C(33)  | -146.7(8)  |
| Se(21)-N(22)-C(31)-C(33) | 32.4(10)   |
| N(22)-C(31)-C(33)-C(38)  | -104.2(10) |
| C(32)-C(31)-C(33)-C(38)  | 19.7(13)   |
| N(22)-C(31)-C(33)-C(34)  | 75.2(10)   |
| C(32)-C(31)-C(33)-C(34)  | -160.8(9)  |
| C(38)-C(33)-C(34)-C(35)  | 3.3(14)    |
| C(31)-C(33)-C(34)-C(35)  | -176.2(9)  |
| C(33)-C(34)-C(35)-C(36)  | -1.5(16)   |
| C(34)-C(35)-C(36)-C(37)  | -0.9(17)   |
| C(35)-C(36)-C(37)-C(38)  | 1.4(16)    |
| C(34)-C(33)-C(38)-C(37)  | -2.8(13)   |
| C(31)-C(33)-C(38)-C(37)  | 176.7(9)   |
| C(36)-C(37)-C(38)-C(33)  | 0.5(15)    |
| C(50)-Se(41)-N(42)-C(43) | -3.6(7)    |
| C(50)-Se(41)-N(42)-C(51) | 177.6(8)   |
| C(51)-N(42)-C(43)-O(44)  | 3.4(15)    |
| Se(41)-N(42)-C(43)-O(44) | -175.3(7)  |
| C(51)-N(42)-C(43)-C(45)  | -176.7(9)  |
| Se(41)-N(42)-C(43)-C(45) | 4.6(10)    |
| O(44)-C(43)-C(45)-C(46)  | -3.2(16)   |
| N(42)-C(43)-C(45)-C(46)  | 177.0(9)   |
| O(44)-C(43)-C(45)-C(50)  | 176.7(9)   |
| N(42)-C(43)-C(45)-C(50)  | -3.1(11)   |
| C(50)-C(45)-C(46)-C(47)  | -1.7(14)   |
| C(43)-C(45)-C(46)-C(47)  | 178.2(9)   |
| C(45)-C(46)-C(47)-C(48)  | -0.7(16)   |
| C(46)-C(47)-C(48)-C(49)  | 3.2(16)    |
| C(47)-C(48)-C(49)-C(50)  | -3.1(14)   |
| C(48)-C(49)-C(50)-C(45)  | 0.7(13)    |
| C(48)-C(49)-C(50)-Se(41) | -177.6(7)  |
| C(46)-C(45)-C(50)-C(49)  | 1.7(13)    |
| C(43)-C(45)-C(50)-C(49)  | -178.1(8)  |

|                          |           |
|--------------------------|-----------|
| C(46)-C(45)-C(50)-Se(41) | -179.8(7) |
| C(43)-C(45)-C(50)-Se(41) | 0.4(10)   |
| N(42)-Se(41)-C(50)-C(49) | -180.0(8) |
| N(42)-Se(41)-C(50)-C(45) | 1.6(6)    |
| C(43)-N(42)-C(51)-C(53)  | -134.0(9) |
| Se(41)-N(42)-C(51)-C(53) | 44.6(10)  |
| C(43)-N(42)-C(51)-C(52)  | 99.6(12)  |
| Se(41)-N(42)-C(51)-C(52) | -81.8(9)  |
| N(42)-C(51)-C(53)-C(58)  | -114.9(9) |
| C(52)-C(51)-C(53)-C(58)  | 7.7(13)   |
| N(42)-C(51)-C(53)-C(54)  | 61.8(11)  |
| C(52)-C(51)-C(53)-C(54)  | -175.6(9) |
| C(58)-C(53)-C(54)-C(55)  | 0.5(14)   |
| C(51)-C(53)-C(54)-C(55)  | -176.3(9) |
| C(53)-C(54)-C(55)-C(56)  | -0.4(16)  |
| C(54)-C(55)-C(56)-C(57)  | 0.3(16)   |
| C(55)-C(56)-C(57)-C(58)  | -0.4(15)  |
| C(54)-C(53)-C(58)-C(57)  | -0.6(12)  |
| C(51)-C(53)-C(58)-C(57)  | 176.0(8)  |
| C(56)-C(57)-C(58)-C(53)  | 0.6(13)   |
| C(70)-Se(61)-N(62)-C(63) | -2.6(6)   |
| C(70)-Se(61)-N(62)-C(71) | -175.3(7) |
| C(71)-N(62)-C(63)-O(64)  | -3.1(13)  |
| Se(61)-N(62)-C(63)-O(64) | -175.3(6) |
| C(71)-N(62)-C(63)-C(65)  | 176.0(7)  |
| Se(61)-N(62)-C(63)-C(65) | 3.7(9)    |
| O(64)-C(63)-C(65)-C(66)  | -5.1(13)  |
| N(62)-C(63)-C(65)-C(66)  | 175.9(8)  |
| O(64)-C(63)-C(65)-C(70)  | 175.9(8)  |
| N(62)-C(63)-C(65)-C(70)  | -3.2(10)  |
| C(70)-C(65)-C(66)-C(67)  | -1.5(13)  |
| C(63)-C(65)-C(66)-C(67)  | 179.4(8)  |
| C(65)-C(66)-C(67)-C(68)  | -0.4(14)  |
| C(66)-C(67)-C(68)-C(69)  | 1.7(15)   |
| C(67)-C(68)-C(69)-C(70)  | -1.0(13)  |
| C(68)-C(69)-C(70)-C(65)  | -1.0(12)  |
| C(68)-C(69)-C(70)-Se(61) | 179.2(7)  |
| C(66)-C(65)-C(70)-C(69)  | 2.3(12)   |
| C(63)-C(65)-C(70)-C(69)  | -178.6(7) |
| C(66)-C(65)-C(70)-Se(61) | -177.9(6) |
| C(63)-C(65)-C(70)-Se(61) | 1.2(9)    |
| N(62)-Se(61)-C(70)-C(69) | -179.5(8) |
| N(62)-Se(61)-C(70)-C(65) | 0.6(6)    |
| C(63)-N(62)-C(71)-C(73)  | -109.3(9) |
| Se(61)-N(62)-C(71)-C(73) | 62.8(9)   |
| C(63)-N(62)-C(71)-C(72)  | 122.3(9)  |
| Se(61)-N(62)-C(71)-C(72) | -65.6(9)  |
| N(62)-C(71)-C(73)-C(78)  | 76.5(10)  |
| C(72)-C(71)-C(73)-C(78)  | -157.2(8) |

|                          |            |
|--------------------------|------------|
| N(62)-C(71)-C(73)-C(74)  | -100.2(9)  |
| C(72)-C(71)-C(73)-C(74)  | 26.1(12)   |
| C(78)-C(73)-C(74)-C(75)  | -0.2(13)   |
| C(71)-C(73)-C(74)-C(75)  | 176.5(9)   |
| C(73)-C(74)-C(75)-C(76)  | 0.7(14)    |
| C(74)-C(75)-C(76)-C(77)  | -0.1(15)   |
| C(75)-C(76)-C(77)-C(78)  | -0.9(16)   |
| C(76)-C(77)-C(78)-C(73)  | 1.4(15)    |
| C(74)-C(73)-C(78)-C(77)  | -0.8(13)   |
| C(71)-C(73)-C(78)-C(77)  | -177.7(9)  |
| C(90)-Se(81)-N(82)-C(83) | -2.7(7)    |
| C(90)-Se(81)-N(82)-C(91) | -176.3(8)  |
| C(91)-N(82)-C(83)-O(84)  | -0.2(15)   |
| Se(81)-N(82)-C(83)-O(84) | -173.5(7)  |
| C(91)-N(82)-C(83)-C(85)  | 176.2(8)   |
| Se(81)-N(82)-C(83)-C(85) | 2.9(10)    |
| O(84)-C(83)-C(85)-C(90)  | 174.9(8)   |
| N(82)-C(83)-C(85)-C(90)  | -1.5(11)   |
| O(84)-C(83)-C(85)-C(86)  | -4.0(14)   |
| N(82)-C(83)-C(85)-C(86)  | 179.6(8)   |
| C(90)-C(85)-C(86)-C(87)  | -0.9(13)   |
| C(83)-C(85)-C(86)-C(87)  | 178.0(8)   |
| C(85)-C(86)-C(87)-C(88)  | -0.6(14)   |
| C(86)-C(87)-C(88)-C(89)  | 0.9(15)    |
| C(87)-C(88)-C(89)-C(90)  | 0.3(14)    |
| C(86)-C(85)-C(90)-C(89)  | 2.2(13)    |
| C(83)-C(85)-C(90)-C(89)  | -176.7(8)  |
| C(86)-C(85)-C(90)-Se(81) | 178.4(7)   |
| C(83)-C(85)-C(90)-Se(81) | -0.5(10)   |
| C(88)-C(89)-C(90)-C(85)  | -1.9(13)   |
| C(88)-C(89)-C(90)-Se(81) | -177.6(6)  |
| C(83)-N(82)-C(91)-C(93)  | -129.8(9)  |
| Se(81)-N(82)-C(91)-C(93) | 43.4(11)   |
| C(83)-N(82)-C(91)-C(92)  | 102.5(12)  |
| Se(81)-N(82)-C(91)-C(92) | -84.3(10)  |
| N(82)-C(91)-C(93)-C(98)  | -120.6(9)  |
| C(92)-C(91)-C(93)-C(98)  | 3.4(14)    |
| N(82)-C(91)-C(93)-C(94)  | 57.7(11)   |
| C(92)-C(91)-C(93)-C(94)  | -178.3(10) |
| C(98)-C(93)-C(94)-C(95)  | 1.1(13)    |
| C(91)-C(93)-C(94)-C(95)  | -177.3(8)  |
| C(93)-C(94)-C(95)-C(96)  | -1.3(15)   |
| C(94)-C(95)-C(96)-C(97)  | 1.2(15)    |
| C(95)-C(96)-C(97)-C(98)  | -0.9(15)   |
| C(94)-C(93)-C(98)-C(97)  | -0.8(13)   |
| C(91)-C(93)-C(98)-C(97)  | 177.5(8)   |
| C(96)-C(97)-C(98)-C(93)  | 0.7(14)    |

**Table S8.** Hydrogen bonds for **25a** [Å and °].

| D-H...A               | d(D-H) | d(H...A) | d(D...A)  | <(DHA) |
|-----------------------|--------|----------|-----------|--------|
| C(9)-H(9)...O(4)#1    | 0.95   | 2.28     | 2.953(10) | 127.3  |
| C(29)-H(29)...O(44)#2 | 0.95   | 2.36     | 3.037(10) | 128.1  |
| C(49)-H(49)...O(24)   | 0.95   | 2.35     | 3.020(10) | 127.1  |
| C(69)-H(69)...O(84)   | 0.95   | 2.45     | 3.125(10) | 127.8  |
| C(89)-H(89)...O(64)#3 | 0.95   | 2.50     | 3.200(11) | 130.6  |

Symmetry transformations used to generate equivalent atoms:.

#1 -x+1,y-1/2,-z+1/2    #2 x,y-1,z    #3 x,y+1,z    .
